# Supplementary material for: Efficient multi-angle polarimetric inversion of aerosols and oceancolor powered by a deep neural network forward model
Source: Copernicus journal article supplement (doi:10.5194/amt-2020-507), 2021-02-09
Supplement: Supplementary file [file amt-2020-507-AC2-supplement.pdf]

## Response to the report of reviewer 1:

Thanks to the reviewer for his time and efforts in reviewing this work. The comments and questions are valuable in improving the clarity of this work. We have responses below with manuscript revised accordingly. Improved retrieval results with doubled spatial resolution are updated in Sec 5. We also made the datasets including all AirHARP retrieval results publicly available with a link specified in the manuscript ([https://data.nasa.gov/Earth-Science/FastMAPOL\\_ACEPOL\\_AIRHARP\\_L2/8b9y-7rgh](https://data.nasa.gov/Earth-Science/FastMAPOL_ACEPOL_AIRHARP_L2/8b9y-7rgh)).

The authors use a preexisting radiative transfer (RT) code to train a neural network (NN) to output polarimetric radiances at the angles and wavelengths of the AirHARP instrument. The computationally inexpensive NN forward model is then paired with the inversion module of the preexisting MAPOL algorithm to produce a new hybrid retrieval (FastMAPOL) that is less computationally expensive than the original method. The FastMAPOL retrieval is tested on both synthetic data and real ACEPOL measurements made by the AirHARP instrument and, in both cases, good retrieval performance is observed.

Polarimetric remote sensing has the potential to provide enhanced aerosol information but the large number of free parameters in most multiangle polarimeter (MAP) retrieval algorithms generally prohibits the use of precomputed lookup tables. This fact frequently necessitates computationally expensive online radiative transfer calculations which pose a significant challenge for operational algorithms that need to process very large data volumes. The authors provide a convincing demonstration of a machine learning approach that significantly reduces this computational burden. Care is taken to ensure that the NN reproduces the original RT with high fidelity and tests involving synthetic and real data both show good retrieval performance. The approach appears to be technically sound and has the potential to serve as a foundation for retrieval developments pertaining to PACE and other future missions employing MAPs. Furthermore, the content of the manuscript is well organized, and the material is clearly appropriate for AMT. Therefore, once the comments below have been addressed, I can confidently recommend publication.

Thanks for the summary and the positive comments.

## Specific Comments

1. P2, LN21: The list of MAPS in the sentence beginning on this line seems to have an extra "and". It also is inconsistent in its use of the name of sensor or the overarching mission. I would recommend rephrasing.

Thank you for the suggestion. We have revised the sentence as follows:

“Several satellite missions plan to carry MAP instruments, which are scheduled to be launched in the time frame of 2023-2024, including the European Space Agency (ESA)’s Multi-viewing Multi-channel Multi-polarisation Imager (3MI) **on board the Metop-SG satellites** (Fougnie et al, 2018), the National Aeronautics and Space Administration (NASA)’s Multi-Angle Imager for

Aerosols (MAIA) (Diner et al, 2018) and Plankton, Aerosol, Cloud, ocean Ecosystem (PACE) (Werdell et al 2019) missions.”

Details on PACE instruments are provided in the next paragraph in the manuscript. .

2. P3, LN22: Did the authors intended to say "...references within)."?

Corrected.

3. P4, LN2: Citation should be inline (no leading parenthesis)

Corrected.

4. P4, LN4: Should read "...benefits of using..."

Corrected.

5. P4, LN32: "have" should be "has"

Corrected.

6. P5, LN8: It would be clearer to say something along the lines of "...observational altitude..." since not all members of the HARP family are aircraft instruments.

Thanks. We have revised the phrase as recommended.

7. P6, LN6: AirHARP's swath width aboard the ER2 should be provided.

Thank you for the suggestion. The following sentence is moved to the first paragraph in Sec 5 with swath width added:

“AirHARP conducted high spatial resolution measurements with a grid size of 55 m and **swath width of 42km at nadir (up to 60km at far angles)**. We averaged the reflectance and DoLP respectively within a bin box of 10 x 10 pixels (550m × 550 m).”

8. P6, LN8: Is  $\sigma_{avg}$  the regular standard deviation of all 100 pixels in the box or is it the standard error of the mean (e.g.,  $\sigma/\sqrt{N}=\sigma/10$ )? The latter strikes me as a more appropriate choice as I believe the retrievals are performed on the means of the aggregated 10x10 boxes. The definition of  $\sigma_{avg}$  needs to be clarified, and justification for that particular definition should be provided.

Thank you for the discussion.  $\sigma_{avg}$  is used to capture the spatial variation of geophysical properties within the bin box, which provides a good uncertainty indicator for field measurement. This is why we used it in our previous noise model. However, how to include  $\sigma_{avg}$  in the noise model depends on the assumption of the noise properties. From

our recent tests, we adjusted our approach and further improved our retrieval performance through 1) quality check of the measurement data, 2) adding a constraint in aerosol model, 3) using  $\sigma_{\text{avg}}$  to evaluate measurement uncertainty, but not in the noise model. Since  $\sigma/\sqrt{N}=\sigma/10$  is much smaller than the calibration uncertainty, our new noise model is similar to what the reviewer suggested. A corresponding discussion is provided in Sec 5:

“To assess the spatial variability of field measurement, we computed the standard deviations for the reflectance ( $\sigma_{\rho,\text{avg}}$ ) and DoLP ( $\sigma_{\text{P},\text{avg}}$ ) within the bin box. Representative values are provided in Table 5. The values of  $\sigma_{\rho,\text{avg}}$  and  $\sigma_{\text{P},\text{avg}}$  at 870nm band are 4.5% and 0.05, respectively, which suggests larger measurement uncertainties at 870nm than other bands probably due to small radiometric magnitudes. Meanwhile, our retrieval tests showed larger coarse mode retrieval uncertainties than synthetic data results. To better constrain retrievals, we assume the coarse mode aerosol as sea salt by setting its imaginary refractive index to zero. All other retrieval parameter range are kept the same as in Table 2. Furthermore, we found our forward model cannot predict the angular variation of DoLP in 440nm band well (with an estimated MAE of 0.04), which contributes a major portion to the cost function and increases both fine and coarse mode retrieval uncertainties. Therefore, we exclude DoLP in 440nm band from our retrievals in this study.”

The corresponding results are updated in Sec 5, and more details are provided in the responses to comments 27-29.

9. P6, LN18: As I understand it,  $\sigma_{\text{NN}}$  is actually the difference between the RT code and NN, not the NN's uncertainty in an absolute sense. I would recommend clarifying what is meant by “uncertainty” here.

The reviewer is correct. To evaluate the NN accuracy, we generate a synthetic AirHARP datasets with multiple angle setup. This is more realistic than the single angle used in training data. The NN accuracy is then computed by the RMSE between the NN predictions and the synthetic data. Detailed discussions are in Sec 3.3. We added the following sentence for clarification.

“ $\sigma_{\text{NN}}$  is evaluated by comparing with synthetic multi-angle AirHARP measurements discussed in Sec 3.3. “

10. P6, LN32: I generally take "trace gases" to be those gases in the atmosphere other than nitrogen, oxygen, and argon. Was Rayleigh scattering from these three non-trace gases taken into account above the aircraft? Please clarify.

Thank you for the question. Full Rayleigh scatterings is considered. We have revised the sentence to be more precise as follows:

“The atmosphere is configured as three layers: **a top molecular layer above the aircraft**, a molecular layer in the middle below the aircraft, and an aerosol and molecular mixing layer on the bottom with a height of 2 km. Aerosols are **assumed to be uniformly distributed in the mixing layer** as shown in the left panel of Fig. 1. The same vertical structure of the atmosphere was successfully used in the inversion of RSP data (Gao et al 2019, 2020).

**The atmospheric surface pressure is assumed to be one standard atmosphere pressure, which is consistent with the value discussed in Sec 5. Anisotropic molecular Rayleigh scatterings are accounted (Hansen et al 1974) .**The molecular absorption properties are computed by the hyperspectral line-by-line atmospheric radiative transfer simulator (ARTS) (Buehler et al. 2005) with the molecular absorption parameters of oxygen, water vapor, methane, and carbon dioxide from the HITRAN database (Gordon et al. 2017). The gas absorption of ozone and nitrogen dioxide are from Gorshchev et al. 2014, Serdyuchenko et al. 2014 and Bogumil, K., et al. 2003, respectively. The hyperspectral absorption coefficients are then averaged within the instrument spectral response function and used in the multiple scattering radiative transfer simulation (Zhai et al 2009, 2010, 2018). The molecular profile used is the US standard atmospheric constituent profiles (Anderson et al, 1986)

“

The following references are added:

Buehler, S. A., P. Eriksson, T. Kuhn, A. von Engeln and C. Verdes (2005), ARTS, the Atmospheric Radiative Transfer Simulator, *J. Quant. Spectrosc. Radiat. Transfer*, *91*(1), 65-93, doi:10.1016/j.jqsrt.2004.05.051.

I.E. Gordon, L.S. Rothman, C. Hill et al., "The HITRAN2016 Molecular Spectroscopic Database", *Journal of Quantitative Spectroscopy and Radiative Transfer* **203**, 3-69 (2017).

Gorshchev, V., Serdyuchenko, A., Weber, M., Chehade, W., and Burrows, J. P.: High spectral resolution ozone absorption cross-sections – Part 1: Measurements, data analysis and comparison with previous measurements around 293 K, *Atmos. Meas. Tech.*, *7*, 609–624, <https://doi.org/10.5194/amt-7-609-2014>, 2014.

Serdyuchenko, A., Gorshchev, V., Weber, M., Chehade, W., and Burrows, J. P.: High spectral resolution ozone absorption cross-sections – Part 2: Temperature dependence, *Atmos. Meas. Tech.*, *7*, 625–636, <https://doi.org/10.5194/amt-7-625-2014>, 2014.

Bogumil, K., et al. (2003), Measurements of molecular absorption spectra with the SCIAMACHY pre-flight model: Instrument characterization and reference



data for atmospheric remote-sensing in the 230–2380 nm region, J. Photochem. Photobiol. A: Chem, 157(2–3), 167–184, doi:10.1016/S1010-6030(3)00062-5.

11. P7, LN18: The term "visible spectrum" should be replaced with something that also includes HARP's 870 nm NIR channel.

Thank you for the suggestion. We have revised the sentence as follows:

“For the application to AirHARP bands,  $p_1$  for the real part of the refractive index is approximately spectrally flat for both the fine and coarse mode aerosols **within the AirHARP spectral range.**”

12. P7: The vertical profile assumed for the simulated aerosol should be described.

Thank you for the question. The aerosol profile is assumed uniform within 2km range. Please refer to response to comment 10.

13. P9, LN13: Only 14 quantities are listed but it's stated that the forward calculation uses 15 parameters. The 15th parameter should be included in this summary paragraph (presumably ozone column density?).

Thank you for pointing this out. We have added the ozone density in the sentence as follows:

“In summary, the parameters used to represent the forward model include five volume densities (one for each submode), four independent parameters for the refractive indices of fine and coarse modes, one parameter for wind speed, **ozone column density**, and Chla.”

14. P9: Should some of the quantities in the equations of section 2.2 have an azimuthal dependence, as well as solar and viewing zenith angle dependence? Why do the equations here show these quantities to be functions of the latter two, but not relative azimuth?

Thank you for the comments. The reviewer is correct. There are dependencies on relative azimuth. We revised the equation by explicitly adding the relative azimuth into the equations (10), (11), (13) and (14).

15. P9: Equation (11) contains an extra parenthesis.

Corrected.

16. P10, LN11: This sentence needs to be reworked so that it is grammatically correct. Also, it should be specified exactly which angle is less than  $1^\circ$  (viewing zenith angle?).

Thank you for the question. Previously sentence is not accurate. We revised the sentence and add more details:

“To compute the remote sensing reflectance from the multi-angle AirHARP measurement, we only consider the reflectance at the minimum viewing zenith angle for each wavelength and apply the atmospheric correction and BRDF correction as discussed above. For  $\theta'_v < 15^\circ$  ( $\theta_v < 20^\circ$ ), the  $R_o/R$  factor is approximately a constant value of 1, but for larger  $\theta'_v$  angles the ratio increases with both wind speed and  $\theta'_v$  value (Morel et al 1996, 2002). In this study, we ignored the  $R_o/R$  factor in Eq. (14), which will not impact Rrs retrievals from synthetic data due to the small viewing zenith angle used, but may cause underestimation of Rrs at the edge of the image, as will be discussed in Sec 4 and 5.”

Sec 4 added more details regarding synthetic data:

“Note that the  $R_o/R$  factor will not impact the BRDF correction in computing Rrs for the synthetic data, because of the small viewing zenith angle used at the four AirHARP bands, which are  $1.22^\circ, 1.17^\circ, 0.03^\circ, 3.52^\circ$  respectively “

Further discussions are added for field data (please also refer to response to comment 20):

“As discussed in Sec 2.2, we chose the minimum viewing zenith angle available from the measurements after removing the sunglint. The removal of sunglint improves the Rrs calculation for Scene 2 as shown in Fig. 16. Moreover, we ignored the  $R_o/R$  factor in Eq. 14 which may cause underestimation of the Rrs at the edge of the image where  $\theta_v$  can reach as large as  $60^\circ$ . However, it is challenging to analyze its impact at large  $\theta_v$  angles.  $R_o/R$  has a strong dependency on wind speed, but the retrieved wind speeds from current retrievals show large uncertainties. Further work may require a better treatment of sunglint and improved accuracy in wind speed.”

17. P11, L2: A more precise description of the method of random sampling should be given. Are the variables being drawn from a uniform distribution (log-uniform distribution in the case of Chla)?

Thank you for the suggestion. We revised the sentence as follows:

“The solar zenith angle, ozone column density, refractive index, and wind speed are randomly sampled **from a uniform distribution**. Chla is randomly sampled from **a log-uniform distribution**.”

18. P12, LN14: Here it is stated that separate NNs are used for reflectance and DoLP. Instead of two separate NNs, another potential approach would have been to use a single NN with an 8-dimensional output (4 reflectance + 4 DoLP values). It would be beneficial if the authors could further elaborate on the pros and cons of these two possible approaches, and their motivation for using the particular 2 network architecture that was ultimately chosen.

Thank you for the questions. We choose the current approach with the consideration of both flexibility and efficiency. Combining two NNs together may lead to better efficiency. However, there are several challenges with this strategy: 1) as shown in the Figure 2 and 3, reflectance and DoLP differ in angular variations which may increase the difficulties in training the neural network without increasing the size of NN: 2) there are different accuracy requirements for reflectance and DoLP, which is easier to control when the two NNs are separated. There could be other ways to combine reflectance with DoLP such as working with I, Q, U directly, which we will explore in future work.

We added the corresponding discussions into Sec. 3.1:

“

To maintain both flexibility and efficiency, we trained two NN models for reflectance and DoLP respectively in the next section. Reflectance and DoLP have different accuracy requirements as discussed in Sec. 2, and also differ in angular variations as shown in the Figs. 2, therefore, it is convenient to control their accuracy through separated training procedures.

“

19. P19, LN 5: Is the added noise uncorrelated in angle, polarization and wavelength? If so, how would the authors expect more realistic calibration errors (which likely will be strongly correlated among these three dimensions) to impact their results?

Thank you for the question. Yes, we assume no correlation in the added noise. We conducted an independent study in which noise was added with correlation in angles, and observed overfitting in retrievals (reduction of  $\chi^2$ ). This is related to the fact that some noise variations are long angular range in nature, which can be similar to some true signals and thus get fitted by the optimization process. The quantified influence depends on the magnitude of the noise and the strength of the correlation (Knobelspiesse OE 2012), which requires further study.

20. P22: There is an extra parenthesis in the title of the Chla subplot of Figure 9.

Removed.

21. P22, LN5: The last two sentences of this paragraph have several grammatical errors and are a bit confusing. I suggest rephrasing.

We revised the sentence as follows:

“...For wind speed larger than 3 m/s, the averaged retrieval uncertainty is 1.2 m/s with a small variation less than 0.1 m/s. “

22. P23, LN14: Should read "...less sensitive to outliers." (No "the")

Corrected.

23. P23, LN14: "...applied to the synthetic measurements..."

Corrected.

24. P23, LN23: The sentence starting on this line has several grammatical errors and needs rewriting.

We revised the sentence as follows:

“For 440 nm band, when AOD is less than 0.3, the Rrs retrieval uncertainties are less than  $0.0005 \text{ sr}^{-1}$ ; but the uncertainties become as high as  $0.001 \text{ sr}^{-1}$  at a larger AOD of 0.5”.

25. P23, LN28: It would be clearer if the phrase "the reduction of" was changed to "reduce".

Revised.

26. P25, FIG12: The figure would be easier to interpret if the caption explained that the "hole" in the middle of the three polar plots was due to water condensation on the lens. I thought it was a plotting artifact, as it lines up the "0°" label, until I read the full condensation explanation later in the text. It might even be good to remove the "0°" tick completely.

In addition to the explanation in the main text, we added a sentence in the caption:

“ The central portion in the viewing angle plots is removed due to water condensation on the lens.“

We prefer to keep the 0 degree symbol to ensure readers understand the central point refers to nadir (with no removal of zenith angles in the plots).

27. P26, LN20: The last sentence needs to have grammatical errors fixed and its meaning clarified.

As discussed for comment 8, we have improved the retrieval performance with a new  $\chi^2$  histogram shown below. The discussion of  $\chi^2$  is combined with a latter sentence as discussed for the next comment. We revised the sentence as follows:

“The histograms of  $\chi^2$  for all pixels retrieved in each scene are shown in Fig. 14. The most probable  $\chi^2$  are 1.1, 1.7, and 1.1 respectively.”

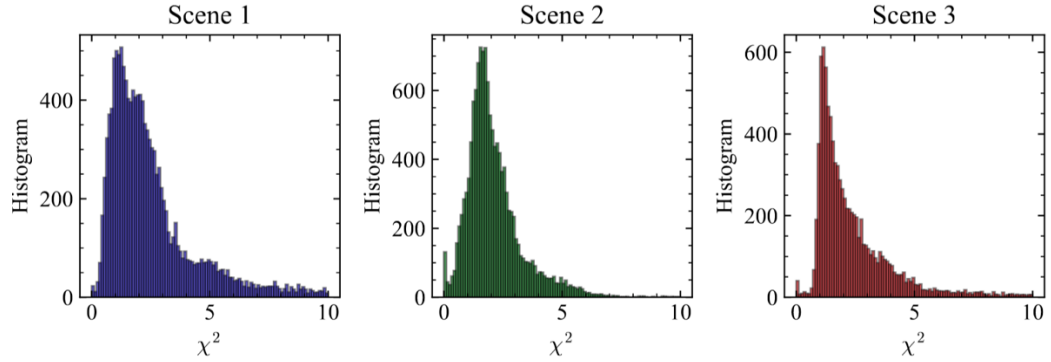

*Figure 14. The histograms of the cost function values over the three scenes as shown in Fig. 12 with total pixel numbers of 13491, 13226, and 9159. Only pixels over the ocean are considered.*

28. P27, LN5: More discussion of the along-track stripping in  $\chi^2$  values should be provided. In many cases, it does not seem to correlate with the number of view angles available. For example, the most prominent  $\sim 10$  pixel wide dark red strip of  $\chi^2$  in Figure 15 is actually offset to the right by about five pixels of the band of missing angles at nadir. What is the cause of this artifact?

Thank you for checking the images and questions. We investigated the stripes, and found anomalies from both measurements and retrieved results, which have been corrected (Fig 15). Meanwhile, we have updated the retrievals as discussed in comment 8. The spatial resolutions are also doubled. The new plots are shown below for Figure 15-17. Note that due to the use of smaller uncertainties in the noise model (without contribution from  $\sigma_{avg}$ ), the overall value of  $\chi^2$  increased, but we still have a majority of pixels converging to within  $\chi^2 < 2 \sim 3$ .

More discussion was added to the paragraph (also see response to comment 30):

“For pixels with larger  $\chi^2$  as shown in Fig. 14, the forward model cannot fit the measured reflectance or DoLP well, which may be due to cloud contamination (Stap et al 2015), land, or residuals of glint. In scene 1, the top region with large  $\chi^2$  values is mostly due to the impact of thin cloud which is visible from Fig. 13. Larger residuals in the 870nm band between measurement and forward model are also observed. The retrieved AODs are over-estimated in this region. In scene 2, the region with  $\chi^2 > 3$  correlate closely with the thin clouds (Fig 13), which influence nearby AOD and Rrs retrievals. For scene 3,  $\chi^2$  becomes larger than 2 when close to the coast. This may be due to complex water properties which are not well represented by the open water bio-optical model used in the simulation

(Gao et al 2019). The pixels near the coast are also potentially impacted by the bottom effect and adjacency effect of land pixels.”

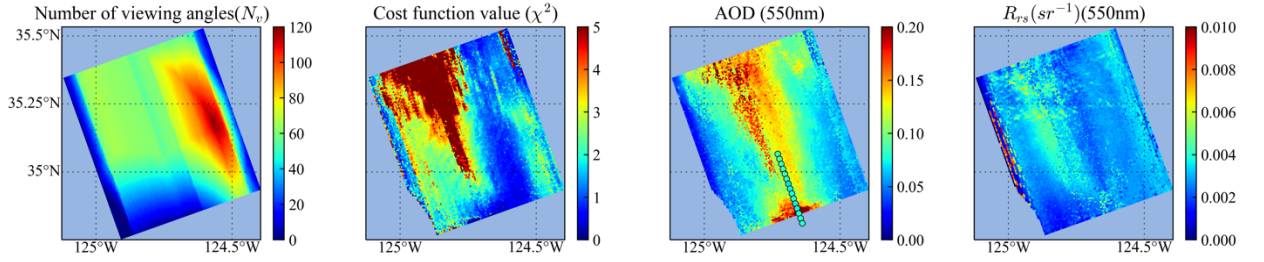

Fig. 15. The number of viewing angles used in the retrieval ( $N_v$ ), cost function value ( $\chi^2$ ), the retrieved AOD (550 nm) and Rrs (550nm) for all pixels in scene 1. The HSRL AODs at 532 nm are indicated by the colored dots in the AOD plot.

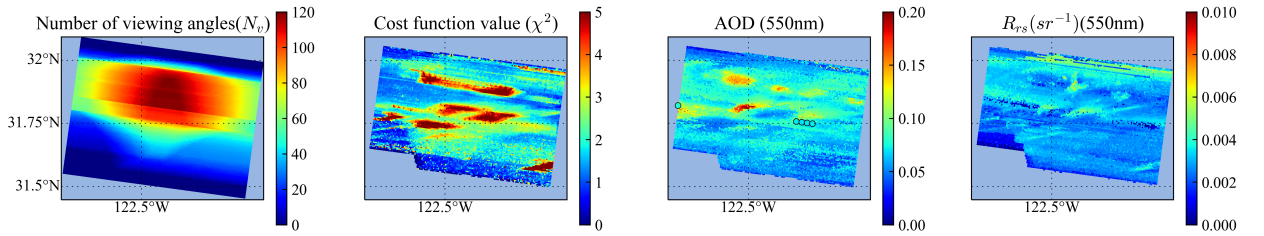

Figure 16. Same as Fig. 15 but for scene 2. For Rrs, viewing angles at least  $40^\circ$  away from the solar specular reflection direction are used to avoid sunglint as shown in Fig. 13.

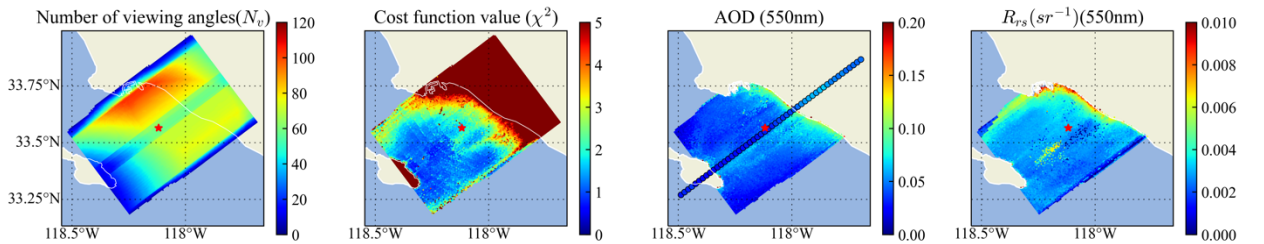

Figure 17. Same as Fig. 15 but for scene 3. The pixels with large  $\chi^2$  are influenced by the land (upper region) and island (lower left). The retrieved AOD and Rrs over land pixels are not shown. The location of the AERONET USC\_SEAPRISM site is indicated by a red star symbol.

29. P28, FIG15-17: If it is easy to add, it would be informative to include a fourth subplot with the retrieved Rrs in these figures.

Thank you for the suggestion. We have added the Rrs figures as shown above.

30. P29, FIG18-19: I'm struggling to see the value in these two figures given the very coarse across-track averaging. Why resolve along-track data at ~0.5km when averaging across-track at tens of km? In my mind, a better approach might be to average all pixels within a circle of some radius of the HSRL/AERONET/SeaPRISM measurements. Alternatively, these figures could be removed altogether, while still reporting the average values for each of the 3 scenes. (Much of the pixel-level information is already conveyed in figures 15-17).

Thank you for the suggestion. We agree with the reviewer, the original comparison is not ideal, but they are useful to make clear comparison with HSRL. To fix the above-mentioned issue, 1) we conducted new retrievals with a higher resolution, 2) pixels in the along track direction with 4x4 pixels are averaged, and 3) we kept most pixels with a broader criterion in the plots. Both Fig 18 and 19 are updated and shown below. Discussion for AOD are updated in the paragraph:

**“To compare with the HSRL AOD in the along track direction, the retrieved AOD (550nm) is averaged within a box of 2.2km x 2.2km (4 x 4 pixels). The averaged AOD (550nm) values and the corresponding standard deviations are shown in Fig. 18.** Pixels with  $N_v > 30$  and  $\chi^2 < 10$  are considered. The overall averaged values and their standard deviation are also computed and indicated in the plots. The averaged HSRL AODs are 0.079, 0.071 and 0.037 for scenes 1 to 3. The averaged retrieved AOD(550nm) are 0.096, 0.078 and 0.049 with relatively larger retrieval variation of 0.02 to 0.03. For scene 1, most  $\chi^2$  values are larger than 2, while for the other two scenes, most are less than 2 except for those pixels very close to cloud and coast. The retrieved AOD is larger than that of the HSRL by 0.03 in the overlapped region which may be influenced by the remaining effect of water condensation. In scene 2, the peaks of the retrieved AOD values correspond to the  $\chi^2$  values larger than 2, which are influenced by the nearby thin cloud. There are no overlapped pixels except the one associated with high AOD peaks, but the general trend of the retrieved AOD agrees with the HSRL results. For scene 3, the retrieved AOD values agree well with the HSRL AOD with an average difference less than 0.01 and  $\chi^2$  mostly less than 2. However when the pixels are close to the coast, both  $\chi^2$  and AOD increased significantly as discussed previously.”



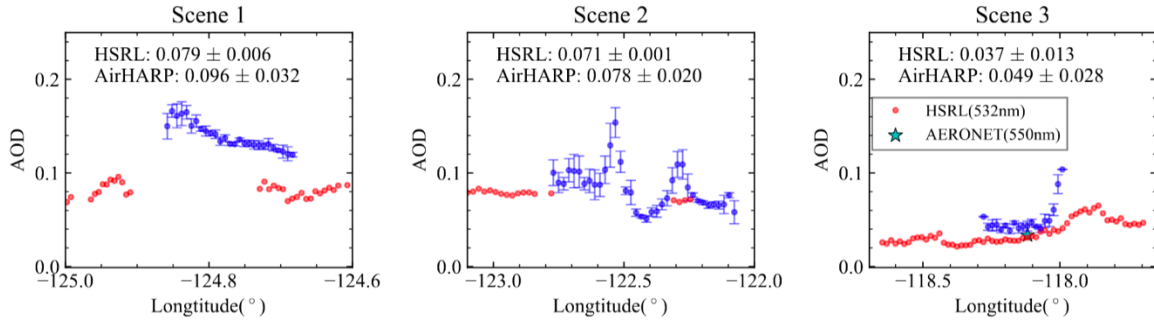

*Fig. 18 Comparison of the retrieved AOD (550 nm) from AirHARP measurement with the AOD (532 nm) from HSRL for Scenes 1 to 3. The AOD (550nm) from AERONET USC\_SeaPRISM site is shown in scene 3. The AirHARP retrieved AOD is averaged with 4x4 pixels (2.2km x2.2km). The averaged and standard deviations for both AirHARP retrievals and HSRL products are provided in the text. Pixels with  $N_v > 30$  and  $\chi^2 < 10$  are considered.*

Discussions for Rrs in Figure 19 are also updated:

“Fig. 19 shows the mean value and standard deviation of Rrs averaged in the same way as AOD discussed above. There is similar spatial variation between the retrieved Rrs and AOD. Pixels with large Rrs uncertainties are mostly associated with the large AOD uncertainties shown in Fig. 18. The Rrs values at 440nm for the three scenes are 0.0055, 0.0072, and 0.0030  $\text{sr}^{-1}$ , where the decrease of Rrs from scene 2 to scene 3 may be due to the increase of CDOM close to the coast as demonstrated in Fig. 5. Moreover, Rrs at scene 1 are likely to be under-estimated due to the large  $\chi^2$  and retrieved AOD over the center of scene 1. The averaged Rrs values at 550nm remain approximately constant with a value of 0.0003  $\text{sr}^{-1}$  over all three scenes. Rrs from AERONET USC\_SeaPRISM site are indicated in scene 3 of Fig 19 and also compared in Figure 20. ...”

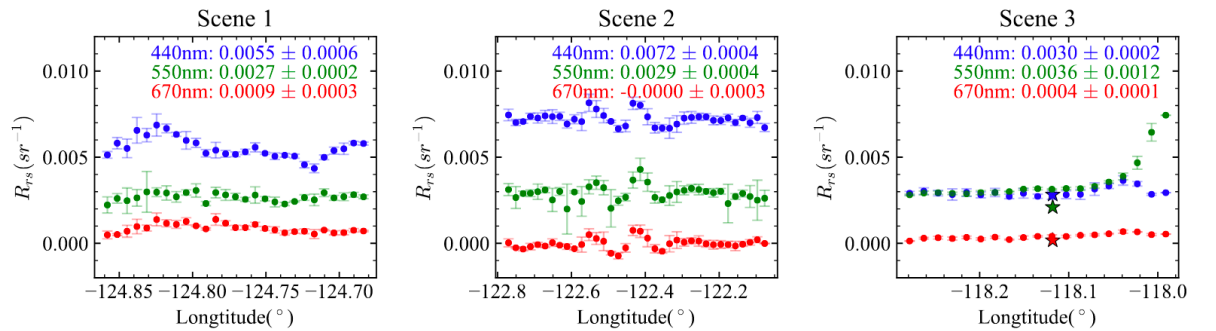

Figure 19. Similar to Fig. 18, the retrieved  $R_{rs}$  are computed for the AirHARP band of 440, 550, and 670nm bands. The averaged  $R_{rs}$  and its standard deviation are shown in the legends. For scene 3,  $R_{rs}$  from AERONET USC\_SeaPRISM site at wavelengths corresponding to AirHARP bands are indicated by the star symbols.

The comparison with the AERONET (Fig 20) is updated correspondingly:

“To better compare with AERONET results, we only considered the pixels with  $\chi^2 < 2$  and conducted the same averaging (4 x 4 pixels) around the USC\_SeaPRISM site for the retrieved AOD and  $R_{rs}$ . The averaged values and their standard deviations are plotted in Fig. 20. The overall retrieved AOD spectrum is similar to AERONET results with a difference smaller than 0.01. The results are similar to the retrieval results from the Research Scanning Polarimeter as reported by Gao et al. (2020). The retrieved  $R_{rs}$  agrees well with the AERONET  $R_{rs}$  with a difference less than  $0.001 \text{ sr}^{-1}$ . Note that this study is done with possible AirHARP measurement uncertainty of 3% in reflectance, which may impact atmospheric correction accuracy.”

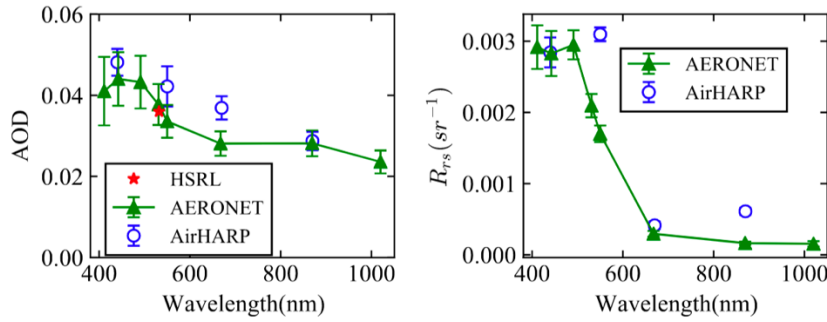

Fig 20: Comparisons of the AOD and  $R_{rs}$  from AirHARP retrievals with AERONET products. The retrieval results are averaged with  $4 \times 4$  pixels ( $2.2 \text{ km} \times 2.2 \text{ km}$ ) around the AERONET USC\_SeaPRISM site. This is similar to Fig. 5 and 19 with error bars indicating the standard deviations, but only pixels with  $\chi^2 < 2$  are considered. The AERONET AOD and  $R_{rs}$  spectra are taken from Oct 23, 2017 with the error bars indicating daily variations. HSRL AOD at 532nm is also shown.

31. P30, LN16: Was the speed up factor of FastMAPOL every specified? How long does a retrieval using equivalently accurate RT take with regular MAPOL on the same hardware?

Thank you for the questions. We added the information:

“Comparing to the retrieval speed of approximately 1 hour per pixel using conventional radiative transfer forward model, the computational acceleration is  $10^3$  times faster with CPU or  $10^4$  times with GPU processors.”

32. P21, LN12: I think the authors intend to say "...HARP2 is likely to have higher accuracy..."

Thank you. I believe the author is referring to P31. We have corrected the sentence.

Furthermore, we have provided the complete dataset from AirHARP retrievals with brief discussion in Sec 5:

“The complete retrieval results, including the aerosol microphysical properties, wind speed, Chla and atmospheric correction related datasets, are provided in *Data availability*. The retrieval uncertainties for aerosol microphysical properties are relatively large due to the small aerosol optical depths. Chla retrievals are sensitive to the aerosol retrievals, and are more challenging to retrieve accurately at small values as discussed in Sec 4. ”

# Efficient multi-angle polarimetric inversion of aerosols and ocean color powered by a deep neural network forward model

Meng Gao<sup>1,2</sup>, Bryan A. Franz<sup>1</sup>, Kirk Knobelspiesse<sup>1</sup>, Peng-Wang Zhai<sup>3</sup>, Vanderlei Martins<sup>3</sup>, Sharon Burton<sup>4</sup>, Brian Cairns<sup>5</sup>, Richard Ferrare<sup>4</sup>, Joel Gales<sup>1,6</sup>, Otto Hasekamp<sup>7</sup>, Yongxiang Hu<sup>4</sup>, Amir Ibrahim<sup>1,2</sup>, Brent McBride<sup>3,2</sup>, Anin Puthukkudy<sup>3</sup>, P. Jeremy Werdell<sup>1</sup>, and Xiaoguang Xu<sup>3</sup>

<sup>1</sup>NASA Goddard Space Flight Center, Code 616, Greenbelt, Maryland 20771, USA

<sup>2</sup>Science Systems and Applications, Inc., Greenbelt, MD, USA

<sup>3</sup>JCET/Physics Department, University of Maryland, Baltimore County, Baltimore, MD 21250, USA

<sup>4</sup>MS 475 NASA Langley Research Center, Hampton, VA 23681-2199, USA

<sup>5</sup>NASA Goddard Institute for Space Studies, New York, NY 10025, USA

<sup>6</sup>Science Applications International Corp., Greenbelt, MD, USA

<sup>7</sup>Netherlands Institute for Space Research (SRON, NWO-I), Utrecht, The Netherlands

**Correspondence:** Meng Gao (meng.gao@nasa.gov)

**Abstract.** NASA’s Plankton, Aerosol, Cloud, ocean Ecosystem (PACE) mission, scheduled for launch in the timeframe of 2023, will carry a hyperspectral scanning radiometer named the Ocean Color Instrument (OCI) and two Multi-Angle Polarimeters (MAP): the UMBC Hyper-Angular Rainbow Polarimeter (HARP2) and the SRON Spectro-Polarimeter for Planetary EXploration one (SPEXone). The MAP measurements contain rich information on the microphysical properties of aerosols and hydrosols, and therefore can be used to retrieve accurate aerosol properties for complex atmosphere and ocean systems. Most polarimetric aerosol retrieval algorithms utilize vector radiative transfer models iteratively in an optimization approach, which leads to high computational costs that limit their usage in the operational processing of large data volumes acquired by the MAP imagers. In this work, we propose a deep neural network (NN) [forward](#) model to represent the radiative transfer simulation of coupled atmosphere and ocean systems, for applications to the HARP2 instrument and its predecessors. Through the evaluation of synthetic datasets for AirHARP (airborne version of HARP2), the NN model achieves a numerical accuracy smaller than the instrument uncertainties, with a running time of 0.01s in a single CPU core or 1 ms in GPU. Using the NN as a forward model, we built an efficient joint aerosol and ocean color retrieval algorithm called FastMAPOL, evolved from the well-validated Multi-Angular Polarimetric Ocean coLoR (MAPOL) algorithm. Retrievals of aerosol properties and water leaving signals were conducted on both the synthetic data and the AirHARP field measurements from the Aerosol Characterization from Polarimeter and Lidar (ACEPOL) campaign in 2017. From the validation with the synthetic data and the collocated High Spectral Resolution Lidar (HSRL) aerosol products, we demonstrated that the aerosol microphysical properties and water leaving signals can be retrieved efficiently and within acceptable error. [Comparing to the retrieval speed using conventional radiative transfer forward model, the computational acceleration is  \$10^3\$  times faster with CPU or  \$10^4\$  times with GPU processors.](#) The FastMAPOL algorithm can be used to operationally process the large volume of polarimetric data acquired by PACE and other future Earth observing satellite missions with similar capabilities.

## 1 Introduction

Atmospheric aerosols are tiny particles suspended in the atmosphere, such as dust, sea salt, and volcanic ash, that play important roles in air quality (Shiraiwa et al., 2017; Li et al., 2017) and Earth's climate (Boucher et al., 2013). Aerosols influence the Earth's reflectivity directly through scattering and absorption of solar light, and indirectly through interactions with clouds.

5 The radiative forcing from aerosols is one of the main uncertainties in studies of global climate change (Boucher et al., 2013). When deposited into ocean waters, aerosols also contribute to the availability of nutrients needed for phytoplankton growth, and thereby influence ocean ecosystems (Westberry et al., 2019). Accurate knowledge of aerosol optical properties is also important for atmospheric correction in ocean color remote sensing, wherein the spectral water leaving radiances are retrieved by subtracting the contributions of the atmosphere and ocean surface from the spaceborne or airborne measurements made at the top  
10 of atmosphere (Mobley et al., 2016). The resulting water leaving signals provide valuable information to derive biogeochemical quantities for monitoring the global ocean ecosystem (Dierssen and Randolph, 2013), and quantifying ocean biochemical processes (Platt et al., 2008). Accurate assessments of aerosol optical and microphysical properties are thus important for both atmospheric and oceanic studies.

Multi-angle polarimeters (MAPs) measure polarized light at continuous or discrete spectral bands and at multiple viewing  
15 angles, providing rich information on aerosol optical and microphysical properties (Mishchenko and Travis, 1997; Chowdhary et al., 2001; Hasekamp and Landgraf, 2007; Knobelspiesse et al., 2012). The Polarization and Directionality of the Earth's Reflectance (POLDER) instrument pioneered the spaceborne MAP, which was hosted on Advanced Earth Observing Satellite missions (ADEOS-I; 1996-1997 and ADEOS-II; 2002-2003), and Polarization and Anisotropy of Reflectances for Atmospheric Sciences Coupled with Observations from a Lidar (PARASOL; 2004-2013) mission (Tanré et al., 2011). The Hyper-Angular  
20 Rainbow Polarimeter (HARP) CubeSat, a small satellite with 3U volume, was launched from the International Space Station on February of 2020 and has captured scientific images (UMBC Earth and Space Institute). ~~There are several satellite missions with MAP instruments~~ Several satellite missions plan to carry MAP instruments, which are scheduled to be launched in the time frame of 2023-2024, including ~~ESA~~ the European Space Agency (ESA)'s Multi-viewing Multi-channel Multi-polarisation Imager (3MI) (~~Fougnie et al., 2018~~) and ~~NASA~~ on board the Metop-SG satellites (Fougnie et al., 2018), the National Aeronautics  
25 and Space Administration (NASA)'s Multi-Angle Imager for Aerosols (MAIA) (Diner et al., 2018) and Plankton, Aerosol, Cloud, ocean Ecosystem (PACE) (Werdell et al., 2019) missions. A thorough review of the MAP instruments and algorithms can be found in Dubovik et al. (2019).

The PACE mission will carry a hyperspectral scanning radiometer named the Ocean Color Instrument (OCI) and two MAPs: a next generation UMBC (University of Maryland, Baltimore County) Hyper-Angular Rainbow Polarimeter (HARP2) (Martins  
30 et al., 2018), and the SRON (Netherlands Institute for Space Research) Spectro-Polarimeter for Planetary EXploration one (SPEXone) (Hasekamp et al., 2019a). OCI will provide continuous spectral measurements from the ultraviolet (340 nm) to near-infrared (890 nm) with Full Width Half Maximum of 5 nm resolution and sampling every 2.5 nm, plus a set of seven discrete shortwave infrared (SWIR) bands centered at 940, 1038, 1250, 1378, 1615, 2130, and 2260 nm. SPEXone performs multiangle measurements at 5 along track viewing angles of  $0^\circ$ ,  $\pm 20^\circ$  and  $\pm 58^\circ$ , with a surface swath of 100km, and a

continuous spectral range spanning 385-770 nm at resolutions of 2-3 nm for intensity and 10-40 nm for polarization (Rietjens et al., 2019). HARP2 is a wide field-of-view imager that measures the polarized radiances at 440, 550, 670, and 870 nm, where the 670 nm band will measure 60 viewing angles and the other bands 10 viewing angles, with a swath of 1,556 km at nadir on the Earth surface. To facilitate cross calibrations and validations, a PACE Level-1C common data format has been developed, with the purpose of projecting all three PACE instruments onto an uniform spatial grid (Plankton, Aerosol, Cloud, ocean Ecosystem (PACE) mission, 2020). The PACE instruments will provide an unprecedented opportunity to improve the characterization of the atmosphere and ocean states (Remer et al., 2019a, b; Frouin et al., 2019).

To retrieve the aerosol information from polarimetric measurements over oceans, several advanced aerosol retrieval algorithms have been developed for both airborne and spaceborne MAPs, such as POLDER/PARASOL(Hasekamp et al., 2011; Dubovik et al., 2011, 2014; Li et al., 2019; Hasekamp et al., 2019b; Chen et al., 2020), the Airborne Multiangle SpectroPolarimetric Imager (AirMSPI) (Xu et al., 2016, 2019), SPEX Airborne (the airborne version of SPEXone ) (Fu and Hasekamp, 2018; Fu et al., 2020; Fan et al., 2019), the Research Scanning Polarimeter (RSP) (Chowdhary et al., 2005; Wu et al., 2015; Stamnes et al., 2018; Gao et al., 2018, 2019, 2020), the Directional Polarimetric Camera (DPC)/GaoFen-5 (Wang et al., 2014; Li et al., 2018). The retrieval algorithms are mostly based on iterative optimization approaches that utilize vector radiative transfer (RT) models as the forward model. The high computational cost of the RT simulations pose great challenges in the operational processing of the large data volumes acquired by the MAP imagers. To alleviate this issue, the SPEX team represented the polarimetric reflectance for an open ocean system using a deep neural network (NN) and coupled it with a radiative transfer model for the atmosphere (Fan et al., 2019). This hybrid forward model avoids the direct calculation of the scattering and absorption properties inside the ocean, and still maintains high accuracy, therefore enabling sufficient efficiency for SPEX-one data retrieval. For coastal waters, Mukherjee et al. (2020) developed a NN model to predict the polarimetric reflectance associated with complex water optical properties. This NN model can be combined with a flexible atmosphere model for MAP aerosol retrievals over complex waters.

For non-polarimetric remote sensing studies, several NN approaches have been developed to derive aerosol and ocean properties simultaneously (Fan et al. (2017); Shi et al. (2020) and ~~reference~~<sup>references</sup> within). Fan et al. (2017) developed NN models to directly invert the aerosol optical depth (AOD) and remote sensing reflectance  $R_{rs}(\lambda)$  ( $sr^{-1}$ ) from the NASA Moderate Resolution Imaging Spectroradiometer (MODIS) measurements. Shi et al. (2020) developed a NN radiative transfer scheme for coupled atmosphere and ocean systems including both open and coastal waters, which is then applied in an optimal estimation algorithm for the Cloud and Aerosol Imager-2 (CAI-2) hosted on the Greenhouse gases Observing Satellite-2 (GOSAT-2).

A number of NN models have been developed to directly invert the aerosol microphysical properties from MAP measurements. Di Noia et al. (2015) discusses the NN employed to retrieve aerosol refractive index, size, and optical depth (AOD) from GroundSPEX (a ground version of SPEX instrument) measurements. Di Noia et al. (2017) developed a NN inversion method for airborne MAP measurement over land from RSP. In both works, the results from the NN inversion are further used as initial values for iterative optimization, and both efficiency and the retrieval accuracy are shown to be improved. Using NN to conduct

direct inversion is efficient, but it is often viewed as a black box and it is difficult to account for measurement uncertainties. The combination of a NN inversion with an iterative optimization method shows promise for MAP retrievals.

Even with such ample progress, it is still challenging for current state-of-the-art algorithms to process MAP data operationally through iterative optimization. In this work, we present a joint retrieval algorithm for aerosol properties and water leaving signals that uses a deep NN model to replace the radiative transfer forward model for simulation of the polarimetric reflectances. This approach is one step further than ~~(Fan et al., 2019)~~[Fan et al. \(2019\)](#), as both the atmospheric and oceanic radiative transfer processes are represented by the NN. The NN forward model is then used in an iterative retrieval algorithm that is significantly more computationally efficient than approaches that use traditional radiative transfer. The benefits of using a NN model as the forward model in retrieval algorithms can be summarized as follows with details provided in later sections:

- Fast: NN models ~~mostly~~ involve matrix operations that can be evaluated efficiently.
- Accurate: Given sufficient training data volumes and accuracies, NN models can be trained with high precision.
- Differentiable: The Jacobian matrix of NN models can be represented analytically and therefore further improves efficiency and accuracy in retrievals.
- Transferable: The parameters of a NN can be exported and implemented into existing retrieval algorithms.

The retrieval algorithm we developed is called FastMAPOL, which is evolved from the well-validated Multi-Angular Polarimetric Ocean coLoR (MAPOL) algorithm (Gao et al., 2018, 2019, 2020) by replacing its forward model with NN models. To validate the retrieval algorithm, we applied FastMAPOL to both synthetic and field measurements from AirHARP (the airborne version of HARP2 and HARP CubeSat) for the Aerosol Characterization from Polarimeter and Lidar (ACEPOL) campaign in 2017 (Knobelspiesse et al., 2020). The synthetic AirHARP data is a supplement of the field measurements with a wider range of aerosol and ocean optical properties, and solar and viewing geometries. The AOD derived from coincident High Spectral Resolution Lidar (HSRL, Hair et al. (2008)) and Aerosol Robotic Network (AERONET, Holben et al. (1998)) measurements are used to evaluate the performance of the AOD retrieval from the AirHARP field measurements. Using the retrieved aerosol properties, atmospheric correction is applied to the AirHARP measurements to derive the water leaving signal at four AirHARP bands. The retrieved aerosol products from MAP can also assist hyperspectral atmospheric correction on instruments such as PACE OCI as previously demonstrated using the aerosol properties retrieved from RSP and hyperspectral measurements from SPEX Airborne ~~(Gao et al., 2020; ?)~~[\(Gao et al., 2020; Hannadige et al., 2021\)](#). Retrieval uncertainties of both aerosol and water leaving signals under various aerosol loadings are also discussed in this study. The retrieval algorithm powered by the NN forward model provides a practical approach for operational applications of polarimetric aerosol and ocean color retrieval for PACE, and other satellite missions that utilize polarimeters in the retrieval of geophysical properties from Earth observations.

The paper is organized into seven sections: Sect. 2 reviews the retrieval algorithm and its radiative transfer forward model, Sect. 3 discusses the training and accuracy of the NN forward model, Sec 4. applies the NN forward model to aerosol and water leaving signal retrievals from the synthetic AirHARP data, Sect. 5. discusses the retrievals on AirHARP field measurements from ACEPOL campaign, Sect. 6 and 7 provide discussions and conclusions.



## 2 Joint aerosol and ocean color retrieval algorithm

In this section, we will discuss the MAPOL retrieval algorithm based on multi-angle polarimetric measurements and the associated radiative transfer forward model. The retrieval algorithm ~~have~~has been validated using both synthetic data (Gao et al., 2018) and RSP field measurements (Gao et al., 2019, 2020). To apply the retrieval algorithm to AirHARP measurements,

5 we will first discuss the AirHARP instrument characteristics.

AirHARP measures the total and linearly polarized radiance at 60 viewing angles at the 660 nm band, and at 20 viewing angles at the 440, 550, and 870 nm bands. Different from AirHARP, HARP2 reduces the number of viewing angles to 10 at 440, 550, and 870 nm, and maintains 20 viewing angles at 660 nm, in order to fulfill the bandwidth requirement and preserve information content as much as possible. HARP instruments (AirHARP, HARP CubeSat, and HARP2) use a modified three-  
10 way Phillips prism located after the front lens to split the incident light into the three orthogonal linear polarization states ( $0^\circ$ ,  $45^\circ$ , and  $90^\circ$ ), which can be recombined to obtain the Stokes parameters  $L_t$ ,  $Q_t$ , and  $U_t$  at the ~~aircraft~~observational altitude (Puthukkudy et al., 2020). Circular polarization (Stokes parameter V) is not measured by any of the polarimeters in ACEPOL as it is negligible for atmospheric studies (Kawata, 1978). We use the total measured reflectance ( $\rho_t(\lambda)$ ) and DoLP ( $P_t(\lambda)$ ) at the height of the aircraft with spectral dependencies hereafter implied, which are defined as

$$15 \quad \rho_t = \frac{\pi r^2 L_t}{\mu_0 F_0}, \quad (1)$$

$$P_t = \frac{\sqrt{Q_t^2 + U_t^2}}{L_t}, \quad (2)$$

where  $F_0$  is the extraterrestrial solar irradiance,  $\mu_0$  is the cosine of the solar zenith angle,  $r$  is the Sun-Earth distance correction factor in astronomical units.

Based on the MAP measurements, the MAPOL retrieval algorithm is developed to derive both the aerosol properties and  
20 the water leaving signal simultaneously. The retrieval algorithm minimizes the difference between the MAP measurements and the forward model simulations computed from vector radiative transfer simulations (Zhai et al., 2009, 2010). By assuming the measurement and modeling uncertainties follow Gaussian statistical distributions, the retrieval parameters can be estimated through Bayesian theory using the cost function  $\chi^2$  to quantify the difference between the measurement and the forward model simulation (Rogers, 2000):

$$25 \quad \chi^2(\mathbf{x}) = \frac{1}{N} \sum_i \left( \frac{[\rho_t(i) - \rho_t^f(\mathbf{x}; i)]^2}{\sigma_\rho^2(i)} + \frac{[P_t(i) - P_t^f(\mathbf{x}; i)]^2}{\sigma_P^2(i)} \right) \quad (3)$$

where  $\rho_t$  and  $P_t$  are the measured reflectance and DoLP as defined in Eqs. (1) and (2), and  $\rho_t^f$  and  $P_t^f$  are the corresponding quantities computed from the forward model. The state vector  $\mathbf{x}$  contains all retrieval parameters, such as the aerosol size, refractive indices; the subscript  $i$  stands for the index of the measurements at different viewing angles and wavelengths; and  $N$  is the total number of the measurements used in the retrieval. For AirHARP measurements, the maximum value of  $N$  is  
30 120 considering all the viewing angles from the four bands. The total uncertainties of the reflectance and DoLP used in the algorithm are denoted as  $\sigma_\rho$  and  $\sigma_P$ , which are contributed by both the measurement uncertainties  $\sigma_m$  and the forward model

uncertainties  $\sigma_f$  (more details in Sect). 3.3:

$$\sigma_\rho^2 = \sigma_{\rho,m}^2 + \sigma_{\rho,f}^2 \quad (4)$$

$$\sigma_P^2 = \sigma_{P,m}^2 + \sigma_{P,f}^2 \quad (5)$$

One important component of  $\sigma_m$  is the calibration uncertainty. AirHARP was calibrated in the lab with an accuracy of 3-5 % for reflectance, and 0.005 for DoLP (McBride et al., 2019). In-flight uncertainty for the AirHARP DoLP is conservatively estimated to be at most 0.01 without an onboard calibrator. In this study, we adopted the calibration uncertainty for reflectance as  $\sigma_{\rho,cal} = 3\% \rho_t$  and for DoLP as  $\sigma_{P,cal} = 0.01$  for all four bands. The accuracy of the HARP CubeSat and HARP2 measurements can be further improved through onboard calibration (McBride et al., 2020; Puthukkudy et al., 2020). ~~AirHARP conducted high spatial resolution measurements with a grid size of 55 m. We averaged every 10x10 pixels together (a box of 550m  $\times$  550 m). The standard deviations of the pixels within the box are used to estimate the random noise and the~~ In this study, we considered the total measurement uncertainties as the contributions only from the calibration ( $\sigma_{cal}$ ):

$$\sigma_m = \sigma_{cal} \quad (6)$$

~~However, other contributions such as spatial variability of the geophysical properties ( $\sigma_{avg}$ ). To account for the total may also contribute to the measurement uncertainties, we considered the contributions from both the calibration ( $\sigma_{cal}$ ) and pixel averaging ( $\sigma_{avg}$ ) as-~~

$$\sigma_m^2 = \sigma_{cal}^2 + \sigma_{avg}^2$$

~~for both reflectance and DoLP which will be discussed in Sec 5. Furthermore, noise correlation is an import influence on the retrieval accuracy (Knobelspiesse et al., 2012) that is ignored in this study due to the lack of knowledge on this characteristic for AirHARP.~~

As observed by AirHARP (Puthukkudy et al., 2020) and RSP measurements (Gao et al., 2020), the sunglint angular pattern cannot be well modeled by an isotropic Cox-Munk model. Using these data will require characterization of the corresponding measurement and model uncertainties. To minimize the impact of sunglint in our discussions, we removed the signals within an angle range of 0° to 40° relative to the solar specular reflection direction. ~~Furthermore, noise correlation is an import influence on the retrieval accuracy (Knobelspiesse et al., 2012) that is ignored in this study due to the lack of knowledge on this characteristic for AirHARP.~~

The forward model uncertainties  $\sigma_f$  include the ~~numerical accuracy uncertainties~~ of the radiative transfer calculation, and ~~can include any estimation of~~ uncertainties due to the incompleteness of the model to describe the system. ~~For convenience, as discussed~~ However, the latter one is difficult to quantify; we will discuss the possible sources for it in the next section. For convenience, we will only consider the ~~uncertainty uncertainties~~ of the NN forward model ( $\sigma_{NN}$ ) and the ~~numerical accuracy~~ of the radiative transfer simulation used for generating the NN training data ( $\sigma_{RT}$ ) ~~as~~ as

$$\sigma_f^2 = \sigma_{RT}^2 + \sigma_{NN}^2. \quad (7)$$

$\sigma_{NN}$  is evaluated by comparing with synthetic multi-angle AirHARP measurements discussed in Sect. 3.3.

To fully utilize the information contained in the AirHARP measurements, the forward model needs to achieve an accuracy level much better than the measurement uncertainties. This becomes the goal of the NN training in the next section, to reproduced the forward model within an error that is much less than the measurement uncertainty. Detailed comparisons of the forward model uncertainties and the measurement uncertainties will be provided in the next section. To minimize the cost function defined in Eq. (3), we use an optimization method, called the Subspace Trust-region Interior Reflective (STIR) approach (Branch et al., 1999) as implemented in the Python SciPy package (Virtanen et al., 2020), to solve the state parameters  $x$  iteratively. The method is based upon the Levenberg-Marquart method (Moré, 1978) and shows good stability for the boundary constraints.

## 2.1 Forward model

We used a vector radiative transfer model based on the successive order of scattering method for coupled atmosphere and ocean systems (Zhai et al., 2009, 2010) to model the measured reflectance and DoLP. The atmosphere is configured as three layers: a top molecular layer above the aircraft ~~with only trace gas presented~~, a molecular layer below the aircraft in the middle, and an aerosol and molecular mixing layer on the bottom ~~(assumed uniformly distributed within with a height of 2 km from the ground) (Gao et al., 2019)~~ km. Aerosols are assumed to be uniformly distributed in the mixing layer as shown in the left panel of Fig. 1. The same vertical structure of the atmosphere was successfully used in the inversion of RSP data (Gao et al., 2019, 2020).

The atmospheric surface pressure is assumed to be one standard atmosphere pressure, which is consistent with the value discussed in Sec 5. Anisotropic molecular Rayleigh scatterings are accounted Hansen and Travis (1974). The molecular absorption properties are computed by the hyperspectral line-by-line atmospheric radiative transfer simulator (ARTS) (Buehler et al., 2005) with the molecular absorption parameters of oxygen, water vapor, methane, and carbon dioxide from the HITRAN database (Gordon et al., 2017). The gas absorption of ozone and nitrogen dioxide are from Gorshchev et al. (2014); Serdyuchenko et al. (2014); Bogdanov et al. (2014), respectively. The hyperspectral absorption coefficients are then averaged within the instrument spectral response function and used in the multiple scattering radiative transfer simulation (Zhai et al., 2009, 2010, 2018). The molecular profile used is the US standard atmospheric constituent profiles (Anderson et al., 1986). Ozone is the most important gas that influences the absorption transmittance at the AirHARP bands of 550nm and 660nm. For the application to AirHARP measurements in ACEPOL, we use the ozone column density as a free parameter with values from the Modern-Era Retrospective analysis for Research and Applications, Version 2 (MERRA-2) developed by NASA's Global Modeling and Assimilation Office (Gelaro et al., 2017) to rescale the molecular absorption optical depth calculated under the above-mentioned standard atmospheric profile.

Aerosols are diverse in size, composition, and morphology. To capture their variation in the atmosphere, we modeled the size and refractive index for both fine and coarse modes. The aerosol size is represented by the volume density distribution as a combination of five lognormal distributions:

$$\frac{dV(r)}{d\ln r} = \sum_{i=1}^5 \frac{V_i}{\sqrt{2\pi}\sigma_{v,i}} \exp \left[ -\frac{(\ln r - \ln r_{v,i})^2}{2\sigma_{v,i}^2} \right] \quad (8)$$

where  $V_i$  is the column volume density for each submode, the mean radius  $r_i$  and standard deviation  $\sigma_i$  are fixed with values of 0.1, 0.1732, 0.3, 1.0, 2.9  $\mu m$ , and 0.35, 0.35, 0.35, 0.5, 0.5 respectively (Dubovik et al., 2006; Xu et al., 2016). The first three submodes are categorized as the fine mode aerosol, while the last two submodes are the coarse mode. All aerosols are assumed to be spherical in the current forward model. The nonspherical particle shape is important in the aerosol model (Dubovik et al., 2006), and will be considered in future studies. The aerosol refractive index spectra for the fine and coarse modes are represented by the principal component analysis in MAPOL (Wu et al., 2015; Gao et al., 2018) as

$$m(\lambda) = m_0 + \alpha_1 p_1(\lambda), \quad (9)$$

where  $p_1(\lambda)$  is the first-order principal component computed from the aerosol refractive index dataset including water, sea salt, dust-like particles, biomass burning, soot, sulfate, water-soluble, and industrial aerosols (Shettle and Fenn, 1979; d'Almeida et al., 1991).  $m_0$  and  $\alpha_1$  are two coefficients to determine the spectrum. For the application to AirHARP bands,  $p_1(\lambda)$  for the real part of the refractive index is approximately spectral flat for both the fine and coarse mode aerosols within the ~~visible spectrum~~AirHARP spectral range. We further assume the spectral shape for the imaginary refractive spectra is also flat. ~~Therefore, the two~~Two parameters can be combined into one to represent the refractive index. ~~In this study, only~~Hereafter, we only refer one independent parameter for each refractive index spectrum. Therefore, only four independent parameters are ~~used~~required to determine the real and imaginary refractive index spectra for the fine and coarse modes. With the aerosol size and refractive index, the polarimetric single scattering properties are modeled by the Lorenz-Mie theory and computed by the code developed by Mishchenko et al. (2002).

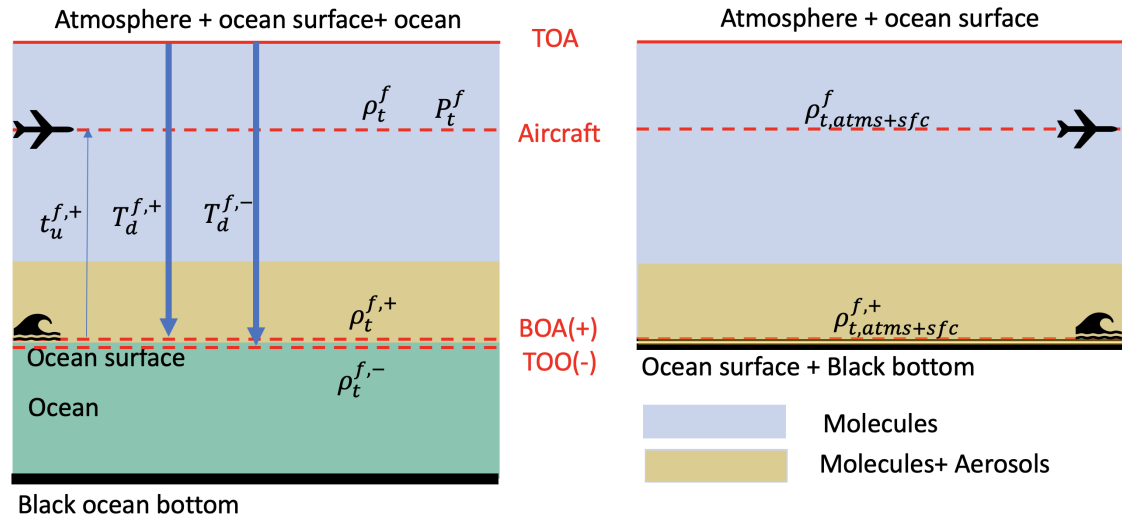

**Figure 1.** The left panel shows the coupled atmosphere and ocean system used in FastMAPOL including the atmosphere, ocean surface, and ocean body. The right panel represents a system used for atmospheric correction which only has atmosphere and ocean surface without scattering in the ocean body. The atmospheres in both systems are modeled as the same three layers. TOA indicates the top of the atmosphere. The bottom of the atmosphere (BOA) and the top of the ocean (TOO) indicate the locations just above and below the ocean surface, respectively. As discussed in the next section, all quantities shown in the figures need to be computed from the forward model and represented by the NN for efficient calculations. Symbols are defined in Table 1.

**Table 1.** Definition of the symbols for the quantities computed from the forward model (indicated by the superscript f) as shown in Fig. 1.

| Symbols                   | Definition                                                              |
|---------------------------|-------------------------------------------------------------------------|
| $\rho_t^f$                | Reflectance at the aircraft level, Eq. (1)                              |
| $P_t^f$                   | DoLP at the aircraft level, Eq. (2)                                     |
| $\rho_t^{f,+}$            | Reflectance at BOA                                                      |
| $\rho_t^{f,-}$            | Reflectance at TOO                                                      |
| $\rho_{t,atms+sfc}^f$     | Reflectance at the aircraft level for atmosphere and ocean surface only |
| $\rho_{t,atms+sfc}^{f,+}$ | Reflectance at BOA for atmosphere and ocean surface only                |
| $T_d^{f,+}$               | Irradiance transmittance from TOA to BOA, Eq. (12)                      |
| $T_d^{f,-}$               | Irradiance transmittance from TOA to TOO                                |
| $t_u^{f,+}$               | Radiance transmittance from BOA to sensor, Eq. (13)                     |

The molecular absorption properties are computed by a hyperspectral radiative transfer simulation (Zhai et al., 2009, 2010, 2018) including contributions from ozone, oxygen, water vapor, nitrogen dioxide, methane, and carbon dioxide under the US standard atmospheric constituent profiles (Anderson et al., 1986). Ozone is the most important gas that influences the absorption transmittance at the AirHARP bands of 550nm and 660nm. For the application to AirHARP measurements in ACEPOL, we

~~use the ozone column density as a free parameter with values from the Modern-Era Retrospective analysis for Research and Applications, Version 2 (MERRA-2) developed by NASA's Global Modeling and Assimilation Office (Gelaro et al., 2017) to re-scale the molecular absorption optical depth calculated under the above-mentioned standard atmospheric profile.~~

For the ocean layer shown in Fig. 1, two ocean bio-optical models are implemented in the forward model of MAPOL:  
 5 one with chlorophyll-a concentration (Chla;  $mgm^{-3}$ ) as the single parameter applicable to open ocean optical properties, and the other with seven parameters more suitable to fully describe complex coastal waters (Gao et al., 2019). Since the waters are ~~mostly~~ generally clear within the ocean scenes in this study (Gao et al., 2020), open ocean model is used for both NN training and retrievals. The optical properties of open ocean waters include contributions from pure seawater, colored dissolved organic matter (CDOM), and phytoplankton, where the CDOM and phytoplankton absorption coefficients, and phytoplankton  
 10 scattering coefficient and phase function are parameterized by Chla (Gao et al., 2019). Complex coastal water model for NN trainings will be investigated in future-a separated studies. The ocean surface roughness is modeled by the isotropic Cox-Munk model with a scalar wind speed. White cap is not considered in current study.

In summary, the parameters used to represent the forward model include five volume densities (one for each submode), four independent parameters for the refractive indices of fine and coarse modes, one parameter for wind speed, ozone column  
 15 density, and Chla. Three additional geometric parameters are used to set up the system, including the solar zenith angle, viewing zenith angle, and relative viewing azimuth angle. Therefore, it requires a total of 15 parameters to conduct the radiative transfer calculation, with a total of 11 independent state parameters that can be retrieved from optimizing the cost function as defined in Eq. (3).

## 2.2 Remote sensing reflectance

20 An important task for the joint retrievals is to obtain the water leaving signal, which is often represented in ocean color studies by the spectral remote sensing reflectance defined as  $R_{rs} = L_w^+ / E_d^+$  where  $E_d^+$  is the downwelling irradiance and  $L_w^+$  is the water leaving radiance just above the ocean surface (Mobley et al., 2016). The remote sensing reflectance can be derived from the water leaving reflectance reaching the sensor ( $\rho_w$ ) via:

$$R_{rs} = \left[ \frac{\rho_w(\theta_0, \theta_v)}{\pi r^2} \frac{\rho_w(\theta_0, \theta_v, \phi_v)}{\pi r^2} \right] \times \left[ \frac{C_{BRDF}(\theta_0, \theta_v)}{T_d^{f,+}(\theta_0) t_u^{f,+}(\theta_0, \theta_v)} \frac{C_{BRDF}(\theta_0, \theta_v, \phi_v)}{T_d^{f,+}(\theta_0) t_u^{f,+}(\theta_0, \theta_v, \phi_v)} \right]. \quad (10)$$

25 where  $\theta_0$  and  $\theta_v$  are the solar and viewing zenith angles,  $\phi_v$  is the relative viewing azimuth angle.  $\rho_w$  represents the signals originating from scattering in the ocean that reached the sensor, which can be derived from the atmospheric correction process as

$$\rho_w(\theta_0, \theta_v, \phi_v) = \rho_t(\theta_0, \theta_v, \phi_v) - \rho_{t,atm+sf}^f(\theta_0, \theta_v, \phi_v) \quad (11)$$

where  $\rho_t$  is the measured total reflectance as defined in Eq. (1) and  $\rho_{t,atm+sf}^f$  is the reflectance from a system with only  
 30 atmosphere and ocean surface (Mobley et al., 2016) as represented in the right panel of Fig. 1. The same formalism has been used to derive  $R_{rs}$  from RSP measurements Gao et al. (2019, 2020).

The downwelling irradiance transmittance  $T_d^f$  is for the solar irradiance from TOA to the surface, and the upwelling radiance transmittance  $t_u^{f,+}$  is for the water leaving radiance from BOA to the sensor (Gao et al., 2019). Both  $T_d^f$  and  $t_u^{f,+}$  are denoted in Fig. 1 and represented as follows:

$$T_d^{f,+}(\theta_0) = \frac{E_d^{f,+}(\theta_0)}{\mu_0 F_0} \quad (12)$$

$$t_u^{f,+}(\theta_0, \theta_v, \phi_v) = \left( \frac{\rho_t^f(\theta_0, \theta_v) - \rho_{t,atm+sf}^f(\theta_0, \theta_v)}{\rho_t^{f,+}(\theta_0, \theta_v) - \rho_{t,atm+sf}^{f,+}(\theta_0, \theta_v)} \frac{\rho_t^f(\theta_0, \theta_v, \phi_v) - \rho_{t,atm+sf}^f(\theta_0, \theta_v, \phi_v)}{\rho_t^{f,+}(\theta_0, \theta_v, \phi_v) - \rho_{t,atm+sf}^{f,+}(\theta_0, \theta_v, \phi_v)} \right) \quad (13)$$

where  $\rho_t^{f,+}$ ,  $\rho_{t,atm+sf}^{f,+}$  are reflectance just above ocean surface also denoted in Figure 1 and Table 1.

To remove the dependency of  $R_{rs}$  on the solar and viewing geometries, a BRDF correction  $C_{BRDF}$  is applied to adjust  $R_{rs}$  to the observation with a zenith sun and a nadir viewing direction as defined by Morel et al. (2002):

$$C_{BRDF}(\theta_0, \theta_v, \phi_v) = \frac{\Re_o(W)}{\Re(\theta'_v, W)} \frac{\Re_o(W)}{\Re(\theta'_v, \phi_v, W)} \times \frac{\rho_t^{f,-}(0,0)}{T_d^{f,-}(0)} \left[ \frac{\rho_t^{f,-}(\theta_0, \theta'_v)}{T_d^{f,-}(\theta_0)} \frac{\rho_t^{f,-}(\theta_0, \theta'_v, \phi_v)}{T_d^{f,-}(\theta_0)} \right]^{-1}. \quad (14)$$

where  $\Re_o/\Re$  accounts for reflection and refraction effects when light propagates through the ocean interface.  $(\theta'_v, \phi_v)$  is the direction of the upwelling radiance beneath the sea surface, where  $\theta'_v$  is defined through Snell's law:

$$\sin \theta'_v = \sin \theta_v / n_w, \quad (15)$$

with water refractive index  $n_w$ .  $C_{BRDF}$  in its original form is defined using the radiance and irradiance just below the ocean surface (Morel et al., 2002), here we have converted all quantities into the radiance reflectance  $\rho_t^{f,-}$  and the irradiance transmittance  $T_d^{f,-}(\theta_0)$  similar to Eqs. (1) and (12). In our study, of AirHARP retrievals of

To compute the remote sensing reflectance from the multi-angle AirHARP measurement, we only consider the minimum viewing angle at each wavelength which is less than  $1^\circ$ , the contribution of the  $\Re$  factor is ignored due to its small angular variations (Morel and Berthon, 1989) reflectance at the minimum viewing zenith angle for each wavelength and apply the atmospheric correction and BRDF correction as discussed above. For  $\theta'_v < 15^\circ$  ( $\theta_v < 20^\circ$ ), the  $\Re_o/\Re$  factor is approximately to a constant value of 1, but for larger  $\theta_v$  angles, the ratio increases with both wind speed and  $\theta_v$  (Morel and Gentili, 1996; Morel et al., 2002). In this study we ignored the  $\Re_o/\Re$  factor in Eq. 14, which will not impact  $R_{rs}$  calculation from synthetic data due to the small viewing zenith angle used, but may cause underestimation of  $R_{rs}$  at the edge of the image, as will be discussed in Sec 4 and 5. All quantities denoted in Fig 1 need to be determined for the forward model and the calculation of remote sensing reflectance, and will be represented by NN models.

### 3 Neural network for forward model

Deep NN models are developing rapidly due to the advancement in machine learning infrastructure and demands in broad applications (Goodfellow et al., 2016), and are demonstrated to be efficient in approximating physical functions (Lin et al.,



2017). In this study, we employed the deep feed-forward NN (Goodfellow et al., 2016) to represent the MAP measurements. In this section, we will discuss the procedures to train the NN forward ~~model for AirHARP measurements, with its models for reflectance and DoLP respectively, with their~~ performance evaluated.

### 3.1 Training data

- 5 To train a NN that can represent the forward model accurately for the AirHARP measurements from the ACEPOL field campaign, we generated the training data according to the average aircraft height of 20.1km on the day of 10/23/2017 from ACEPOL. We simulated 21,000 cases according to the forward model as discussed in the previous section by considering general aerosol and ocean properties, as well as a large range of solar and viewing geometries with the minimum and maximum values of all parameters summarized in Table 2. The range of solar zenith angle  $\theta_0$ , viewing zenith angle  $\theta_v$ , and relative
- 10 viewing azimuth angle  $\phi_v$  are from  $0^\circ$  to  $70^\circ$ ,  $60^\circ$  and  $180^\circ$ , respectively. The reflectance and DoLP with a viewing azimuth angle larger than  $180^\circ$  can be evaluated by the corresponding value less than  $180^\circ$  due to symmetry with respect to the principal plane (defined by  $\phi_v = 0^\circ$  and  $\phi_v = 180^\circ$ ). For each solar zenith angle, the polarized reflectance is calculated for all viewing angles within the aforementioned ranges with an angular resolution of  $1^\circ$ . The solar zenith angle, ozone column density, refractive index, and wind speed are randomly sampled ~~in a linear scale~~from a uniform distribution. Chla is randomly sampled
- 15 ~~in a log scale~~from a log-uniform distribution. The fine mode volume fraction is sampled uniformly within  $[0, 1]$ , which is then randomly partitioned to each submode. To maintain a uniform distribution of the total AOD, we sampled the AOD at 550nm within  $[0, 0.5]$  in a linear scale. The volume density  $V_i$  of each submode is determined by the total aerosol optical depth and volume fraction for each mode. Fig. 2 shows one example simulation dataset for the angular distribution of reflectance and DoLP.

**Table 2.** Parameters used to represent the atmosphere and ocean system for the radiative transfer simulation and NN training.  $\theta_0$  and  $\theta_v$  are the solar and viewing zenith angles.  $\phi_v$  is the relative viewing azimuth angle.  $V_i$  denote the five volume densities defined in Eq. (8).  $m_r$  and  $m_i$  are the real and imaginary parts of the refractive index. Ozone column density ( $n_{O3}$ ) in the atmosphere, ocean surface wind speed, and Chla are also provided. The minimum (min) and maximum (max) values determine the parameter ranges used to generate NN training data, which are also the constraints in the retrieval algorithm. The initial values are the ones used in the retrieval optimization algorithm, where  $\theta_0$ ,  $\theta_v$ ,  $\phi_v$  and  $n_{O3}$  are assumed to be known from inputs.

| Parameters     | Unit                 | <del>min</del> Min | <del>max</del> Max | <del>initial</del> Initial |
|----------------|----------------------|--------------------|--------------------|----------------------------|
| $\theta_0$     | Degree               | 0                  | 70                 | ( <del>input</del> Input)  |
| $\theta_v$     | Degree               | 0                  | 60                 | ( <del>input</del> Input)  |
| $\phi_v$       | Degree               | 0                  | 180                | ( <del>input</del> Input)  |
| $n_{O3}$       | Dobson               | 150                | 450                | ( <del>input</del> Input)  |
| $m_r$ (fine)   | (None)               | 1.3                | 1.7                | 1.5                        |
| $m_r$ (coarse) | (None)               | 1.3                | 1.7                | 1.5                        |
| $m_i$ (fine)   | (None)               | 0                  | 0.03               | 0.015                      |
| $m_i$ (coarse) | (None)               | 0.                 | 0.03               | 0.015                      |
| $V_1$          | $\mu m^3 \mu m^{-2}$ | 0                  | 0.11               | 0.012                      |
| $V_2$          | $\mu m^3 \mu m^{-2}$ | 0                  | 0.05               | 0.007                      |
| $V_3$          | $\mu m^3 \mu m^{-2}$ | 0                  | 0.05               | 0.009                      |
| $V_4$          | $\mu m^3 \mu m^{-2}$ | 0                  | 0.19               | 0.017                      |
| $V_5$          | $\mu m^3 \mu m^{-2}$ | 0                  | 0.58               | 0.033                      |
| Wind speed     | m/s                  | 0.5                | 10                 | 5.0                        |
| Chla           | $mg/m^3$             | 0.001              | 30                 | 0.1                        |

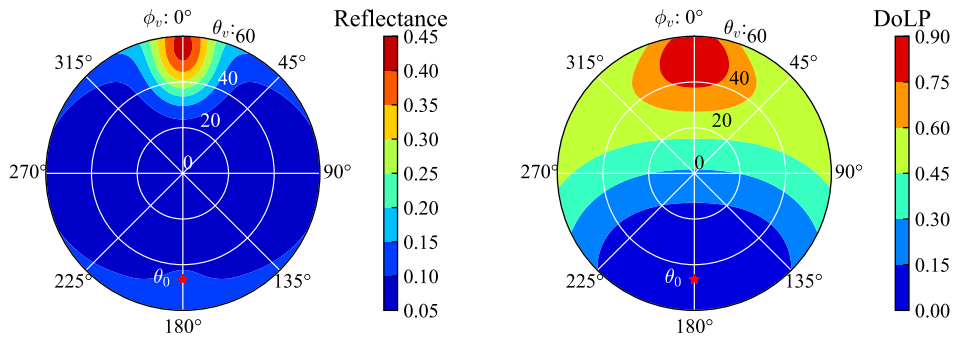

**Figure 2.** The reflectance (left panel) and DoLP (right panel) from radiative transfer simulation with the wind speed of  $4.13 \text{ m/s}$ , the aerosol optical depth of  $0.26$ , Chla of  $0.05 \text{ mg/m}^3$ , and ozone column density of  $196$  Dobsons. The antisolar point is indicated by the red asterisk with a solar zenith angle  $\theta_0 = 46.41^\circ$ .  $\theta_v$  and  $\phi_v$  indicate the viewing zenith and relative azimuth angles. The principal plane is defined by the viewing azimuth angle of  $0^\circ$  and  $180^\circ$ .

We randomly selected 20,000 cases out of the total 21,000 simulated cases for the training and validation processes, and the remaining 1000 random cases will be used as test cases to evaluate the NN accuracy, which will be discussed in the next section. To enable the ~~NN-NNs~~ to predict reflectance and DoLP at any given viewing geometry, for each case, we sampled 100 random pairs of viewing zenith and azimuth angles. If the sampled angles fall outside of the pre-defined angular grids, values from spline interpolation are used. The sunglint angles within an angle of  $40^\circ$  to the solar specular reflection direction are removed. Approximately 1 million data points are obtained for each wavelength for training.

To maintain both flexibility and efficiency, we trained two NN models for reflectance and DoLP respectively in the next section. Reflectance and DoLP have different accuracy requirements as discussed in Sect. 2, and also differ in angular variations as shown in the Figs. 2, therefore, it is convenient to control their accuracy through separated training procedures.

### 10 3.2 Neural network training

A feed-forward NN can be defined recursively with one input layer, one output layer, and  $k$  hidden layers (Aggarwal, 2018):

$$\mathbf{h}_1 = \Phi(\mathbf{W}_1^T \mathbf{x} + \mathbf{b}_1) \quad (16)$$

$$\mathbf{h}_{p+1} = \Phi(\mathbf{W}_{p+1}^T \mathbf{h}_p + \mathbf{b}_{p+1}), p = 1, \dots, k-1 \quad (17)$$

$$\mathbf{y} = \mathbf{W}_{k+1}^T \mathbf{h}_k + \mathbf{b}_{k+1} \quad (18)$$

15 where  $\mathbf{x}$  is the input parameter vector including all 15 parameters needed to define the forward model as listed in Table 2. Here  $\mathbf{x}$  not only contains the retrieval parameters in the state vector defined in Eq. (3) but also include additional non-retrieval parameters such as the solar zenith angle, viewing zenith and azimuth angles and the ozone column density.  $\mathbf{y}$  is a four-dimensional output vector for reflectance or DoLP at the four AirHARP bands. The weight matrix  $\mathbf{W}_{p+1}$  connects the  $p$ -th and  $(p+1)$ -th NN layers. The bias vector for the  $(p+1)$  layer is defined as  $\mathbf{b}_{p+1}$ . The output of each layer  $\mathbf{h}_{p+1}$  becomes the  
20 input of the next layer as shown in Eq. ~~??18~~.  $k$  is the number of hidden layers,  $k+1$  refers to the output layer. In this study, we tested several NN architectures and eventually chose three hidden layers with the number of nodes of 1024, 256 and 128 as shown in Table 3. The nonlinear activation function  $\Phi$  used in this model is the LeakyReLU function. ~~For each vector element,~~  
~~it,~~ which is defined as

$$\Phi(z) = \max(0, z) + 0.01 \times \min(0, z). \quad (19)$$

25 Both LeakyReLU and ReLU (defined as  $\max(0, z)$ ) activation functions are simple in their mathematical forms, and are tested in our NN trainings. LeakyReLU is eventually chosen due to its slightly better accuracy achieved than the NN with ReLU.

The training process is to minimize the cost function defined as the mean square error between the training data generated from radiative transfer simulations and the NN predicted values (Aggarwal, 2018). All parameters in the neural network weight matrices and bias vectors, over 670,000 numbers, need to be trained. With this large number of parameters, it is a  
30 challenging task to avoid overfitting where the model works well for the training dataset but poorly for the dataset not used in the training process. Several training procedures are performed for reflectance and DoLP data to avoid overfitting and improve NN performance:

1. Both input and output data are normalized before training. We normalize the input data into the range of [0,1] using the minimum and maximum values from the datasets as listed in Table 2. The reflectance and DoLP in the output layers are normalized by dividing their standard deviation of the training data at each wavelength.
  2. The Adaptive Momentum (Adam) algorithm (Kingma and Ba, 2014) with weight decay regularization (Loshchilov and Hutter, 2019) is used to update the weights and bias of the NN. The training dataset is divided into multiple mini-batches, each with 1024 random samples. The training iterations loop through all mini-batches in the training data (each loop is called an epoch). Convergence requires training through multiple epochs, where mini-batches are resampled in each epoch.
  3. The learning rate determines the step size in the parameter update. We use an exponential decay schedule to reduce the learning rate: we start with a learning rate of 0.005 and reduce the learning rate by a factor of 10 every 200 epoches.
  4. To monitor over-fitting in the training process, we split the data into 70% for training and 30% for validation. We conduct the optimization based on the training dataset, and meanwhile, we monitor the performance of training by applying the NN model on the validation dataset. To avoid overfitting, the early-stopping approach is employed where the training is stopped when the cost function on the validation dataset stops to reduce for a threshold of 50 epochs.
- The machine learning Python library Pytorch is used for the training (Paszke et al., 2019). The trained NN model is used to replace the radiative transfer model to compute the reflectance and DoLP in the retrieval algorithm. The ~~Jacobian~~ Jacobian matrix used in the optimization is computed by the finite difference approximation of the partial derivatives of reflectance and DoLP with respect to the retrieval parameters. Here central difference method is used. Note that the Jacobian matrix can also be computed analytically from the NN model using the automatic differentiation techniques based on the chain rule of differentiation (Baydin et al., 2018). This will be a topic in our future studies.

### 3.3 Neural network accuracy

After training the NN model, we evaluated its accuracy using synthetic AirHARP measurements generated from the 1000 simulation cases which have not been used in the training and validation process. Each simulation dataset includes polarized reflectance on regular viewing angle grids, which are interpolated to the viewing geometry of AirHARP to create synthetic measurement data and compare with the NN predictions. Glint angles are excluded from the comparison because the NNs are not trained over these angles. As one example shown in Fig. 43, both the reflectance and DoLP are in good agreement between the synthetic data and the NN results, where the maximum absolute differences for reflectance and DoLP are within 0.001 and 0.0025. This translates to a difference for both reflectance and DoLP mostly less than 1% for bands 440, 550 and 670nm. The maximum percentage difference can be as large as 3% for 870nm bands due to the small reflectance magnitude.

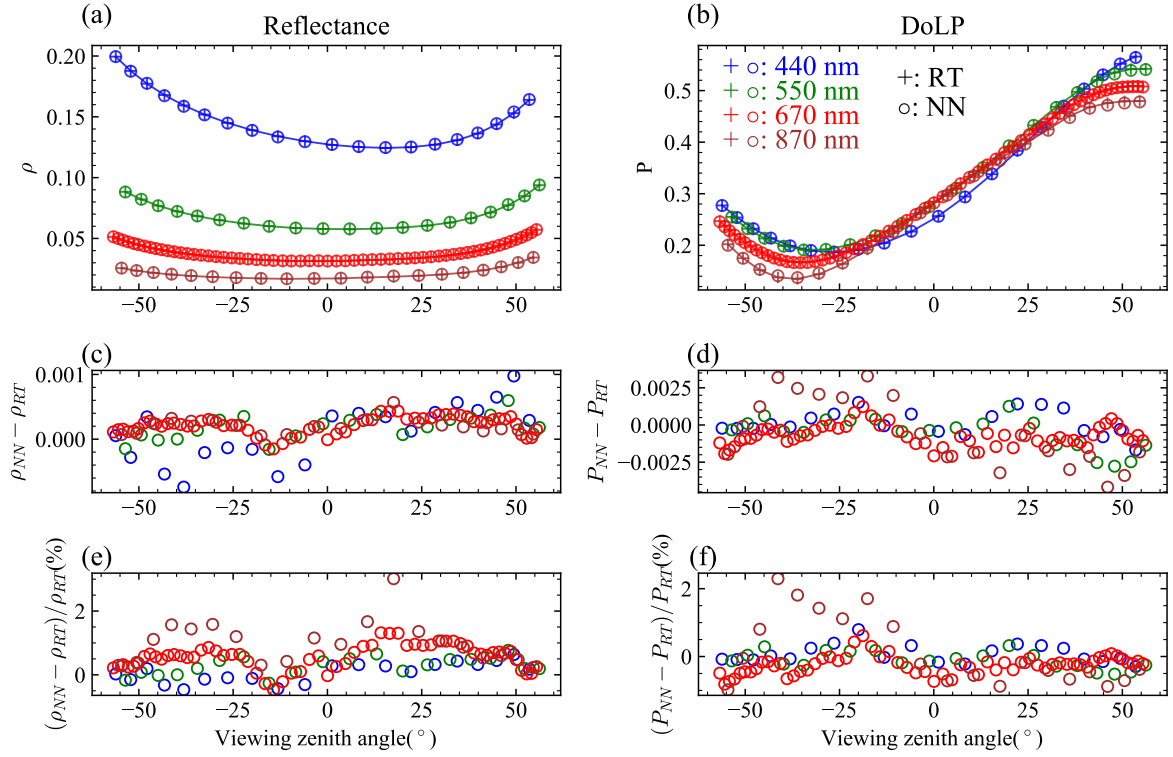

**Figure 3.** The synthetic HARP reflectance (left panel) and DoLP (right panel) sampled from the radiative transfer data shown in Fig. 2. The positive and negative signs of the viewing zenith angles indicate the azimuth angles of  $\phi_v = 116.2^\circ$  and  $180^\circ + \phi_v$ .

The comparison with all 1000 synthetic datasets and their NN predictions are shown in Fig. 4. The mean absolute error (MAE), and the root mean square error (RMSE) between the simulation data ( $T_i$ ) and the NN predicted data ( $R_i$ ) shown in Fig. 4 are defined as

$$\text{MAE} = \frac{1}{N} \sum_{i=1}^N |R_i - T_i|, \quad (20)$$

$$\text{RMSE} = \sqrt{\frac{1}{N} \sum_{i=1}^N (R_i - T_i)^2}. \quad (21)$$

Both MAE and RMSE are useful metrics, where MAE has less dependency on outliers comparing with RMSE.

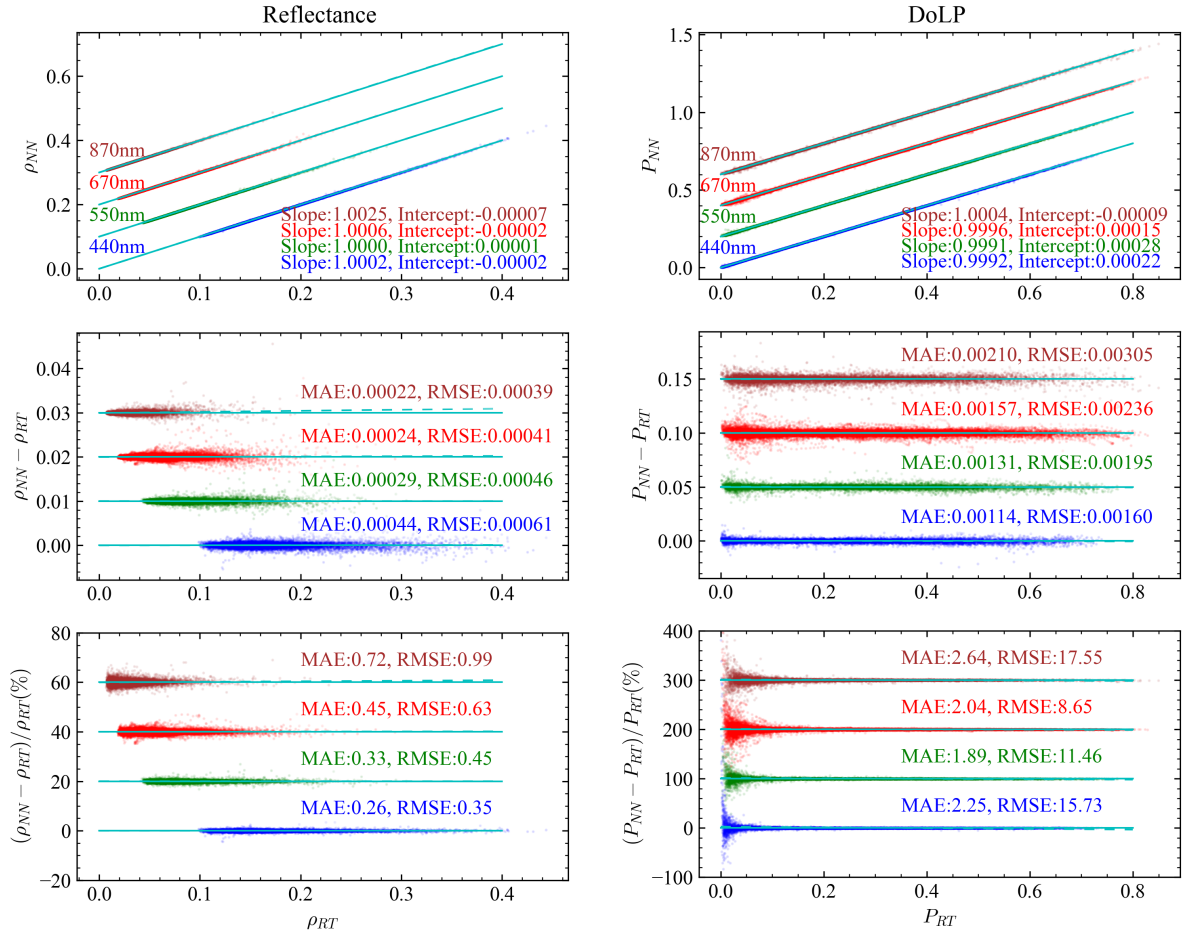

**Figure 4.** Comparison between the radiative transfer simulation and NN prediction, left panel: reflectance ( $\rho$ ); right panel: DoLP ( $P$ ). The scatter plots are shown in the top panel, the absolute different in the middle panel, and the percentage difference in the bottom panel. For each plot, the data points for the 550, 660 and 870nm bands are shifted upward by constant offsets consecutively as indicated by the solid cyan lines.

Analysis shows that the statistics of the differences between the NN prediction and the RT simulations as shown in Fig. 4 can be well modeled by Gaussian distributions and characterized by RMSE. Therefore the RMSE is used to represent the NN uncertainties for both reflectance ( $\sigma_{\rho,NN}$ ) and DoLP ( $\sigma_{P,NN}$ ) and will be incorporated into the total uncertainties in the cost function. Table. 3 summarizes the uncertainties of the NN models. The  $\sigma_{\rho,NN}$  at 440 nm is 0.0006, which decreases to 0.0004 at 870 nm. However, due to the smaller reflectance magnitude at 870nm, the corresponding RMSE for the percentage reflectance difference as shown in Fig. 4 is increased from 0.4% at 440nm to 1.0% at 870nm. For DoLP, the maximum  $\sigma_{P,NN}$  is 0.003 at 870 nm which decreases to 0.0016 at 440 nm. The uncertainties can be further improved with more training data points. For the readers' information, RMSE of the NN model trained with 20,000 cases (1 million data points) decreases by

a factor of  $\sqrt{2}$  in comparison with the one using 10,000 cases (0.5 million data points). It takes 0.01s in a single-core CPU (AMD EPYC Processor) or 1 ms in a GPU (GeForce GTX 1060) to predict all 120 angles for both reflectance and DoLP in the NN forward model. Furthermore, the data sizes for the NNs are minimal which are 1.2MB for the reflectance and DoLP and less than 100KB for the factor  $[C_{BRDF}/T_{dtu}]$  (details in Sect. 3.4 as shown in Table 3.

**Table 3.** The accuracy of the NN for the corresponding quantities in terms of the RMSE ( $\sigma_{NN}$ ) of the difference between the NN predicted values and the truth values from radiative transfer simulation. The NN architecture denotes the number of the nodes in each layer. The corresponding NN data sizes are indicated. Remote sensing reflectance is computed by Eq.(10) using the NNs for  $\rho_{t,atms+sf c}^f$  and  $[C_{BRDF}/T_{dtu}]$  as discussed in Section-Sect.3.4.(The percentage values listed below in the parenthesis are the percentage uncertainties defined as the RMSE of the percentage difference between the RT simulation and NN predictions.)

| Quantities                                | NN architecture                                 | Size          | $\sigma_{NN}(440\text{nm})$ | $\sigma_{NN}(550\text{nm})$ | $\sigma_{NN}(670\text{nm})$ | $\sigma_{NN}(870\text{nm})$ |
|-------------------------------------------|-------------------------------------------------|---------------|-----------------------------|-----------------------------|-----------------------------|-----------------------------|
| $P_t^f$                                   | $15 \times 1024 \times 256 \times 128 \times 4$ | <u>1.2 MB</u> | 0.0016                      | 0.0020                      | 0.0024                      | 0.0030                      |
| $\rho_t^f$                                | $15 \times 1024 \times 256 \times 128 \times 4$ | <u>1.2 MB</u> | 0.00061(0.4%)               | 0.00046(0.5%)               | 0.00041 (0.6%)              | 0.00039 (1.0%)              |
| $\rho_{t,atms+sf c}^f$                    | $14 \times 1024 \times 256 \times 128 \times 4$ | <u>1.2 MB</u> | 0.00084(0.4%)               | 0.00065(0.6%)               | 0.00057 (0.9%)              | 0.00055 (1.3%)              |
| $\left[ \frac{C_{BRDF}}{T_{dtu}} \right]$ | $15 \times 128 \times 128 \times 4$             | <u>86 KB</u>  | 0.02(0.9%)                  | 0.01(0.7%)                  | 0.01(1.0%)                  | 0.01(1.0%)                  |
| $R_{rs}$                                  | *Eq (10)                                        | <u>N/A</u>    | 0.0004                      | 0.0002                      | 0.0002                      | 0.0001                      |

- 5 The assessment of the NN accuracy is relative to the synthetic measurements simulated by the vector radiative transfer simulations. To account for the modeling uncertainties of the forward model  $\sigma_f$ , we consider both the NN accuracy  $\sigma_{NN}$  and the numerical accuracy of the radiative transfer simulations  $\sigma_{RT}$  for reflectance and DoLP, respectively. Uncertainties due to incomplete assumptions in the forward model are not considered. Several internal parameters determine the numerical accuracy of the radiative transfer simulations. In the framework of the successive order of scattering (Zhai et al., 2008, 2009),
- 10 these parameters include the number of scattering orders (Ns), the number of Gaussian quadratures for discretizing the viewing zenith angle in the atmosphere ( $P_a$ ) and ocean ( $P_o$ ), and the order of Fourier decomposition ( $M$ ) for the viewing azimuth angle, and the order of Legendre expansion ( $L$ ) of the single scattering phase function. In this study, we chose  $N = 20$ ,  $P_a = 32$ ,  $P_o = 64$ ,  $M = 32$ , and  $L = 32$ , which has a higher accuracy than the radiative transfer forward model directly used in our previous retrieval studies Gao et al. (2020).
- 15 To quantify the accuracy of the radiative transfer calculation used for generating training data ( $\sigma_{RT}$ ), we simulated an additional 1000 synthetic AirHARP datasets with all internal parameters doubled as the most rigorous calculations, and the viewing angular resolution was reduced from  $1^\circ$  to  $0.5^\circ$  in order to reduce interpolation errors. The resultant reflectance and DoLP values are compared between these two sets of radiative transfer calculations. The RMSE for each band can be used as a measure of the accuracy for the radiative transfer calculation used to generate the training data ( $\sigma_{RT}$ ). The uncertainties  $\sigma_{RT}$
- 20 for reflectance and DoLP are summarized in Table 4, with reflectance uncertainties less than 0.00015 and DoLP uncertainties less than 0.0007 for all AirHARP bands.  $\sigma_{\rho,RT}$  is about four times smaller than the NN uncertainties, and  $\sigma_{P,RT}$  is about 4 to 10 times smaller. ~~Therefore, NN uncertainties are not dominated by the uncertainties of the RT simulation.~~ The measurement



uncertainties from calibration ( $\sigma_{cal}$ ) and pixel-averaging ( $\sigma_{avg}$ ) as discussed in Section 2 are also summarized in Table 4, which shows the total forward model uncertainties  $\sigma_f = \sqrt{\sigma_{RT}^2 + \sigma_{NN}^2}$  as approximated in Eq. (7) are much smaller than the total measurement uncertainties  $\sigma_m = \sqrt{\sigma_{cal}^2 + \sigma_{avg}^2}$  as defined in Eq. (6). The overall uncertainties used in the retrieval cost function in Eq (3) are dominated by the measurement contributions as we expected.

**Table 4.** Comparisons of the uncertainties for reflectance ( $\rho$ ) and DoLP ( $P$ ) for both measurement and forward model including calibration uncertainty ( $\sigma_{cal}$ ), the uncertainty from averaging AirHARP pixels into a  $550\text{ m} \times 550\text{ m}$  box ( $\sigma_{avg}$ ), the radiative transfer simulation uncertainty ( $\sigma_{RT}$ ), and the NN uncertainty ( $\sigma_{NN}$ ). Same  $\sigma_{\rho,NN}$  and  $\sigma_{P,NN}$  have been shown in Table 3, and are repeated here for comparisons. (Same as Table 3, the percentage values listed in the table indicate the percentage uncertainties.)

| Uncertainties                                                                                                        | 440nm           | 550nm           | 670nm          | 870nm          |
|----------------------------------------------------------------------------------------------------------------------|-----------------|-----------------|----------------|----------------|
| $\sigma_{\rho,cal}$                                                                                                  | 3%              | 3%              | 3%             | 3%             |
| <del><math>\sigma_{\rho,avg}</math> 0.0006 (0.3%) 0.0004 (0.5%) 0.0004 (1.0%) 0.0004 (1.7%)</del> $\sigma_{\rho,RT}$ | 0.00012 (0.08%) | 0.00005 (0.07%) | 0.00010 (0.2%) | 0.00015 (0.4%) |
| $\sigma_{\rho,NN}$                                                                                                   | 0.00061 (0.4%)  | 0.00046 (0.5%)  | 0.00041 (0.6%) | 0.00039 (1.0%) |
| $\sigma_{P,cal}$                                                                                                     | 0.01            | 0.01            | 0.01           | 0.01           |
| <del><math>\sigma_{P,avg}</math> 0.006 0.006 0.009 0.020</del> $\sigma_{P,RT}$                                       | 0.0002          | 0.0002          | 0.0005         | 0.0007         |
| $\sigma_{P,NN}$                                                                                                      | 0.0016          | 0.0020          | 0.0024         | 0.0030         |

5 Furthermore, in this study higher accuracies from the radiative transfer simulations are used for the NN training for comparison with the accuracies from the radiative transfer model directly used in our previous retrieval algorithm. Since the simulations of the training data can be conducted independent to the retrieval algorithm, higher computational costs can be accommodated to improve NN forward model accuracy. After the NN model is trained, the model can be applied to the retrieval algorithm through efficient matrix operations.

### 10 3.4 Neural network model for remote sensing reflectance

As discussed in Sect. 2.2, the water leaving signals are represented by the remote sensing reflectance as defined in Eq. (10) (Mobley et al., 2016). To conduct the atmospheric correction in Eq. (11), we need to determine the reflectance  $\rho_{t,atmos+sf_c}^f$  at the aircraft level, transmittance  $t_u^f$  and  $T_d^f$ , and the BRDF correction coefficient  $C_{BRDF}$ . Based on Eq. 10, we combined  $T_d^{f,+}$ ,  $t_u^{f,+}$ , and  $C_{BRDF}$  into a single term denoted as  $[C_{BRDF}/T_d t_u]$ . To efficiently determine  $R_{rs}$ , two NNs need to be trained to  
15 represent  $\rho_{t,atmos+sf_c}^f$  and  $[C_{BRDF}/T_d t_u]$ , respectively.

Following similar NN training schemes as discussed previously, we conducted 10,000 simulations to determine the reflectance at aircraft altitude  $\rho_{t,atmos+sf_c}$  from a system with only atmosphere and ocean surface (right panel of Fig. 1), and trained the NN for  $\rho_{t,atmos+sf_c}$  in the same way as  $\rho_t^f$ . Since this system only includes atmosphere and ocean surface but without ocean body, there are total 14 input parameters (without Chla). To train a NN for  $[C_{BRDF}/T_d t_u]$  with  $T_d^{f,+}$ ,  $t_u^{f,+}$ , and  
20  $C_{BRDF}$  defined in Eqs. (12),(13) and (14), we obtained five additional quantities corresponding to the above-mentioned 10,000 cases with and without ocean body: for the fully coupled system with atmosphere, ocean surface and ocean body (left panel of

Fig. 1), we computed the reflectance just above and below the ocean surface ( $\rho_t^{f,+}$  and  $\rho_t^{f,-}$ ), and irradiance transmittance just above and below the ocean surface ( $T_d^{f,+}$  and  $T_d^{f,0}$ ); for the system without ocean body but with ocean surface (right panel of Fig. 1), we computed the reflectance just above the ocean surface ( $\rho_{t,atmos+sf}^{f,+}$ ). The accuracy of the NNs for  $\rho_{t,atmos+sf}^f$  and  $[C_{BRDF}/t_u T_d]$  are evaluated and shown in Table 3, which ~~are in the same order of uncertainty magnitudes in percentage as~~

5 has an accuracy around 1% similar to other quantities.

To evaluate the overall accuracy for the  $R_{rs}$  after the BRDF correction, we conducted radiative transfer simulations with a zenith sun and a nadir viewing direction, and obtained the truth remote sensing reflectance using the upwelling radiance and downwelling irradiance just above the ocean surface as examples shown in Fig. 5. The predicted  $R_{rs}$  were computed from Eq. (10) after the application of two NNs. The RMSE of the difference between the simulated and NN predicted  $R_{rs}$  are shown

10 in Table 3 with a maximum value of 0.0004 at wavelength 440 nm, and smaller than 0.0002 in other bands. These values including all uncertainties including the accuracy of the NN and assumptions in the BRDF model.

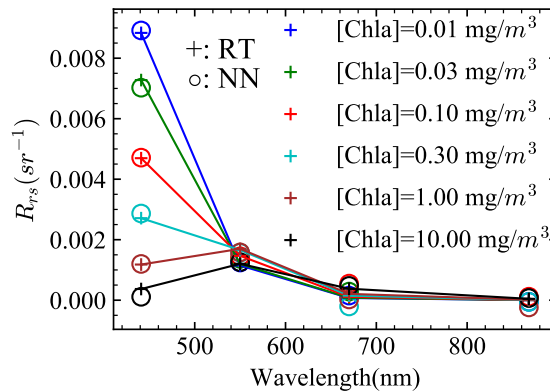

**Figure 5.** Comparison of the truth  $R_{rs}$  (RT) and the neural network (NN) computed  $R_{rs}$ . The truth  $R_{rs}$  is computed from radiative transfer simulations with a zenith sun and nadir viewing direction. The NN computed  $R_{rs}$  is following Eq. (10).

#### 4 Joint retrieval results on synthetic AirHARP measurements

The NN forward models for reflectance ( $\rho_t^f$ ) and DoLP ( $P_t^f$ ) are used in the FastMAPOL retrieval algorithm as discussed in Sect. 2. To evaluate the performance of the retrieval algorithm, we conducted retrievals on the synthetic AirHARP data. The

15 creation of the synthetic data is discussed in Sect. 3.3. To account for the measurement uncertainties, random noise is added to the simulated data according to the calibration uncertainties as listed in Table 4. The total uncertainties in the cost function include contributions from calibration ( $\sigma_{cal}$ ), radiative transfer simulation ( $\sigma_{RT}$ ), and NN model ( $\sigma_{NN}$ ). ~~Uncertainties from pixel-averaging ( $\sigma_{avg}$ ) for the AirHARP field measurements are not considered in the synthetic dataset.~~

Using the initial values as listed in Table 2, a total of 1000 synthetic AirHARP cases are retrieved with the cost function

20 values( $\chi^2$ ) summarized in Fig 6. Retrievals with  $\chi^2 < 1.5$  are chosen in our following discussion, which includes 96% of all

retrieval cases. Gao et al. (2020) showed that the retrieval results depend on the initial values. Testing with several random sets of initial values shows that the statistics of the retrieval results from the 1000 synthetic cases are robust. As demonstrated by Di Noia et al. (2015) and Di Noia et al. (2017), a better choice of initial values for each pixel in the optimization may further improve the overall retrieval accuracy.

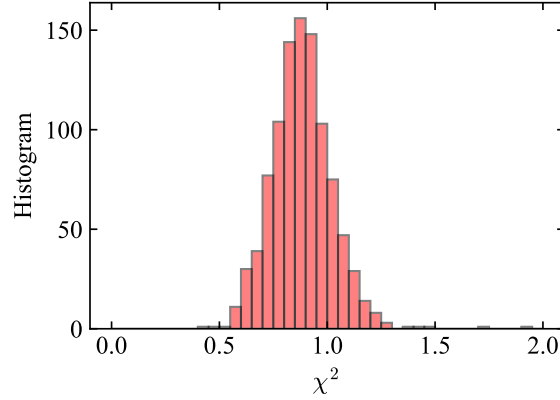

**Figure 6.** Histogram of the cost function values ( $\chi^2$ ) with initial values as specified in Table 3 with a total of 1000 cases. The most probable  $\chi^2$  is 0.82. A threshold of  $\chi^2 < 1.5$  is used in the discussion.

5 With the directly retrieved aerosol refractive index and volume densities (see Table 2) as inputs, the aerosol optical depth (AOD) and single scattering albedo (SSA) for both the fine and coarse modes, were computed using additional NNs to represent the Lorenz-Mie calculations in Appendix A. The retrieved total AOD, SSA, wind speed, and Chla are compared with the truth values as shown in Fig. 7. Total AOD indicates the summation of the fine and coarse mode AODs and total SSA is the ratio of the total scattering and extinction cross-sections, both are specified in in Appendix A. For fine aerosol, the AOD, SSA,  
10 refractive index ( $m_r$ ), effective radius ( $r_{eff}$ ) and variance ( $v_{eff}$ ) are shown in Fig. 8. The color plots indicate the data point density (normalized by its maximum value) approximated by a kernel density estimation method (Silverman, 1986).

In order to quantify the variation of the retrieval uncertainties with respect to different aerosol loadings, we computed the the RMSE between the retrieved and truth values at five AOD ranges including [0.01,0.1], [0.1,0.2], [0.2,0.3],[0.3,0.4] and [0.4,0.5]. The each AOD ranges includes an approximate 200 cases. Note that as discussed in Sect. 3.3, the total AOD and the  
15 fine mode volume fraction are uniformly sampled for the simulated data, therefore, there is an equal mixing fraction of fine and coarse mode aerosol for each AOD range. The retrieval uncertainties for aerosols are shown in Figure 9 with the corresponding ranges indicated by AOD values from 0.1 to 0.5. All discussions regarding the AOD and SSA are for wavelength of 550nm in this section.

As shown in Fig. 7 and Fig. 9, the errors of the retrieved total AOD increase with aerosol loadings: the uncertainty (evaluated  
20 using RMSE) is 0.008 and 0.015 for the AOD range [0.01, 0.1] and [0.1,0.2], and increases to 0.035 for the AOD range [0.4,0.5]. Similar absolute uncertainties are found for both the fine and coarse mode AODs with a value slightly smaller. In percentage,

the total AOD uncertainties is 28.3% at the AOD range [0.01, 0.1] where the large uncertainties is due to the cases with small AODs. For the AOD range from [0.1,0.2] to [0.4,0.5], the AOD uncertainties further decrease from 14.4% to 5.6%.

Similar to the total AOD uncertainties, the total SSA uncertainties decreases with AOD from 0.05 to 0.02. The fine mode SSA uncertainties reduce similarly from 0.05 to 0.03. The uncertainties for coarse mode SSA reduces slightly from 0.1 to 0.08 which is more than twice larger than the fine mode SSA uncertainties. The uncertainties for the fine mode  $m_r$ ,  $r_{eff}$  and  $v_{eff}$  shows a larger value in the AOD bin of [0.01,0.1] of 0.06,  $0.024 \mu m$ , 0.08, and then remain close to constant with a value of 0.03,  $0.01 \mu m$  and 0.03 respectively. The averaged uncertainties for coarse mode  $m_r$ ,  $r_{eff}$  and  $v_{eff}$  are approximately 0.08,  $0.5 \mu m$  and 0.15 respectively weakly AOD dependency. The coarse mode  $m_r$  uncertainty are more than twice to the fine mode uncertainty. The larger uncertainty values for coarse mode  $r_{eff}$  and  $v_{eff}$  are also related to their large particle size.

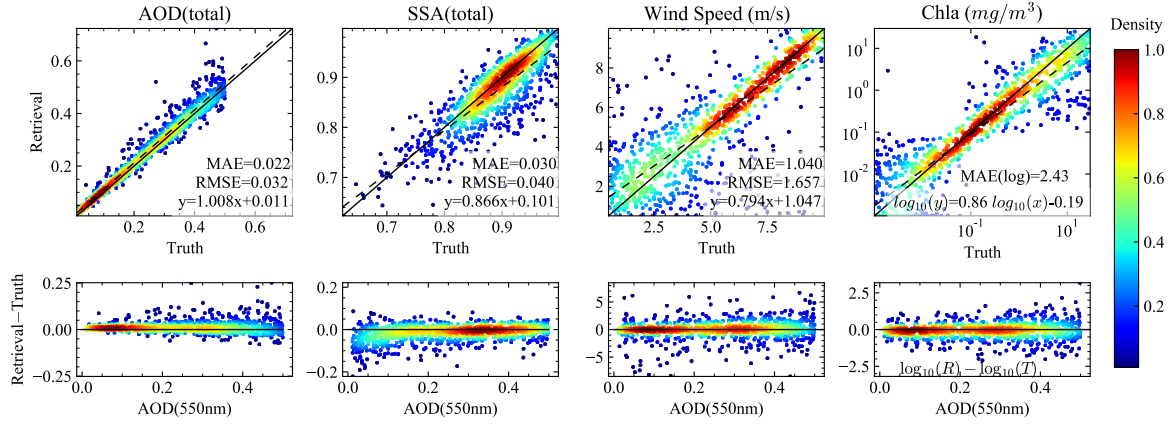

**Figure 7.** The comparisons of the retrieved and truth values for total AOD (550 nm), SSA (550 nm), wind speed, and Chla are shown in the top panels. The dashed line indicates the linear regression fitting with  $y = \beta x + \alpha$ , where  $\beta$  is the slope and  $\alpha$  is the intercept. The lower panels show the difference between the retrieved and truth values of the corresponding upper panel parameters as a function of the total AOD at 550 nm.

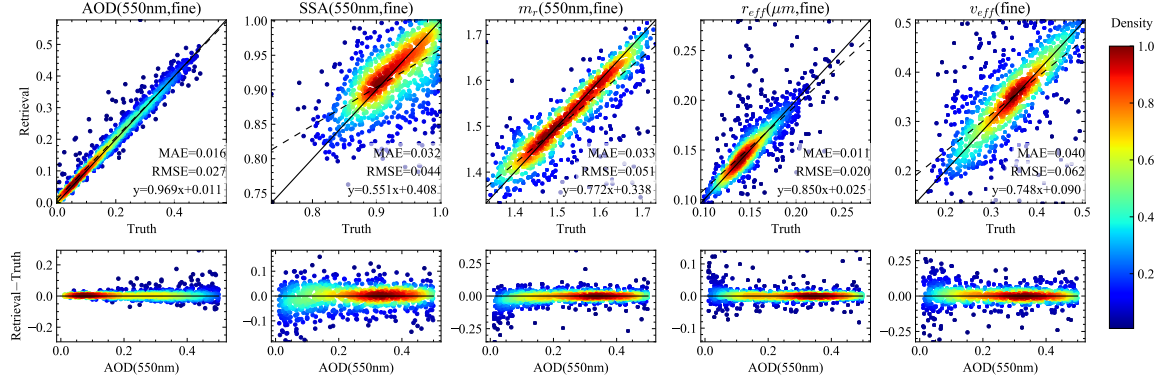

**Figure 8.** The comparisons of the retrieved and truth values for the fine mode aerosol parameters including AOD, SSA, refractive index ( $m_r$ ), effective radius ( $r_{eff}$ ) and variance ( $v_{eff}$ ).

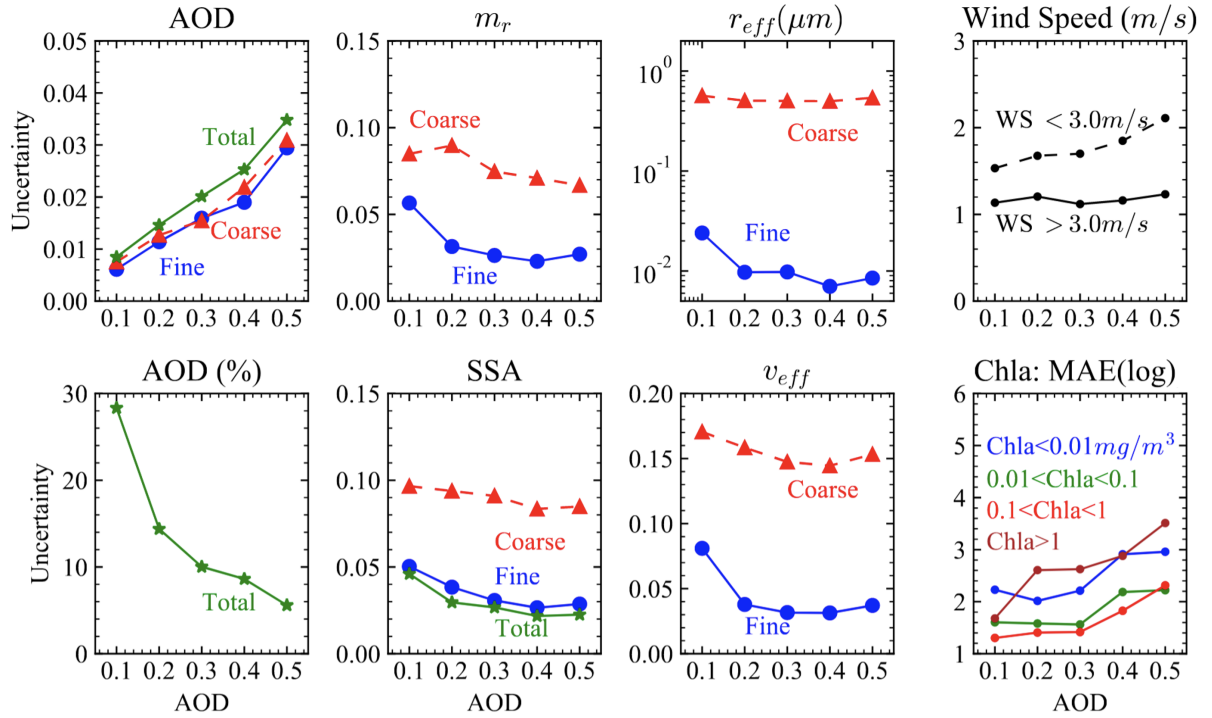

**Figure 9.** The retrieval uncertainties at various aerosol loadings for AOD, SSA, refractive index ( $m_r$ ), effective radius ( $r_{eff}$ ) and variance ( $v_{eff}$ ), wind speed, and Chla. AOD values at the x-axis from 0.1 to 0.5 indicate the five ranges of total AOD including [0.01,0.1], [0.1,0.2], [0.2,0.3], [0.3,0.4] and [0.4,0.5] which are used to compute the corresponding uncertainties. Chla uncertainties are evaluated in terms of MAE in log scale (see Eq. (22)) and all other parameters are evaluated in terms of RMSE. AOD(%) indicate the percentage AOD uncertainties comparing to the truth AOD.

For wind speed retrievals as shown in Fig. 7 the agreements between the truth and retrievals depend strongly on the wind speed value itself: when the wind speed is small, there is less retrieval sensitivity due to the removal of glint; for larger wind speed, the agreements are improved, likely due to the larger range of angles influenced by wind speed. The retrieval uncertainties are shown in Fig. 9, for wind speed (WS) smaller than 3 m/s, the uncertainty increases from 1.5 to 2.1 m/s for AOD ranges from [0.1,0.2] to [0.4, 0.5]. ~~While for~~ For wind speed larger than 3 m/s, the averaged retrieval uncertainty is ~~almost an constant of~~ 1.2 m/s with a small ~~increase variation~~ less than 0.1 m/s. The retrieved and truth Chla is compared in Fig. 7 where the MAE in log scale ~~, or MAE(log),~~ is used with definition as:

$$\text{MAE}(\log) = 10^Y \text{ where } Y = \frac{1}{N} \sum_{i=1}^N |\log_{10}(R_i) - \log_{10}(T_i)| \quad (22)$$

where  $R_i$  and  $T_i$  denote the retrieval and truth values. MAE(log) is recommended by Seegers et al. (2018) as a better metrics for Chla, which indicates the averaged ratio between the retrieval and truth values. The dependency of the MAE(log) for Chla with the aerosol loadings is shown in Fig. 9. The Chla retrieval performance depends on the magnitude of the Chla. In this work, we chose four ranges of Chla according to the trophic regions discussed in (Seegers et al., 2018). Note that Chla from in-situ measurements is typically larger than  $0.01 \text{ mg/m}^3$  and we chose a broader range of Chla with its minimum value of  $0.001 \text{ mg/m}^3$  as listed in Table 2 for sensitivity studies. For  $0.01 \text{ mg/m}^3 < \text{Chla} < 0.1 \text{ mg/m}^3$  and  $0.1 \text{ mg/m}^3 < \text{Chla} < 1 \text{ mg/m}^3$ , Chla retrieval uncertainties vary within 1.3 to 1.6 when  $\text{AOD} < 0.3$ , and then increase to 2.3 at AOD range [0.4,0.5]. For  $\text{Chla} > 1 \text{ mg/m}^3$  and  $\text{Chla} < 0.01 \text{ mg/m}^3$ , the uncertainties are generally larger with a value around 2 to 3.

With the retrieved aerosol and ocean properties, the atmospheric correction procedures can be applied to compute the remote sensing reflectance as discussed in ~~Section-Sect.~~ 3.4. The comparison of the retrieved  $R_{rs}$  with the truth data is shown in Fig. 5. To account for the various solar geometries, the BRDF correction has been applied ~~on-to~~ the retrieved  $R_{rs}$  as discussed in ~~Section-3.4. Sect. 3.4. Note that the  $\mathfrak{R}_o/\mathfrak{R}_i$  factor will not impact the BRDF correction in computing  $R_{rs}$  for the synthetic data, because of the small viewing zenith angles used at the four AirHARP bands, which are  $1.22^\circ$ ,  $1.17^\circ$ ,  $0.03^\circ$ ,  $3.52^\circ$ , respectively.~~ The truth  $R_{rs}$  was computed with a zenith sun and a nadir viewing direction, emphasizing the need for the latter correction to the MAP observations. Overall  $R_{rs}$  uncertainties for the four bands are 0.007, 0.0004, 0.0002 and 0.0002 as shown by the RMSE in Fig. 10. MAE showed values of 0.0006, 0.0003, 0.0002 and 0.0001, which are less sensitive to ~~the~~ outliers. Note that the atmospheric correction is applied ~~on-to~~ the synthetic measurements without adding additional random noise in order to evaluate the impacts on  $R_{rs}$  uncertainties from only aerosol and ocean surface properties retrievals. The retrieval uncertainties for  $R_{rs}$  for each AirHARP bands are shown in Fig. 10 depending on the aerosol loadings: larger uncertainties are found with larger aerosol optical depth.

The PACE accuracy requirements on ocean color are specified in terms of the water-leaving reflectance, which can be converted to those of  $R_{rs}$  by dividing them by a factor of  $\pi$ . The resultant requirements in terms of  $R_{rs}$  are  $0.0006 \text{ sr}^{-1}$  or 5% from 400 to 600 nm, and  $0.0002 \text{ sr}^{-1}$  or 10% from 600 to 710 nm (Werdell et al., 2019). As shown in Fig. 11,  $R_{rs}$  at 550nm are within the requirement of  $0.0006 \text{ sr}^{-1}$  for all AOD ranges. For 440 nm band, when AOD is less than 0.3, the  $R_{rs}$  retrieval uncertainties are larger than the requirement when AOD is larger than 0.3 less than  $0.0005 \text{ sr}^{-1}$ ; but the uncertainties become as high as  $0.001 \text{ sr}^{-1}$  at a larger AOD of 0.5.  $R_{rs}$  at 670 and 870 nm varies in a very small dynamical range and has less

impacts by the aerosol retrievals.  $R_{rs}$  uncertainties at 670 and 870 nm are slightly larger than the requirement of  $0.0002 \text{ sr}^{-1}$  when AOD(550nm) is larger than 0.4 and 0.3 respectively. Further work is needed to understand how the uncertainties of the retrieved aerosol properties influence the retrievals. Note that from Table 3, the uncertainties of the  $R_{rs}$  computed using NNs have an uncertainty of 0.0004 to 0.0001 from 440nm to 870nm, which may be further ~~reduced~~minimized with better training and help ~~the reduction of the~~to reduce the  $R_{rs}$  retrieval uncertainties.

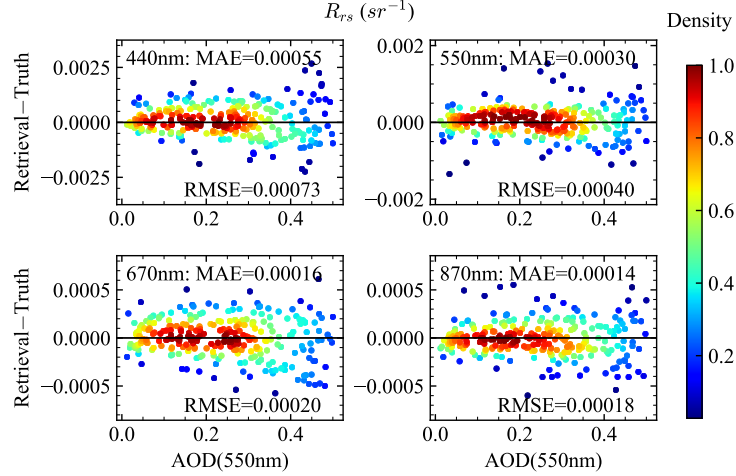

**Figure 10.** The difference between the retrieval and truth  $R_{rs}$  with respect to AOD. The truth  $R_{rs}$  is computed with a zenith sun and a nadir viewing direction. The retrieved  $R_{rs}$  is following Eq.(10) with the BRDF correction considered. RMSE and MAE are for all retrievals cases at each wavelength.

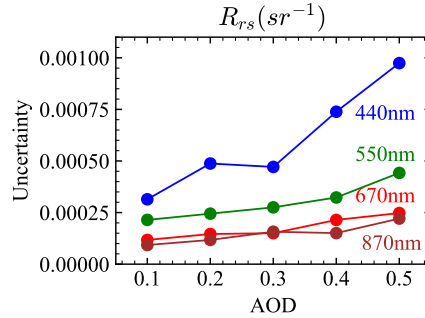

**Figure 11.** Retrieval uncertainties for  $R_{rs}$  at the four AirHARP bands. The uncertainties are computed in the same way as for Fig.9 in terms of RMSE.

## 5 Joint retrieval results on AirHARP measurements from ACEPOL

The ACEPOL field campaign, conducted from October to November of 2017, included a total of six passive and active instruments on the NASA ER2 high-altitude aircraft (Knobelspiesse et al., 2020) with four MAPs: AirHARP (McBride et al., 2020), AirMSPI (Diner et al., 2013), SPEX Airborne (Smit et al., 2019) and the RSP (Cairns et al., 1999), and two lidars: HSRL-2 (Burton et al., 2015) and CPL (the Cloud Physics Lidar) (McGill et al., 2002). Aerosol retrieval algorithms have been applied for all four MAPs (Fu et al., 2020; Puthukkudy et al., 2020; Gao et al., 2020). The measurement datasets are available from the ACEPOL data portal (Knobelspiesse et al., 2020). In this work, we focus on the study of the AirHARP measurements over ocean scenes as shown in Fig. 12 on Oct 23, 2017. The viewing angles are within  $\pm 57^\circ$  along-track, and  $\pm 47^\circ$  cross-track as shown in the polar plots in Fig. 12. Fig. 13 shows the RGB images (670, 550 and 440nm) for the three scenes at near nadir viewing direction. AirHARP conducted high spatial resolution measurements with a grid size of 55 m and swath width of 42km at nadir (up to 60km at far angles). We averaged the reflectance and DoLP respectively within a bin box of 10 x 10 pixels (550m x 550 m).



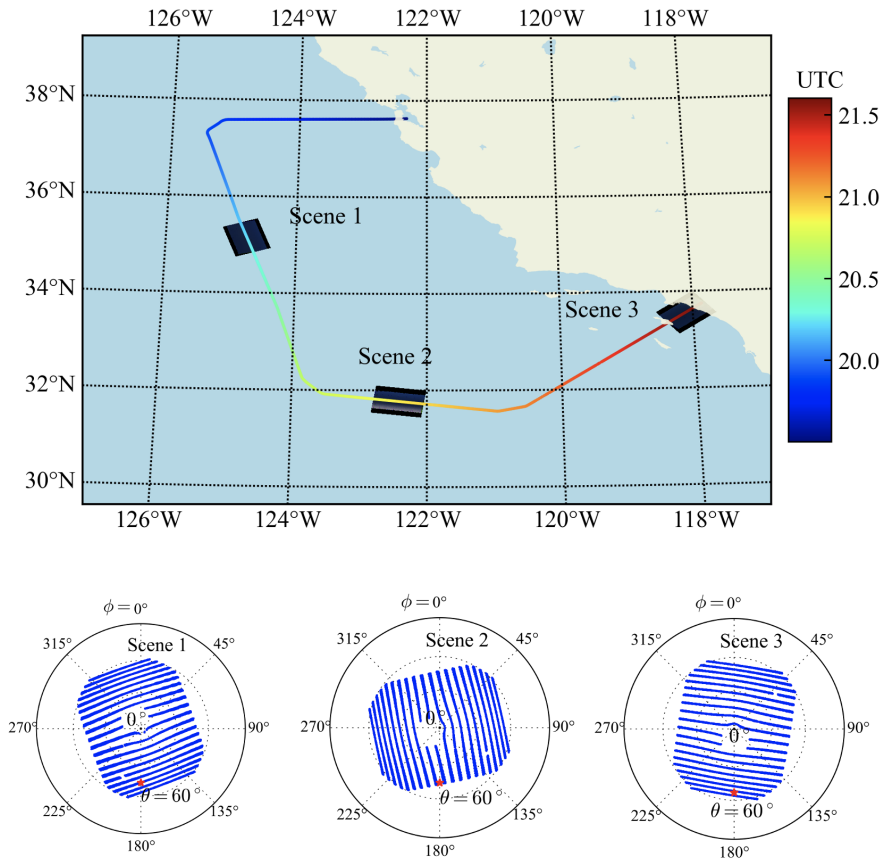

**Figure 12.** The location of the three ocean scenes from AirHARP from ACEPOL on Oct 23, 2017. The flight track is color labeled by the UTC. The aircraft flew at an altitude of 20.1 km. The viewing zenith and relative azimuth angle (relative to the solar azimuth angle) for the 440 nm band from all pixels in the corresponding scene are shown in the bottom polar plots. The central portion of viewing angle plot are removed due to water condensation on the lens. The averaged solar zenith angles for the three scenes are  $47.0^\circ$ ,  $45.6^\circ$  and  $52.9^\circ$ , respectively, as indicated in the polar plots by the red asterisks.

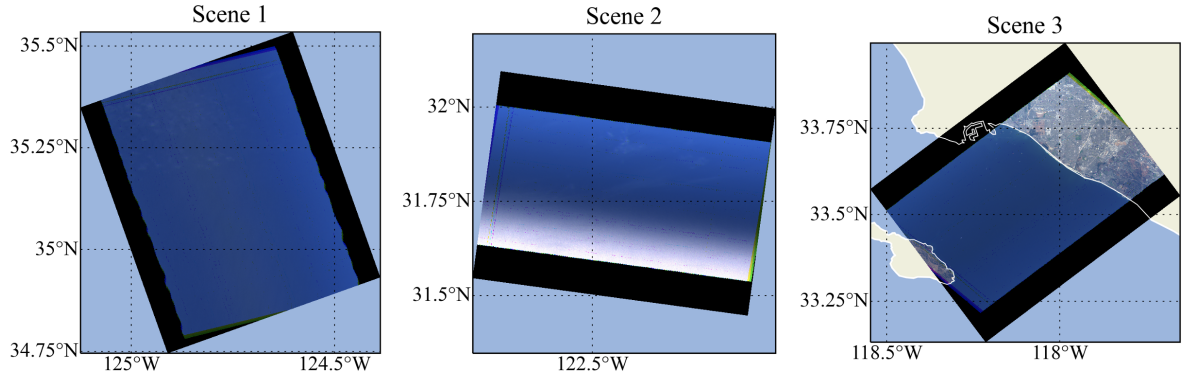

**Figure 13.** The RGB images (670,550,440 nm bands) for the three scenes at near nadir viewing directions. Scene 1 and 2 observe only ocean, while scene 3 observes both ocean and land. Sparse thin clouds are visible from scene 1 and 2. [Sunglint can be observed at the lower portion of Scene 2 image.](#)

The HSRL-2 instrument from ACEPOL provided useful aerosol optical depth ground truth at 355 and 532 nm (Hair et al., 2008; Burton et al., 2016), which was used for the validation of the aerosol retrieval algorithm using the AirHARP data. The HSRL-2 measures the pixels along the track as shown in Fig. 12, where an assumed lidar ratio of 40 sr is multiplied by the aerosol backscatter coefficient derived from the HSRL technique to produce aerosol extinction and AOD at 532 nm. For the

low aerosol loading cases considered in this study, the assumed lidar ratio approach produces a systematic uncertainty of  $\pm 50\%$  (Fu et al., 2020). In scene 3, the aircraft also flew over an AERONET USC\_SEAPRISM site [\(33.564°N, 118.118°W\)](#) which is equipped with a CIMEL-based system called the Sea-Viewing Wide Field-of-View Sensor (SeaWiFS) Photometer Revision for Incident Surface Measurements (SeaPRISM) that collects radiances at eight wavelengths of 412, 443, 490, 532, 550, 667, 870, and 1020 nm (Zibordi et al., 2009). AOD from the AERONET data product version 3 level 2.0 data was used in this

study, which is also consistent with the HSRL-2 AOD at 532nm as shown latter in Fig. 20. The estimated AERONET AOD uncertainty is from 0.01 to 0.02 with the maximum uncertainty in the UV channels (Giles et al., 2019). We compared AOD from AirHARP retrievals with those from both HSRL and AERONET. Furthermore, to validate the atmospheric correction procedure in the retrieval algorithm, we compared the retrieved remote sensing reflectance with the AERONET ocean color (OC) products as reported by the SeaPRISM measurements at the USC\_SEAPRISM site.

~~Here we applied the FastMAPOL algorithm to the AirHARP field measurements from ACEPOL.~~ [To assess the spatial variability of field measurement, we computed the standard deviations for the reflectance \( \$\sigma\_{\rho,avg}\$ \) and DoLP \( \$\sigma\_{P,avg}\$ \) within the bin box. Representative values are provided in Table 5. The values of  \$\sigma\_{\rho,avg}\$  and \( \$\sigma\_{P,avg}\$  at 870nm band are 4.5% and 0.05, respectively, which suggest larger measurement uncertainties at 870nm than other bands probably due to small radiometric magnitudes. Meanwhile, our retrieval tests showed larger coarse mode retrieval uncertainties than synthetic data results. To](#)

[better constraint retrievals, we assume the coarse mode aerosol as sea salt by setting its imaginary refractive index to zero. All other retrieval parameter range are kept the same as in Table 2. Furthermore, we found our forward model cannot predict the angular variation of DoLP in 440nm band well \(with an estimated MAE of 0.04\), which contributes a major portion to the cost](#)

function and increases both fine and coarse mode retrieval uncertainties. Therefore, we exclude DoLP in 440nm band from our retrievals in this study.

**Table 5.** The standard deviations of the reflectance ( $\sigma_{\rho,avg}$ ) and DoLP ( $\sigma_{P,avg}$ ) are calculated within 10x10 pixel box and averaged over all angle and pixels from the three scenes (over ocean pixels only). The percentage values listed in the table indicate the percentage uncertainties.

| Uncertainties       | 440nm         | 550nm         | 670nm         | 870nm         |
|---------------------|---------------|---------------|---------------|---------------|
| $\sigma_{\rho,avg}$ | 0.0018 (1.1%) | 0.0011 (1.3%) | 0.0009 (2.3%) | 0.0009 (4.6%) |
| $\sigma_{P,avg}$    | 0.015         | 0.016         | 0.024         | 0.052         |

We conducted retrieval with similar procedures as discussed for synthetic data. The solar and viewing geometries as shown in Fig. 12, and the ozone column density from MERRA2 are the ( $n_{O_3}$ ) are known inputs to the forward model. As discussed in Section 2, the total uncertainties are modeled as  $\sigma^2 = \sigma_{cal}^2 + \sigma_{avg}^2 + \sigma_{RT}^2 + \sigma_{NN}^2$  for reflectance and DoLP respectively, with all values listed in Table 4.

retrieval algorithm. The averaged values of  $n_{O_3}$  from MERRA2 over each of the three scenes are obtained, which are 277.5, 278.6, 281.3 Dobson respectively. The averaged surface pressures from MERRA2 over the three scenes are 1.008, 1.006 and 1.003 standard atmosphere pressure (atm), which is consistent with our assumption in the atmosphere model as discussed in Sect. 3. The histograms of  $\chi^2$  for all pixels retrieved in each scene are shown in Fig. 14. Comparing with the histogram in synthetic data retrievals in Fig. 6, the histograms in Fig. 14 show a longer tail with larger  $\chi^2$  value. The most probable  $\chi^2$  value. This may due to that some pixels are not represented well by the current forward model, and measurement uncertainties are not well quantified in the cost function as discussed in Sect. 2 are 1.1, 1.7, and 1.1 respectively.

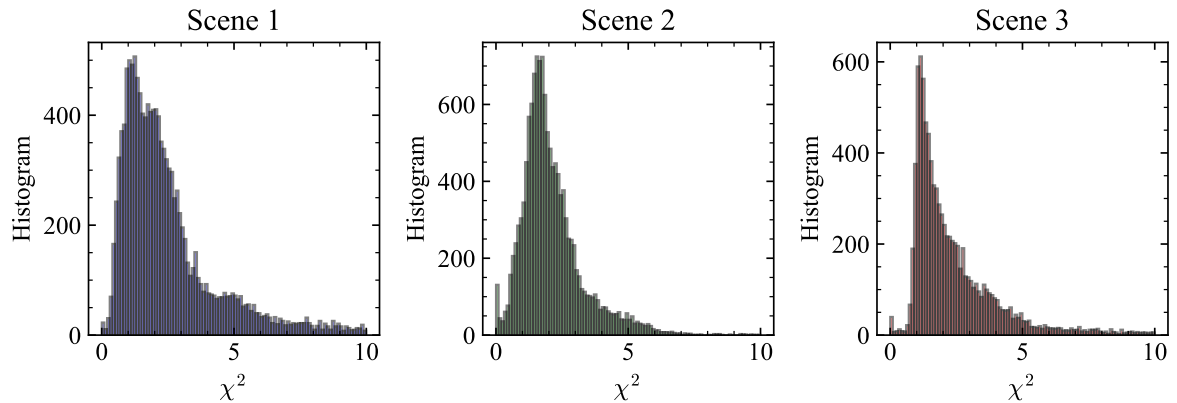

**Figure 14.** The histogram-histograms of the cost function values for-over the pixels-in-the three scenes as shown in Fig. 12. Each-scene has 3283 pixels used in the retrievals. The most probable  $\chi^2$  for the three-scenes are 1.5 with total pixel numbers of 13491, 0.513226, and 1.09159. Only pixels over ocean are considered. A threshold of  $\chi^2 < 1.5$  is used in the discussion.

To evaluate the retrieval performance, we plotted the map of the total number of viewing angles used in the retrieval ( $N_v$ ), cost function  $\chi^2$ , ~~and the~~ retrieved AOD(550nm) ~~and~~  $R_{rs}$  for each scene in Figs. 15, 16 and 17. As discussed in Sect. 2, the maximum number of viewing angles is 120 for AirHARP measurements. Figs 15,16 and 17 show the number of available viewing angles vary from 0 to 120 due to the removal of glint and other data quality control measures. Discontinuity in the number of angles can be seen as a stripe, due to the removal of angles influenced by water condensation ~~in-on~~ the lens, which can also be observed in the polar plots in Fig. 12 with the nadir region removed. All three figures show that the number of viewing angles are smaller at the edges parallel to the flight track, where small  $\chi^2$  can be achieved but may be less reliable.

For pixels with large  $\chi^2$  ~~as shown in Fig.14~~, the forward model cannot fit ~~the measured~~ reflectance or DoLP ~~to the measurements well~~, which may be due to ~~the contamination by cloud~~ cloud contamination (Stap et al., 2015), land, or residuals of glint. ~~The~~ ~~In scene 1, the top region with large  $\chi^2$  values is impacted by the thin cloud which is visible from Fig.13. Larger residual in the 870nm band between measurement and forward model are also observed. The retrieved AOD are also correlated with the large retrieved AOD (550nm) values, for instance, the central region in scene 1. We have excluded retrievals with less confidence and only discussed the retrievals simultaneously satisfying the two criteria with  $N_v > 10$  and  $\chi^2 < 1.5$ . Overall about 40% to 60% pixels are available after applying these two criteria over-estimated in this region. In scene 2, the region with  $\chi^2 > 3$  correlate closely to the thin clouds (Fig. 13), which influence nearby AOD and  $R_{rs}$  retrievals. For scene 3,  $\chi^2$  become larger than 2 when close to the coast. This may be due to complex water properties which are not well represented by the open water bio-optical model used in the simulation (Gao et al., 2019). The pixels near the coast are also potentially impacted by the the bottom effect and adjacency effect of land pixels.~~

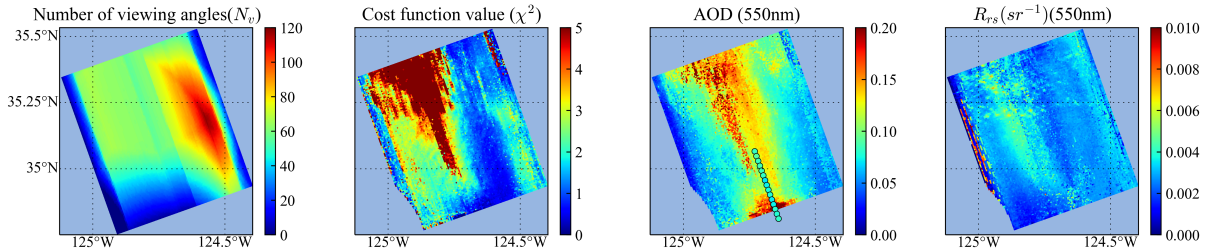

**Figure 15.** The number of viewing angles used in the retrieval( $N_v$ ), cost function value ( $\chi^2$ )~~and~~, the retrieved AOD (550 nm) ~~and~~  $R_{rs}$  (550nm) for all pixels in scene 1. ~~Under the condition of  $N_v > 10$ , 94% pixels are available; with  $\chi^2 < 1.5$ , 47% pixels are available; 41% pixels under both conditions.~~The HSRL AOD AODs at 532 nm are indicated by the colored dots in the AOD plot.

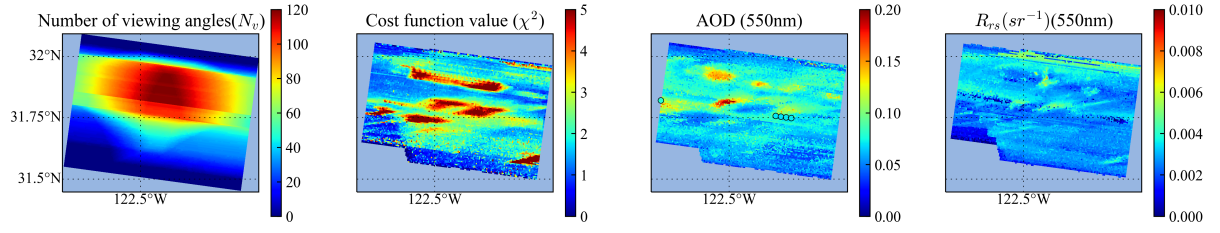

**Figure 16.** Same as Fig. 15 but for scene 22. For  $R_{rs}$ , 88% pixels with  $N_v > 10$ , 67% pixels with  $\chi^2 > 1.5$ , and 60% pixels under both conditions viewing angles at least  $40^\circ$  away from the solar specular reflection direction are used to avoid sunglint as shown in Fig. 13.

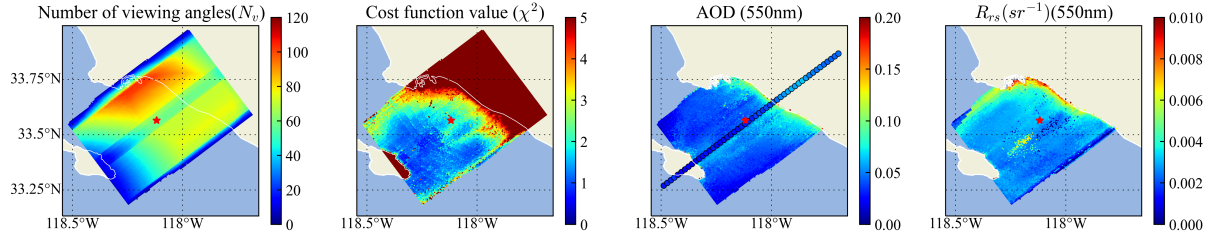

**Figure 17.** Same as Fig. 15 but for scene 3, 94% pixels with  $N_v > 10$ , 47% pixels with  $\chi^2 > 1.5$ , and 43% pixels under both conditions. The pixels with large  $\chi^2$  are mostly influenced by the land (upper region) and island (lower left). The retrieved AOD and  $R_{rs}$  over land pixels are not shown. The location of the AERONET USC SEAPRISM site is indicated by a red star symbol.

The AOD at 532nm from HSRL data product in all three scenes is in the range from 0.03 to 0.1 as shown in Fig. 18. After applying the two criteria in  $N_v$  and  $\chi^2$ , many pixels from AirHARP retrievals along the HSRL track are not available. To compare with the HSRL AOD along the in the along track direction, the retrieved AOD is averaged in the cross-track direction, the averaged values and its (550nm) is averaged within a box of 4 x 4 pixels (2.2km x 2.2km). The averaged AOD (550nm) values and the corresponding standard deviations are shown in Fig. 18. The averaged Pixels with  $N_v > 30$  and standard deviation of all pixels satisfying the criteria are also shown  $\chi^2 < 10$  are considered. The overall averaged values and their standard deviation are also computed and indicated in the plots. For scenes 1-3, the averaged The averaged HSRL AODs are 0.079, 0.071 and 0.037 for scenes 1 to 3. The averaged retrieved AOD(550nm) are 0.076, 0.066 and 0.052. The averaged HSRL AOD is 0.079, 0.072 and 0.038. The average AOD values retrieved from FastMAPOL and those from HSRL agree well for both scene 1 and scene 2, 0.096, 0.078 and 0.049 with relatively larger retrieval variation of 0.02 to 0.03. For scene 3, the average AOD value of the FastMAPOL algorithm 1, most  $\chi^2$  values are larger than 2, while for the other two scenes, most are less than 2 except for those pixels very close to cloud and coast. The retrieved AOD is larger than the averaged that of the HSRL AOD by 0.014. This may be due to complex water properties not well represented by the open water bio-optical model used in the simulation (Gao et al., 2019). Furthermore, the pixels near the coast are potentially impacted by the adjacency effect of land pixels. However it is challenge to investigate due to the small aerosol loadings. Furthermore, thin cirrus clouds were observed on Oct 23 (Knobelspiesse et al., 2020), which might further impact the accuracy of aerosol retrievals and require

future investigations. 0.03 in the overlapped region which may be influenced by the remaining effect of water condensation. In scene 2, the peaks of the retrieved AOD values correspond to the  $\chi^2$  values larger than 2, which are influenced by the nearby thin cloud. There are no overlapped pixels except the one associated with high AOD peaks, but the general trend of the retrieved AOD agree with the HSRL results. For scene 3, the retrieved AOD values agree well with the HSRL AOD with an average difference less than 0.01 and  $\chi^2$  mostly less than 2. However when the pixels are close to the coast, both  $\chi^2$  and AOD increased significantly as discussed previously.

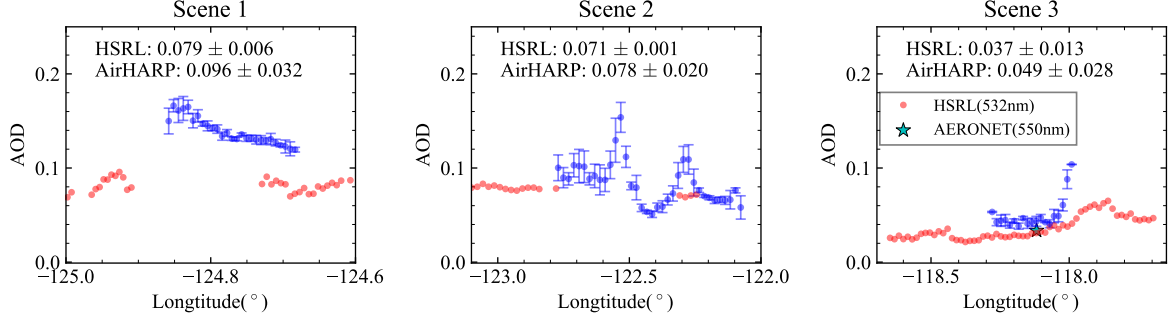

**Figure 18.** Comparison of the retrieved AOD (550 nm) from AirHARP measurement with the AOD (532 nm) from HSRL for Scenes 1 to 3. The AOD (550 nm) from AERONET USC\_SeaPRISM site is shown in scene 3. The AirHARP retrieved AOD is averaged over cross-track pixels with standard deviation as plotted by the shaded areas  $4 \times 4$  pixels ( $2.2\text{km} \times 2.2\text{km}$ ). The averaged and standard deviations of all pixels for both AirHARP retrievals and HSRL products are also shown provided in the text. Only pixels with  $N_v > 10$  and  $\chi^2 < 1.5$  are considered.

The retrieved  $R_{rs}$  at the four AirHARP bands. The  $R_{rs}$  from AERONET USC\_SeaPRISM site are indicated by the star symbols.

Fig. 19 shows the mean value and standard deviation of  $R_{rs}$  averaged for the cross-track pixels in the same way as AOD discussed above. There is similar spatial variation between the retrieved  $R_{rs}$  from AERONET USC\_SeaPRISM site are compared with the retrievals using the nearest wavelengths to the AirHARP bands and AOD. Pixels with large  $R_{rs}$  uncertainties are mostly associated with the large AOD uncertainties shown in Fig. 18. The  $R_{rs}$  values for scene 1 and 2 show a larger value of 0.005 to 0.007 at 440nm but reduced to 0.0025 for scene 3, which is closer to the coast. The for the three scenes are 0.0055, 0.0072, and 0.0030  $\text{sr}^{-1}$ , where the decrease of  $R_{rs}$  from scene 2 to scene 3 may be due to the increase of

CDOM as its spectra close to the coast as demonstrated in Fig. 5.

The AOD and  $R_{rs}$  spectra from AERONET USC\_SeaPRISM site on Oct 23, 2017, are shown in green triangles. The error bars indicate the daily average of the AERONET data product. The averaged AOD and  $R_{rs}$  from AirHARP retrievals within 1.1km from AERONET site are shown by blue circles.

The AERONET AOD is compared with the FastMAPOL retrieved AOD. Moreover,  $R_{rs}$  at scene 1 are likely to be under-estimated due to the large  $\chi^2$  and retrieved AOD over the center of scene 1. The averaged  $R_{rs}$  values at 550nm in Scene remain approximately constant with a value of  $0.0003 sr^{-1}$  over all three scenes.  $R_{rs}$  from AERONET USC SeaPRISM site are indicated in scene 3 of Fig. 18, and the whole AOD spectra are 19 and also compared in Fig. 20. The uncertainties of the AOD and  $R_{rs}$  from retrieval are estimated by the average of As discussed in Sec 2.2, we chose the minimum viewing zenith angle available from the measurements after removing the sunglint. The removal of sunglint improves the  $R_{rs}$  calculation for Scene 2  $\times 2$ -pixels (in  $1.1km \times 1.1 km$  box) around the AERONET site. The retrieved AODs at 440nm and 870nm agree well with the AERONET results as shown in Fig. 16. Moreover, we have ignored the  $\mathfrak{R}_0/\mathfrak{R}$  factor in Eq. 14 which may cause underestimation of the  $R_{rs}$  at the edge of the image where  $\theta_v$  can reach as large as  $60^\circ$ . However it is challenging to analyze its impact at large  $\theta_v$  angles.  $\mathfrak{R}_0/\mathfrak{R}$  has a strong dependency on wind speed, but the retrieved wind speeds from current retrievals show large uncertainties. Further work may require a better treatment of sunglint and improved accuracy in wind speed.

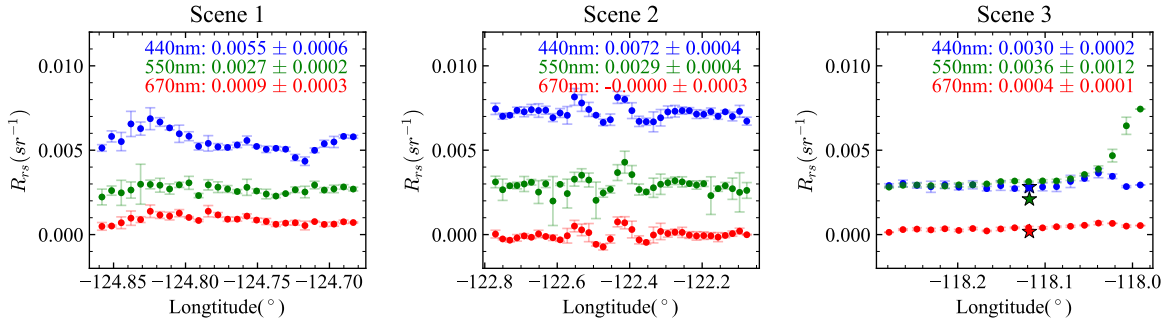

**Figure 19.** Similar to Fig. 18, the retrieved  $R_{rs}$  are computed for the AirHARP band of 440, 550, and 670nm bands. The averaged  $R_{rs}$  and its standard deviation are shown in the legends. For scene 3,  $R_{rs}$  from AERONET USC SeaPRISM site at wavelengths corresponding to AirHARP bands are indicated by the star symbols.

To better compare with AERONET results, we only considered the pixels with  $\chi^2 < 2$  and conducted the same averaging ( $4 \times 4$  pixels) around the USC SeaPRISM site for the retrieved AOD and  $R_{rs}$ . The averaged values and their standard deviations are plotted in Fig. 20. The overall retrieved AOD spectrum is similar to AERONET results with a difference smaller than 0.01. The results are similar to the retrieval results from the Research Scanning Polarimeter as reported by Gao et al. (2020). The difference between the HSRL AOD at 532nm and the AirHARP retrieved AOD near the AERONET site and is smaller than the one shown in the Scene 3 of Fig. 18, which suggests larger differences are contributed by the pixels further away. The retrieved  $R_{rs}$  agrees well with the AERONET  $R_{rs}$  with a value slightly larger than the AERONET results at 410nm and 550nm by 0.0005 and 0.0006  $sr^{-1}$ . The retrieved  $R_{rs}$  has a small negative value at 670nm, lower than AERONET by 0.0007  $sr^{-1}$ . Their difference at 868 is 0.0002  $sr^{-1}$ . There are larger uncertainties when larger spatial box is considered, difference less than 0.001  $sr^{-1}$ . Note that this study is done with the AirHARP measurement with possible AirHARP measurement uncertainty of 3%



uncertainties in the reflectance measurement in reflectance, which may impact the accuracy in the comparison between the retrieval and in-situ measurements atmospheric correction accuracy.

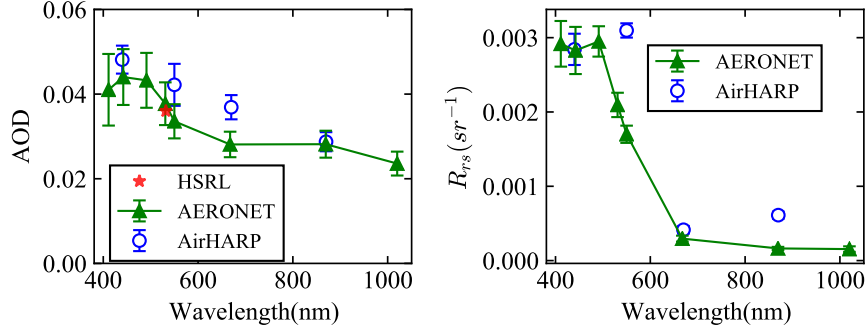

**Figure 20.** Comparisons of the AOD and  $R_{rs}$  from AirHARP retrievals with AERONET products. The retrieval results are averaged with  $4 \times 4$  pixels ( $2.2\text{km} \times 2.2\text{ km}$ ) around the AERONET USC SeaPRISM site. This is similar to Fig. 18 and 19 with error bars indicating the standard deviations, but only pixels with  $\chi^2 < 2$  are considered. The AERONET AOD and  $R_{rs}$  spectra are taken from Oct 23, 2017 with the error bars indicating daily variations. HSRL AOD at 532nm is also shown.

The complete retrieval results, including the aerosol microphysical properties, wind speed, Chla and atmospheric correction related datasets, are provided in Data availability. The retrieval uncertainties for aerosol microphysical properties are relatively large due to the small aerosol optical depths. Chla retrievals are sensitive to the aerosol retrievals, and are more challenging to retrieve accurately at small values as discussed in Sec 4.

## 6 Discussion

The NN model greatly improved the speed of the forward model used in the iterative optimization approach and boosted the efficiency of the FastMAPOL retrievals. The average retrieval speed for one pixel with FastMAPOL is approximately 2.6-3 seconds with a single CPU core, or approximately 0.3 seconds with a GPU using the same hardware as mentioned in Sect 3.3. Comparing to the retrieval speed of approximately 1 hour per pixel using conventional radiative transfer forward model, the computational acceleration is  $10^3$  times faster with CPU or  $10^4$  times with GPU processors. Meanwhile, the NN model maintains a high accuracy as shown in Table 3 and Table 4. For retrieval algorithms running radiative transfer simulation, the accuracy is often tuned down to reduce simulation time. By training a NN, however, the high accuracy of the radiative transfer model simulation can be achieved, as has been demonstrated in this work. Thus, despite the one time high computational costs in generating the training datasets and conducting the training, the trained NN can be applied efficiently to large observational datasets in the retrieval algorithm.

In the retrieval of the AirHARP field measurement, each pixel has multiple viewing angles that are aggregated from measurements at different times with slightly different solar zenith angles. The NN used in FastMAPOL computes the polarimetric



measurement for specific solar zenith angles for each viewing direction, and therefore, the variation of the solar zenith angle can be captured. These effects may be small for AirHARP measurement in ACEPOL, with a maximum solar zenith angle difference within 0.6 degrees. However, this capability can help to minimize the impacts of the solar angle for HARP2 in space-borne measurements, which can reach to a maximum difference of  $1.5^\circ$  for HARP2 observations.

- 5 With the efficient retrievals from FastMAPOL, we have discussed the retrieval performance and uncertainties for the aerosol properties, including AOD, SSA, refractive index, and particle sizes. Since the AirHARP measurements share many similar characteristics with HARP2 as planned for the PACE mission, the knowledge from the retrieval analysis can help to understand the retrieval performance for the HARP2 instrument in space-borne measurements. Note that HARP2 is likely to have ~~high~~ higher accuracy due to the onboard calibration capability and the potential to conduct cross-calibration with the OCI instrument.
- 10 For the development of the NN forward model for space-borne measurements, similar training procedures can be applied with the sensor altitude at the top of the atmosphere instead of the aircraft altitude used in this study. Due to the impact of retrieval capability by geometry (Fougnie et al., 2020), solar and viewing geometries according to the PACE orbits need to be considered.

- The water leaving reflectance is obtained from the atmospheric correction process using the aerosol and ocean properties
- 15 retrieved from the AirHARP measurements, and a similar procedure can be applied to future HARP2 retrievals. Since the hyperspectral OCI in PACE will provide high accuracy measurements, the retrieved information can be applied to OCI and therefore assist hyperspectral atmosphere corrections as demonstrated by ~~Gao et al. (2020);~~ Gao et al. (2020); Hannadige et al. (2021). However, aerosol retrieval and atmospheric correction are challenging in the UV spectral range (Remer et al., 2019a). For the ocean bio-optical model in this study, the water properties are modeled as open ocean waters parameterized by a single Chla
- 20 value. For complex coastal water, complex bio-optical models are preferred in the retrieval of both accurate aerosol properties and water leaving signals as demonstrated by Gao et al. (2019).

## 7 Conclusions

- We have demonstrated the application of a NN for highly accurate forward model calculations of polarimetric measurements for AirHARP. Additional NN models were used to conduct atmospheric correction. These models are used in the FastMAPOL
- 25 joint retrieval algorithm to conduct simultaneous aerosol property and water leaving signal retrieval. Applications to both the synthetic AirHARP data and field measurements from ACEPOL are discussed. The uncertainties of the retrieved aerosol properties and remote sensing reflectance are discussed for different aerosol loadings. These results from AirHARP retrievals can help to evaluate the retrieval capabilities for the HARP2 instrument on PACE. In application to field measurements from ACEPOL, the impacts of the number of viewing angles and the value of cost function to the retrieval quality are discussed. Further
- 30 comparison with the HSRL and AERONET OC data shows good performance in the retrieval of AOD and remote sensing reflectance. Furthermore, the NN forward model and the associated retrieval algorithm enable fast and practical retrievals of the polarimetric measurement, thus making the algorithm practical for analysis of large data volumes expected from space-borne

imagers such as HARP2. The experience and methodology can be used to help the algorithm development of other satellite instruments in polarimetric remote sensing.

*Acknowledgements.* The authors would like to thank the ACEPOL team for conducting the field campaign and providing the data, the Oregon State University and the University of Southern California teams for maintaining the AERONET USC\_SEAPRISM site. M. Gao would like to thank Frederick Patt, Andy Sayer and George Kattawar for constructive discussions, NASA Ocean Biology Processing Group (OBPG) system team for support in High Performance Computing (HPC), and NASA Advanced Software Technologies Group (ATSG) for ~~training in machine learning~~ machine learning trainings. We appreciated the constructive comments from the two reviewers.

Financial Support:

Meng Gao, Bryan A. Franz, Kirk Knobelspiesse, Brian Cairns, Amir Ibrahim, Joel Gales and P. Jeremy Werdell have been supported by the NASA PACE project. Peng-Wang Zhai has been supported by NASA (grants 80NSSC18K0345 and 80NSSC20M0227). Funding for the ACEPOL field campaign came from NASA (ACE and CALIPSO missions) and SRON. Part of this work has been funded by the NWO/NSO project ACEPOL (project no. ALW-GO/16-09). The ACEPOL campaign has been supported by the Radiation Sciences Program.

*Competing interests.* The authors declare no conflict of interest.

*Data availability.* The data files for AirHARP and HSRL-2 used in this study are available from the ACEPOL website (<https://www-air.larc.nasa.gov/cgi-bin/ArcView/acepol>, ACEPOL team, 2020). Complete retrieval results as well as data related to atmospheric correction from the three AirHARP scenes discussed in Sect. 5 are available from NASA Open Data Portal: [https://data.nasa.gov/Earth-Science/FastMAPOL\\_ACEPOL\\_AIRHARP\\_L2/8b9y-7rgh](https://data.nasa.gov/Earth-Science/FastMAPOL_ACEPOL_AIRHARP_L2/8b9y-7rgh).

*Author contributions.* MG, BAF, KK, and PWZ formulated the original concept for this study. MG developed the NN model and generated the scientific data. PWZ developed the radiative transfer code. KK, PWZ, BC, OH and YH advised on the uncertainty model and retrieval algorithm. BAF, AI and PJW advised on the atmospheric correction. KK, AI and YH advised on the NN model. JG supported the parallel computing of the training data. VM, XX, BM and AP provided and advised on the AirHARP data. RF and SB provided and advised on the HSRL-2 data. All authors participated the reviewing and editing of this paper.

## Appendix A: Neural networks for AOD and SSA

As summarized in Table 3, we have discussed the NNs used to represent the total reflectance ( $\rho_t^f$ ) and DoLP ( $P_t^f$ ) which are then used as the forward model in the retrieval algorithm. Using the retrieved aerosol parameters, NNs for  $\rho_{t,atms+sf}^f$  and  $\left[\frac{C_{BRDF}}{T_{at}t_u}\right]$  are used to compute remote sensing reflectance. To expedite and simplify the calculation of aerosol single scattering properties such as AOD and SSA as discussed in Section Sect. 4, we developed additional four NNs to represent the AOD and

SSA for both fine and coarse modes, respectively. These NNs are only used to analyze the retrieved aerosol properties and are not used in the retrieval process. The NN architectures and accuracy are shown in Table A1. The input parameters for the fine mode SSA and AOD are the three submode volume densities, and the real and imaginary parts of refractive index, with a total of 5 parameter. For coarse mode aerosols, there are a total of 4 parameters with only two submodes used. The outputs are the AOD and SSA at the four AirHARP bands.

A total of 10,000 training data points are generated in the same way as in [Section-Sect. 3.1](#) using the Lorenz-Mie code discussed in [Section-Sect. 2](#). The NN model accuracy is evaluated with additional 1000 data points not used in the training. As shown in Table A1, the accuracy is much smaller than the retrieval uncertainties shown in Figure 9, therefore the NNs for AOD and SSA provide sufficient accuracy to evaluate the aerosol single scattering properties.

With the fine and coarse mode AOD and SSA evaluated, the total AOD and SSA can be derived. The total AOD ( $\tau_t$ ) is the summation of the fine and coarse mode AODs as

$$\tau_t = \tau_f + \tau_c \tag{A1}$$

where  $\tau_f$  and  $\tau_c$  are the fine and coarse mode AODs. The total (or averaged) SSA ( $\omega_t$ ) is defined as the ratio of the total scattering cross-section and the total extinction cross-section for both fine and coarse modes, which can be computed as

$$\omega_t = \frac{\tau_f \omega_f + \tau_c \omega_c}{\tau_f + \tau_c}, \tag{A2}$$

where  $\omega_f$  and  $\omega_c$  are the fine and coarse mode SSA.

**Table A1.** The accuracy of the NN for the corresponding quantities in terms of the RMSE ( $\sigma$ ) between the NN predicted values and the truth values from the Lorenz-Mie calculations.

| Quantities  | NN architecture                  | $\sigma(440 \text{ nm})$ | $\sigma(550 \text{ nm})$ | $\sigma(660 \text{ nm})$ | $\sigma(870 \text{ nm})$ |
|-------------|----------------------------------|--------------------------|--------------------------|--------------------------|--------------------------|
| AOD(fine)   | $5 \times 64 \times 64 \times 4$ | 0.004                    | 0.003                    | 0.002                    | 0.001                    |
| AOD(coarse) | $4 \times 64 \times 64 \times 4$ | 0.001                    | 0.001                    | 0.001                    | 0.001                    |
| SSA(fine)   | $5 \times 64 \times 64 \times 4$ | 0.002                    | 0.003                    | 0.004                    | 0.006                    |
| SSA(coarse) | $4 \times 64 \times 64 \times 4$ | 0.01                     | 0.01                     | 0.01                     | 0.01                     |

## References

- Aggarwal, C. C.: Neural Networks and Deep Learning: A Textbook, Springer, 2018.
- Anderson, G., Clough, S., Kneizys, F., Chetwynd, J., and Shettle, E.: AFGL Atmospheric Constituent Profiles (0.120km), Air Force Geophysics Lab., Hanscom AFB, MA (USA), 1986.
- 5 Baydin, A. G., Pearlmutter, B. A., Radul, A. A., and Siskind, J. M.: Automatic differentiation in machine learning: a survey, *Journal of Machine Learning Research*, 18, 1–43, 2018.
- Bogumil, K., Orphal, J., Homann, T., Voigt, S., Spietz, P., Fleischmann, O., Vogel, A., Hartmann, M., Kromminga, H., Bovensmann, H., Frerick, J., and Burrows, J.: Measurements of molecular absorption spectra with the SCIAMACHY pre-flight model: instrument characterization and reference data for atmospheric remote-sensing in the 230–2380 nm region, *Journal of Photochemistry and Photobiology A: Chemistry*, 157, 167–184, [https://doi.org/https://doi.org/10.1016/S1010-6030\(03\)00062-5](https://doi.org/https://doi.org/10.1016/S1010-6030(03)00062-5), <https://www.sciencedirect.com/science/article/pii/S1010603003000625>, atmospheric Photochemistry, 2003.
- 10 Boucher, O., Randall, D., Artaxo, P., Bretherton, C., Feingold, G., Forster, P., Kerminen, V.-M., Kondo, Y., Liao, H., Lohmann, U., Rasch, P., Satheesh, S., S.Sherwood, Stevens, B., and Zhang, X.: Climate Change 2013: The Physical Science Basis. Contribution of Working Group I to the Fifth Assessment Report of the Intergovernmental Panel on Climate Change [Stocker, T.F., D. Qin, G.-K. Plattner, M. Tignor, S.K. Allen, J. Boschung, A. Nauels, Y. Xia, V. Bex and P.M. Midgley (eds.)], chap. Clouds and Aerosols, pp. pp. 571–658., Cambridge University Press, Cambridge, United Kingdom and New York, NY, USA, <https://doi.org/doi:10.1017/CBO9781107415324.016>, 2013.
- 15 Branch, M. A., Coleman, T. F., and Li, Y.: A Subspace, Interior, and Conjugate Gradient Method for Large-Scale Bound-Constrained Minimization Problems, *SIAM Journal on Scientific Computing*, 21, 1–23, <https://doi.org/10.1137/S1064827595289108>, <https://doi.org/10.1137/S1064827595289108>, 1999.
- 20 Buehler, S. A., Eriksson, P., Kuhn, T., von Engeln, A., and Verdes, C.: ARTS, the atmospheric radiative transfer simulator, *Journal of Quantitative Spectroscopy and Radiative Transfer*, 91, 65–93, 2005.
- Burton, S. P., Hair, J. W., Kahnert, M., Ferrare, R. A., Hostetler, C. A., Cook, A. L., Harper, D. B., Berkoff, T. A., Seaman, S. T., Collins, J. E., Fenn, M. A., and Rogers, R. R.: Observations of the spectral dependence of linear particle depolarization ratio of aerosols using NASA Langley airborne High Spectral Resolution Lidar, *Atmospheric Chemistry and Physics*, 15, 13 453–13 473, [https://doi.org/10.5194/acp-](https://doi.org/10.5194/acp-15-13453-2015)
- 25 15-13453-2015, <https://www.atmos-chem-phys.net/15/13453/2015/>, 2015.
- Burton, S. P., Chemyakin, E., Liu, X., Knobelspiesse, K., Stamnes, S., Sawamura, P., Moore, R. H., Hostetler, C. A., and Ferrare, R. A.: Information content and sensitivity of the  $3\beta + 2\alpha$  lidar measurement system for aerosol microphysical retrievals, *Atmospheric Measurement Techniques*, 9, 5555–5574, <https://doi.org/10.5194/amt-9-5555-2016>, <https://www.atmos-meas-tech.net/9/5555/2016/>, 2016.
- Cairns, B., E. Russell, E., and D. Travis, L.: Research Scanning Polarimeter: calibration and ground-based measurements, *Proc.SPIE*, 3754, 186–196, <https://doi.org/10.1117/12.366329>, <https://doi.org/10.1117/12.366329>, 1999.
- 30 Chen, C., Dubovik, O., Fuertes, D., Litvinov, P., Lapyonok, T., Lopatin, A., Ducos, F., Derimian, Y., Herman, M., Tanré, D., Remer, L. A., Lyapustin, A., Sayer, A. M., Levy, R. C., Hsu, N. C., Descloitres, J., Li, L., Torres, B., Karol, Y., Herrera, M., Herreras, M., Aspetsberger, M., Wanzenboeck, M., Bindreiter, L., Marth, D., Hangler, A., and Federspiel, C.: Validation of GRASP algorithm product from POLDER-PARASOL data and assessment of multi-angular polarimetry potential for aerosol monitoring, *Earth System Science Data Discussions*, 12, 3573–3620, <https://doi.org/10.5194/essd-2020-224>, <https://essd.copernicus.org/preprints/essd-2020-224/>, 2020.
- 35

- Chowdhary, J., Cairns, B., Mishchenko, M., and Travis, L.: Retrieval of aerosol properties over the ocean using multispectral and multiangle Photopolarimetric measurements from the Research Scanning Polarimeter, *Geophysical Research Letters*, 28, 243–246, <https://doi.org/10.1029/2000GL011783>, <https://agupubs.onlinelibrary.wiley.com/doi/abs/10.1029/2000GL011783>, 2001.
- Chowdhary, J., Cairns, B., Mishchenko, M. I., Hobbs, P. V., Cota, G. F., Redemann, J., Rutledge, K., Holben, B. N., and Russell, E.: Retrieval of Aerosol Scattering and Absorption Properties from Photopolarimetric Observations over the Ocean during the CLAMS Experiment, *Journal of the Atmospheric Sciences*, 62, 1093–1117, <https://doi.org/10.1175/JAS3389.1>, <https://doi.org/10.1175/JAS3389.1>, 2005.
- d’Almeida, G. A., Koepke, P., and Shettle, E. P.: *Atmospheric aerosols : global climatology and radiative characteristics*, A Deepak Pub, 1991.
- Di Noia, A., Hasekamp, O. P., van Harten, G., Rietjens, J. H. H., Smit, J. M., Snik, F., Henzing, J. S., de Boer, J., Keller, C. U., and Volten, H.: Use of neural networks in ground-based aerosol retrievals from multi-angle spectropolarimetric observations, *Atmospheric Measurement Techniques*, 8, 281–299, <https://doi.org/10.5194/amt-8-281-2015>, <https://amt.copernicus.org/articles/8/281/2015/>, 2015.
- Di Noia, A., Hasekamp, O. P., Wu, L., van Diedenhoven, B., Cairns, B., and Yorks, J. E.: Combined neural network/Phillips–Tikhonov approach to aerosol retrievals over land from the NASA Research Scanning Polarimeter, *Atmospheric Measurement Techniques*, 10, 4235–4252, <https://doi.org/10.5194/amt-10-4235-2017>, <https://amt.copernicus.org/articles/10/4235/2017/>, 2017.
- Dierssen, H. M. and Randolph, K.: *Remote Sensing of Ocean Color*, pp. 439–472, Springer New York, New York, NY, [https://doi.org/10.1007/978-1-4614-5684-1\\_18](https://doi.org/10.1007/978-1-4614-5684-1_18), [https://doi.org/10.1007/978-1-4614-5684-1\\_18](https://doi.org/10.1007/978-1-4614-5684-1_18), 2013.
- Diner, D. J., Xu, F., Garay, M. J., Martonchik, J. V., Rheingans, B. E., Geier, S., Davis, A., Hancock, B. R., Jovanovic, V. M., Bull, M. A., Capraro, K., Chipman, R. A., and McClain, S. C.: The Airborne Multiangle SpectroPolarimetric Imager (AirMSPI): a new tool for aerosol and cloud remote sensing, *Atmospheric Measurement Techniques*, 6, 2007–2025, <https://doi.org/10.5194/amt-6-2007-2013>, <https://www.atmos-meas-tech.net/6/2007/2013/>, 2013.
- Diner, D. J., Boland, S. W., Brauer, M., Bruegge, C., Burke, K. A., Chipman, R., Girolamo, L. D., Garay, M. J., Hasheminassab, S., Hyer, E., Jerrett, M., Jovanovic, V., Kalashnikova, O. V., Liu, Y., Lyapustin, A. I., Martin, R. V., Nastan, A., Ostro, B. D., Ritz, B., Schwartz, J., Wang, J., and Xu, F.: Advances in multiangle satellite remote sensing of speciated airborne particulate matter and association with adverse health effects: from MISR to MAIA, *Journal of Applied Remote Sensing*, 12, 1 – 22, <https://doi.org/10.1117/1.JRS.12.042603>, <https://doi.org/10.1117/1.JRS.12.042603>, 2018.
- Dubovik, O., Sinyuk, A., Lapyonok, T., Holben, B. N., Mishchenko, M., Yang, P., Eck, T. F., Volten, H., Muñoz, O., Veihelmann, B., van der Zande, W. J., Leon, J.-F., Sorokin, M., and Slutsker, I.: Application of spheroid models to account for aerosol particle nonsphericity in remote sensing of desert dust, *Journal of Geophysical Research: Atmospheres*, 111, <https://doi.org/10.1029/2005JD006619>, <https://agupubs.onlinelibrary.wiley.com/doi/abs/10.1029/2005JD006619>, 2006.
- Dubovik, O., Herman, M., Holdak, A., Lapyonok, T., Tanré, D., Deuzé, J. L., Ducos, F., Sinyuk, A., and Lopatin, A.: Statistically optimized inversion algorithm for enhanced retrieval of aerosol properties from spectral multi-angle polarimetric satellite observations, *Atmospheric Measurement Techniques*, 4, 975–1018, <https://doi.org/10.5194/amt-4-975-2011>, <https://www.atmos-meas-tech.net/4/975/2011/>, 2011.
- Dubovik, O., Lapyonok, T., Litvinov, P., Herman, M., Fuertes, D., Ducos, F., Lopatin, A., Chaikovsky, A., Torres, B., Derimian, Y., Huang, X., Aspetsberger, M., and Federspiel, C.: GRASP: a versatile algorithm for characterizing the atmosphere, *SPIE Newsroom*, <https://doi.org/10.1117/2.1201408.005558>, 2014.
- Dubovik, O., Li, Z., Mishchenko, M. I., Tanré, D., Karol, Y., Bojkov, B., Cairns, B., Diner, D. J., Espinosa, W. R., Goloub, P., Gu, X., Hasekamp, O., Hong, J., Hou, W., Knobelspiesse, K. D., Landgraf, J., Li, L., Litvinov, P., Liu, Y., Lopatin, A., Marbach, T., Maring, H., Martins, V., Meijer, Y., Milinevsky, G., Mukai, S., Parol, F., Qiao, Y., Remer, L., Rietjens, J., Sano, I., Stammes, P., Stammes,

- S., Sun, X., Tabary, P., Travis, L. D., Waquet, F., Xu, F., Yan, C., and Yin, D.: Polarimetric remote sensing of atmospheric aerosols: Instruments, methodologies, results, and perspectives, *Journal of Quantitative Spectroscopy and Radiative Transfer*, 224, 474 – 511, <https://doi.org/https://doi.org/10.1016/j.jqsrt.2018.11.024>, <http://www.sciencedirect.com/science/article/pii/S0022407318308409>, 2019.
- Fan, C., Fu, G., Di Noia, A., Smit, M., H.H. Rietjens, J., A. Ferrare, R., Burton, S., Li, Z., and P. Hasekamp, O.: Use of A Neural Network-  
5 Based Ocean Body Radiative Transfer Model for Aerosol Retrievals from Multi-Angle Polarimetric Measurements, *Remote Sensing*, 11, <https://doi.org/10.3390/rs11232877>, <https://www.mdpi.com/2072-4292/11/23/2877>, 2019.
- Fan, Y., Li, W., Gatebe, C. K., Jamet, C., Zibordi, G., Schroeder, T., and Stamnes, K.: Atmospheric correction over coastal waters using multilayer neural networks, *Remote Sensing of Environment*, 199, 218–240, <http://www.sciencedirect.com/science/article/pii/S0034425717303310>, 2017.
- 10 Fougnie, B., Marbach, T., Lacan, A., Lang, R., Schlüssel, P., Poli, G., Munro, R., and Couto, A. B.: The multi-viewing multi-channel multi-polarisation imager – Overview of the 3MI polarimetric mission for aerosol and cloud characterization, *Journal of Quantitative Spectroscopy and Radiative Transfer*, 219, 23 – 32, <https://doi.org/https://doi.org/10.1016/j.jqsrt.2018.07.008>, <http://www.sciencedirect.com/science/article/pii/S002240731830373X>, 2018.
- Fougnie, B., Chimot, J., Vázquez-Navarro, M., Marbach, T., and Bojkov, B.: Aerosol retrieval from space – how does geometry of acquisition impact our ability to characterize aerosol properties, *Journal of Quantitative Spectroscopy and Radiative Transfer*, 256, 107 304, <https://doi.org/https://doi.org/10.1016/j.jqsrt.2020.107304>, <http://www.sciencedirect.com/science/article/pii/S0022407320305860>, 2020.
- 15 Frouin, R. J., Franz, B. A., Ibrahim, A., Knobelspiesse, K., Ahmad, Z., Cairns, B., Chowdhary, J., Dierssen, H. M., Tan, J., Dubovik, O., Huang, X., Davis, A. B., Kalashnikova, O., Thompson, D. R., Remer, L. A., Boss, E., Coddington, O., Deschamps, P.-Y., Gao, B.-C., Gross, L., Hasekamp, O., Omar, A., Pelletier, B., Ramon, D., Steinmetz, F., and Zhai, P.-W.: Atmospheric Correction of Satellite Ocean-  
20 Color Imagery During the PACE Era, *Frontiers in Earth Science*, 7, <https://doi.org/10.3389/feart.2019.00145>, <https://www.frontiersin.org/article/10.3389/feart.2019.00145>, 2019.
- Fu, G. and Hasekamp, O.: Retrieval of aerosol microphysical and optical properties over land using a multimode approach, *Atmospheric Measurement Techniques*, 11, 6627–6650, <https://doi.org/10.5194/amt-11-6627-2018>, <https://www.atmos-meas-tech.net/11/6627/2018/>, 2018.
- 25 Fu, G., Hasekamp, O., Rietjens, J., Smit, M., Di Noia, A., Cairns, B., Wasilewski, A., Diner, D., Xu, F., Knobelspiesse, K., Gao, M., da Silva, A., Burton, S., Hostetler, C., Hair, J., and Ferrare, R.: Aerosol retrievals from different polarimeters during the ACEPOL campaign using a common retrieval algorithm, *Atmospheric Measurement Techniques Discussions*, 13, 553–573, <https://doi.org/https://doi.org/10.5194/amt-13-553-2020>, 2020.
- Gao, M., Zhai, P.-W., Franz, B., Hu, Y., Knobelspiesse, K., Werdell, P. J., Ibrahim, A., Xu, F., and Cairns, B.: Retrieval of aerosol properties and water-leaving reflectance from multi-angular polarimetric measurements over coastal waters, *Opt. Express*, 26, 8968–8989, <https://doi.org/10.1364/OE.26.008968>, <http://www.opticsexpress.org/abstract.cfm?URI=oe-26-7-8968>, 2018.
- 30 Gao, M., Zhai, P.-W., Franz, B. A., Hu, Y., Knobelspiesse, K., Werdell, P. J., Ibrahim, A., Cairns, B., and Chase, A.: Inversion of multiangular polarimetric measurements over open and coastal ocean waters: a joint retrieval algorithm for aerosol and water-leaving radiance properties, *Atmospheric Measurement Techniques*, 12, 3921–3941, <https://doi.org/10.5194/amt-12-3921-2019>, <https://www.atmos-meas-tech.net/12/3921/2019/>, 2019.
- 35 Gao, M., Zhai, P.-W., Franz, B. A., Knobelspiesse, K., Ibrahim, A., Cairns, B., Craig, S. E., Fu, G., Hasekamp, O., Hu, Y., and Werdell, P. J.: Inversion of multiangular polarimetric measurements from the ACEPOL campaign: an application of improving aerosol property and

- hyperspectral ocean color retrievals, *Atmospheric Measurement Techniques*, 13, 3939–3956, <https://doi.org/10.5194/amt-13-3939-2020>, <https://amt.copernicus.org/articles/13/3939/2020/>, 2020.
- Gelaro, R., McCarty, W., Suárez, M. J., Todling, R., Molod, A., Takacs, L., Randles, C. A., Darmenov, A., Bosilovich, M. G., Reichle, R., Wargan, K., Coy, L., Cullather, R., Draper, C., Akella, S., Buchard, V., Conaty, A., da Silva, A. M., Gu, W., Kim, G.-K., Koster, R., Lucchesi, R., Merkova, D., Nielsen, J. E., Partyka, G., Pawson, S., Putman, W., Rienecker, M., Schubert, S. D., Sienkiewicz, M., and Zhao, B.: The Modern-Era Retrospective Analysis for Research and Applications, Version 2 (MERRA-2), *Journal of Climate*, 30, 5419–5454, <https://doi.org/10.1175/JCLI-D-16-0758.1>, <https://doi.org/10.1175/JCLI-D-16-0758.1>, 2017.
- Giles, D. M., Sinyuk, A., Sorokin, M. G., Schafer, J. S., Smirnov, A., Slutsker, I., Eck, T. F., Holben, B. N., Lewis, J. R., Campbell, J. R., Welton, E. J., Korkin, S. V., and Lyapustin, A. I.: Advancements in the Aerosol Robotic Network (AERONET) Version 3 database – automated near-real-time quality control algorithm with improved cloud screening for Sun photometer aerosol optical depth (AOD) measurements, *Atmospheric Measurement Techniques*, 12, 169–209, <https://doi.org/10.5194/amt-12-169-2019>, <https://www.atmos-meas-tech.net/12/169/2019/>, 2019.
- Goodfellow, I., Bengio, Y., and Courville, A.: *Deep Learning.*, MIT Press, 2016.
- Gordon, I., Rothman, L., Hill, C., Kochanov, R., Tan, Y., Bernath, P., Birk, M., Boudon, V., Campargue, A., Chance, K., Drouin, B., Flaud, J.-M., Gamache, R., Hodges, J., Jacquemart, D., Perevalov, V., Perrin, A., Shine, K., Smith, M.-A., Tennyson, J., Toon, G., Tran, H., Tyuterev, V., Barbe, A., Császár, A., Devi, V., Furtenbacher, T., Harrison, J., Hartmann, J.-M., Jolly, A., Johnson, T., Karman, T., Kleiner, I., Kyuberis, A., Loos, J., Lyulin, O., Massie, S., Mikhailenko, S., Moazzen-Ahmadi, N., Müller, H., Naumenko, O., Nikitin, A., Polyansky, O., Rey, M., Rotger, M., Sharpe, S., Sung, K., Starikova, E., Tashkun, S., Auwera, J. V., Wagner, G., Wilzewski, J., Wcisło, P., Yu, S., and Zak, E.: The HITRAN2016 molecular spectroscopic database, *Journal of Quantitative Spectroscopy and Radiative Transfer*, 203, 3–69, <https://doi.org/https://doi.org/10.1016/j.jqsrt.2017.06.038>, <https://www.sciencedirect.com/science/article/pii/S0022407317301073>, HITRAN2016 Special Issue, 2017.
- Gorshchev, V., Serdyuchenko, A., Weber, M., Chehade, W., and Burrows, J. P.: High spectral resolution ozone absorption cross-sections &ndash; Part 1: Measurements, data analysis and comparison with previous measurements around 293 K, *Atmospheric Measurement Techniques*, 7, 609–624, <https://doi.org/10.5194/amt-7-609-2014>, <https://amt.copernicus.org/articles/7/609/2014/>, 2014.
- Hair, J. W., Hostetler, C. A., Cook, A. L., Harper, D. B., Ferrare, R. A., Mack, T. L., Welch, W., Izquierdo, L. R., and Hovis, F. E.: Airborne High Spectral Resolution Lidar for profiling aerosol optical properties, *Applied Optics*, 47, 6734–6752, <https://doi.org/10.1364/AO.47.006734>, <http://ao.osa.org/abstract.cfm?URI=ao-47-36-6734>, 2008.
- Hannadige, N. K., Zhai, P.-W., Gao, M., Franz, B. A., Hu, Y., Knobelspiesse, K., Werdell, P. J., Ibrahim, A., Cairns, B., and Hasekamp, O. P.: Atmospheric correction over the ocean for hyperspectral radiometers using multi-angle polarimetric retrievals, *Opt. Express*, 29, 4504–4522, <https://doi.org/10.1364/OE.408467>, <http://www.opticsexpress.org/abstract.cfm?URI=oe-29-3-4504>, 2021.
- Hansen, J. E. and Travis, L. D.: Light scattering in planetary atmospheres, *Space Science Reviews*, 16, 527–610, <https://doi.org/10.1007/BF00168069>, 1974.
- Hasekamp, O. P. and Landgraf, J.: Retrieval of aerosol properties over land surfaces: capabilities of multiple-viewing-angle intensity and polarization measurements, *Appl. Opt.*, 46, 3332–3344, <https://doi.org/10.1364/AO.46.003332>, <http://ao.osa.org/abstract.cfm?URI=ao-46-16-3332>, 2007.
- Hasekamp, O. P., Litvinov, P., and Butz, A.: Aerosol properties over the ocean from PARASOL multiangle photopolarimetric measurements, *Journal of Geophysical Research: Oceans*, 116, D14 204, <https://doi.org/https://doi.org/10.1029/2010JD015469>, 2011.

- Hasekamp, O. P., Fu, G., Rusli, S. P., Wu, L., Noia, A. D., aan de Brugh, J., Landgraf, J., Smit, J. M., Rietjens, J., and van Amerongen, A.: Aerosol measurements by SPEXone on the NASA PACE mission: expected retrieval capabilities, *Journal of Quantitative Spectroscopy and Radiative Transfer*, 227, 170 – 184, <https://doi.org/https://doi.org/10.1016/j.jqsrt.2019.02.006>, <http://www.sciencedirect.com/science/article/pii/S0022407318308653>, 2019a.
- 5 Hasekamp, O. P., Gryspeerdt, E., and Quaas, J.: Analysis of polarimetric satellite measurements suggests stronger cooling due to aerosol-cloud interactions, *Nature Communications*, 10, 5405, <https://doi.org/10.1038/s41467-019-13372-2>, 2019b.
- Holben, B., Eck, T., Slutsker, I., Tanré, D., Buis, J., Setzer, A., Vermote, E., Reagan, J., Kaufman, Y., Nakajima, T., Lavenue, F., Jankowiak, I., and Smirnov, A.: AERONET—A Federated Instrument Network and Data Archive for Aerosol Characterization, *Remote Sensing of Environment*, 66, 1 – 16, [https://doi.org/https://doi.org/10.1016/S0034-4257\(98\)00031-5](https://doi.org/https://doi.org/10.1016/S0034-4257(98)00031-5), <http://www.sciencedirect.com/science/article/pii/S0034425798000315>, 1998.
- 10 Kawata, Y.: Circular polarization of sunlight reflected by planetary atmospheres, *Icarus*, 33, 217 – 232, [https://doi.org/https://doi.org/10.1016/0019-1035\(78\)90035-0](https://doi.org/https://doi.org/10.1016/0019-1035(78)90035-0), <http://www.sciencedirect.com/science/article/pii/0019103578900350>, 1978.
- Kingma, D. P. and Ba, J.: Adam: A Method for Stochastic Optimization, 2014.
- 15 Knobelspiesse, K., Cairns, B., Mishchenko, M., Chowdhary, J., Tsigaridis, K., van Diedenhoven, B., Martin, W., Ottaviani, M., and Alexandrov, M.: Analysis of fine-mode aerosol retrieval capabilities by different passive remote sensing instrument designs, *Optics Express*, 20, 21 457–21 484, <https://doi.org/10.1364/OE.20.021457>, <http://www.opticsexpress.org/abstract.cfm?URI=oe-20-19-21457>, 2012.
- Knobelspiesse, K., Barbosa, H. M. J., Bradley, C., Bruegge, C., Cairns, B., Chen, G., Chowdhary, J., Cook, A., Di Noia, A., van Diedenhoven, B., Diner, D. J., Ferrare, R., Fu, G., Gao, M., Garay, M., Hair, J., Harper, D., van Harten, G., Hasekamp, O., Helmlinger, M., Hostetler, C.,
- 20 Kalashnikova, O., Kupchock, A., Longo De Freitas, K., Maring, H., Martins, J. V., McBride, B., McGill, M., Norlin, K., Puthukkudy, A., Rheingans, B., Rietjens, J., Seidel, F. C., da Silva, A., Smit, M., Stamnes, S., Tan, Q., Val, S., Wasilewski, A., Xu, F., Xu, X., and Yorks, J.: The Aerosol Characterization from Polarimeter and Lidar (ACEPOL) airborne field campaign, *Earth System Science Data Discussions*, 2020, 1–38, <https://doi.org/10.5194/essd-2020-76>, <https://www.earth-syst-sci-data-discuss.net/essd-2020-76/>, 2020.
- Li, L., Dubovik, O., Derimian, Y., Schuster, G. L., Lapyonok, T., Litvinov, P., Ducos, F., Fuertes, D., Chen, C., Li, Z., Lopatin, A., Torres, B., and Che, H.: Retrieval of aerosol components directly from satellite and ground-based measurements, *Atmospheric Chemistry and Physics*, 19, 13 409–13 443, <https://doi.org/10.5194/acp-19-13409-2019>, <https://acp.copernicus.org/articles/19/13409/2019/>, 2019.
- Li, Z., Guo, J., Ding, A., Liao, H., Liu, J., Sun, Y., Wang, T., Xue, H., Zhang, H., and Zhu, B.: Aerosol and boundary-layer interactions and impact on air quality, *National Science Review*, 4, 810–833, <https://doi.org/10.1093/nsr/nwx117>, <https://doi.org/10.1093/nsr/nwx117>, 2017.
- 30 Li, Z., Hou, W., Hong, J., Zheng, F., Luo, D., Wang, J., Gu, X., and Qiao, Y.: Directional Polarimetric Camera (DPC): Monitoring aerosol spectral optical properties over land from satellite observation, *Journal of Quantitative Spectroscopy and Radiative Transfer*, 218, 21 – 37, <https://doi.org/https://doi.org/10.1016/j.jqsrt.2018.07.003>, <http://www.sciencedirect.com/science/article/pii/S002240731830253X>, 2018.
- Lin, H. W., Tegmark, M., and Rolnick, D.: Why Does Deep and Cheap Learning Work So Well?, *Journal of Statistical Physics*, 168, 1223–1247, <https://doi.org/10.1007/s10955-017-1836-5>, 2017.
- 35 Loshchilov, I. and Hutter, F.: Decoupled Weight Decay Regularization, *International Conference on Learning Representations*, 2019.
- Martins, J. V., Fernandez-Borda, R., McBride, B., Remer, L., and Barbosa, H. M. J.: The Harp Hype Ran Gular Imaging Polarimeter and the Need for Small Satellite Payloads with High Science Payoff for Earth Science Remote Sensing, in: *IGARSS 2018 - 2018 IEEE International Geoscience and Remote Sensing Symposium*, pp. 6304–6307, <https://doi.org/10.1109/IGARSS.2018.8518823>, 2018.



- McBride, B. A., Martins, J., Puthukuddy, A., Xu, X., Borda, R. F., Barbosa, H. M. J., Hasekamp, O., and Remer, L. A.: The Hyper-Angular Rainbow Polarimeter-2 (HARP-2): A wide FOV polarimetric imager for high resolution spatial and angular characterization of cloud and aerosol microphysics, *Proceedings of the 70th International Astronautical Congress.*, pp. IAC–19–B1.2.7, 2019.
- McBride, B. A., Martins, J. V., Barbosa, H. M. J., Birmingham, W., and Remer, L. A.: Spatial distribution of cloud droplet size properties from Airborne Hyper-Angular Rainbow Polarimeter (AirHARP) measurements, *Atmospheric Measurement Techniques Discussions*, 13, 1777–1796, <https://doi.org/https://doi.org/10.5194/amt-13-1777-2020>, <https://www.atmos-meas-tech-discuss.net/amt-2019-380/>, 2020.
- McGill, M., Hlavka, D., Hart, W., Scott, V. S., Spinhirne, J., and Schmid, B.: Cloud Physics Lidar: instrument description and initial measurement results, *Appl. Opt.*, 41, 3725–3734, <https://doi.org/10.1364/AO.41.003725>, <http://ao.osa.org/abstract.cfm?URI=ao-41-18-3725>, 2002.
- 10 Mishchenko, M. I. and Travis, L. D.: Satellite retrieval of aerosol properties over the ocean using polarization as well as intensity of reflected sunlight, *Journal of Geophysical Research: Atmospheres*, 102, 16 989–17 013, <https://doi.org/10.1029/96JD02425>, <https://agupubs.onlinelibrary.wiley.com/doi/abs/10.1029/96JD02425>, 1997.
- Mishchenko, M. I., Travis, L. D., and Lacis, A. A.: *Scattering, Absorption, and Emission of Light by Small Particles*, Cambridge University Press, 2002.
- 15 Mobley, C. D., Werdell, J., Franz, B., Ahmad, Z., and Bailey, S.: *Atmospheric Correction for Satellite Ocean Color Radiometry*, National Aeronautics and Space Administration, 2016.
- Moré, J. J.: The Levenberg-Marquardt algorithm: Implementation and theory, in: *Numerical Analysis*, edited by Watson, G. A., pp. 105–116, Springer Berlin Heidelberg, Berlin, Heidelberg, 1978.
- Morel, A. and Berthon, J.-F.: Surface pigments, algal biomass profiles, and potential production of the euphotic layer: Relationships reinvestigated in view of remote-sensing applications, *Limnology and Oceanography*, 34, 1545–1562, 1989.
- 20 Morel, A. and Gentili, B.: Diffuse reflectance of oceanic waters. III. Implication of bidirectionality for the remote-sensing problem, *Appl. Opt.*, 35, 4850–4862, <https://doi.org/10.1364/AO.35.004850>, <http://ao.osa.org/abstract.cfm?URI=ao-35-24-4850>, 1996.
- Morel, A., Antoine, D., and Gentili, B.: Bidirectional reflectance of oceanic waters: accounting for Raman emission and varying particle scatter ing phase function, *Appl. Opt.*, 2002.
- 25 Mukherjee, L., Zhai, P.-W., Gao, M., Hu, Y., A. Franz, B., and Werdell, P. J.: Neural Network Reflectance Prediction Model for Both Open Ocean and Coastal Waters, *Remote Sensing*, 12, <https://doi.org/10.3390/rs12091421>, <https://www.mdpi.com/2072-4292/12/9/1421>, 2020.
- Paszke, A., Gross, S., Massa, F., Lerer, A., Bradbury, J., Chanan, G., Killeen, T., Lin, Z., Gimelshein, N., Antiga, L., Desmaison, A., Kopf, A., Yang, E., DeVito, Z., Raison, M., Tejani, A., Chilamkurthy, S., Steiner, B., Fang, L., Bai, J., and Chintala, S.: PyTorch: An Imperative Style, High-Performance Deep Learning Library, *Advances in Neural Information Processing Systems* 32, pp. 8024–8035, <http://papers.neurips.cc/paper/9015-pytorch-an-imperative-style-high-performance-deep-learning-library.pdf>, 2019.
- 30 Plankton, Aerosol, Cloud, ocean Ecosystem (PACE) mission: The PACE Level 1C data format, [https://oceancolor.gsfc.nasa.gov/data/pace/PACE\\_L1C\\_Format\\_DRAFTv20200918.pdf](https://oceancolor.gsfc.nasa.gov/data/pace/PACE_L1C_Format_DRAFTv20200918.pdf), 2020.
- Platt, T., Hoepffner, N., Stuart, V., and Brown, C.: Why Ocean Colour? The Societal Benefits of Ocean-Colour Technology, *International Ocean Colour Coordinating Group (IOCCG)*, 2008.
- 35 Puthukkudy, A., Martins, J. V., Remer, L. A., Xu, X., Dubovik, O., Litvinov, P., McBride, B., Burton, S., and Barbosa, H. M. J.: Retrieval of aerosol properties from Airborne Hyper-Angular Rainbow Polarimeter (AirHARP) observations during ACEPOL 2017, *Atmospheric Measurement Techniques*, 13, 5207–5236, <https://doi.org/10.5194/amt-13-5207-2020>, <https://amt.copernicus.org/articles/13/5207/2020/>, 2020.

- Remer, L. A., Davis, A. B., Mattoo, S., Levy, R. C., Kalashnikova, O. V., Coddington, O., Chowdhary, J., Knobelspiesse, K., Xu, X., Ahmad, Z., Boss, E., Cairns, B., Dierssen, H. M., Diner, D. J., Franz, B., Frouin, R., Gao, B.-C., Ibrahim, A., Martins, J. V., Omar, A. H., Torres, O., Xu, F., and Zhai, P.-W.: Retrieving Aerosol Characteristics From the PACE Mission, Part 1: Ocean Color Instrument, *Frontiers in Earth Science*, 7, 152, <https://doi.org/10.3389/feart.2019.00152>, <https://www.frontiersin.org/article/10.3389/feart.2019.00152>, 2019a.
- 5 Remer, L. A., Knobelspiesse, K., Zhai, P.-W., Xu, F., Kalashnikova, O. V., Chowdhary, J., Hasekamp, O., Dubovik, O., Wu, L., Ahmad, Z., Boss, E., Cairns, B., Coddington, O., Davis, A. B., Dierssen, H. M., Diner, D. J., Franz, B., Frouin, R., Gao, B.-C., Ibrahim, A., Levy, R. C., Martins, J. V., Omar, A. H., and Torres, O.: Retrieving Aerosol Characteristics From the PACE Mission, Part 2: Multi-Angle and Polarimetry, *Frontiers in Environmental Science*, 7, 94, <https://doi.org/10.3389/fenvs.2019.00094>, <https://www.frontiersin.org/article/10.3389/fenvs.2019.00094>, 2019b.
- 10 Rietjens, J., Campo, J., Chanumolu, A., Smit, M., Nalla, R., Fernandez, C., Dingjan, J., van Amerongen, A., and Hasekamp, O.: Expected performance and error analysis for SPEXone, a multi-angle channelled spectropolarimeter for the NASA PACE mission, in: *Polarization Science and Remote Sensing IX*, edited by Craven, J. M., Shaw, J. A., and Snik, F., vol. 11132, pp. 34 – 47, International Society for Optics and Photonics, SPIE, <https://doi.org/10.1117/12.2530729>, <https://doi.org/10.1117/12.2530729>, 2019.
- Rogers, C.: *Inverse Methods for Atmospheric Sounding: Theory and Practice*, World Scientific World Scientific Publishing, 2000.
- 15 Seegers, B. N., Stumpf, R. P., Schaeffer, B. A., Loftin, K. A., and Werdell, P. J.: Performance metrics for the assessment of satellite data products: an ocean color case study, *Opt. Express*, 26, 7404–7422, <https://doi.org/10.1364/OE.26.007404>, <http://www.opticsexpress.org/abstract.cfm?URI=oe-26-6-7404>, 2018.
- Serdyuchenko, A., Gorshelev, V., Weber, M., Chehade, W., and Burrows, J. P.: High spectral resolution ozone absorption cross-sections &ndash; Part 2: Temperature dependence, *Atmospheric Measurement Techniques*, 7, 625–636, <https://doi.org/10.5194/amt-7-625-2014>, <https://amt.copernicus.org/articles/7/625/2014/>, 2014.
- 20 Shettle, E. P. and Fenn, R. W.: *Models for the aerosols of the lower atmosphere and the effects of humidity variations on their optical properties*, Environmental Research Papers, Air Force Geophysics Lab., Hanscom AFB, MA. Optical Physics Div, 1979.
- Shi, C., Hashimoto, M., Shiomi, K., and Nakajima, T.: Development of an Algorithm to Retrieve Aerosol Optical Properties Over Water Using an Artificial Neural Network Radiative Transfer Scheme: First Result From GOSAT-2/CAI-2, *IEEE TRANSACTIONS ON GEOSCIENCE AND REMOTE SENSING*, 2020.
- 25 Shiraiwa, M., Ueda, K., Pozzer, A., Lammel, G., Kampf, C. J., Fushimi, A., Enami, S., Arangio, A. M., Fröhlich-Nowoisky, J., Fujitani, Y., Furuyama, A., Lakey, P. S. J., Lelieveld, J., Lucas, K., Morino, Y., Pöschl, U., Takahama, S., Takami, A., Tong, H., Weber, B., Yoshino, A., and Sato, K.: Aerosol Health Effects from Molecular to Global Scales, *Environ. Sci. Technol.*, 51, 13 545–13 567, <https://doi.org/10.1021/acs.est.7b04417>, <https://doi.org/10.1021/acs.est.7b04417>, 2017.
- 30 Silverman, B.: *Density Estimation for Statistics and Data Analysis*, Vol. 26, Monographs on Statistics and Applied Probability, 1986.
- Smit, J. M., Rietjens, J. H. H., van Harten, G., Noia, A. D., Laauwen, W., Rheingans, B. E., Diner, D. J., Cairns, B., Wasilewski, A., Knobelspiesse, K. D., Ferrare, R., and Hasekamp, O. P.: SPEX airborne spectropolarimeter calibration and performance, *Appl. Opt.*, 58, 5695–5719, <https://doi.org/10.1364/AO.58.005695>, <http://ao.osa.org/abstract.cfm?URI=ao-58-21-5695>, 2019.
- Stamnes, S., Hostetler, C., Ferrare, R., Burton, S., Liu, X., Hair, J., Hu, Y., Wasilewski, A., Martin, W., van Diedenhoven, B., Chowdhary, J., Cetinić, I., Berg, L. K., Stamnes, K., and Cairns, B.: Simultaneous polarimeter retrievals of microphysical aerosol and ocean color parameters from the “MAPP” algorithm with comparison to high-spectral-resolution lidar aerosol and ocean products, *Appl. Opt.*, 57, 2394–2413, <https://doi.org/10.1364/AO.57.002394>, <http://ao.osa.org/abstract.cfm?URI=ao-57-10-2394>, 2018.

- Stap, F. A., Hasekamp, O. P., and Röckmann, T.: Sensitivity of PARASOL multi-angle photopolarimetric aerosol retrievals to cloud contamination, *Atmospheric Measurement Techniques*, 8, 1287–1301, <https://doi.org/10.5194/amt-8-1287-2015>, <https://www.atmos-meas-tech.net/8/1287/2015/>, 2015.
- Tanré, D., Bréon, F. M., Deuzé, J. L., Dubovik, O., Ducos, F., François, P., Goloub, P., Herman, M., Lifermann, A., and Waquet, F.: Remote sensing of aerosols by using polarized, directional and spectral measurements within the A-Train: the PARASOL mission, *Atmos. Meas. Tech.*, 4, 1383–1395, <https://doi.org/10.5194/amt-4-1383-2011>, 2011.
- UMBC Earth and Space Institute: HARP CubeSat, <https://esi.umbc.edu/hyper-angular-rainbow-polarimeter/>.
- Virtanen, P., Gommers, R., Oliphant, T. E., Haberland, M., Reddy, T., Cournapeau, D., Burovski, E., Peterson, P., Weckesser, W., Bright, J., van der Walt, S. J., Brett, M., Wilson, J., Millman, K. J., Mayorov, N., Nelson, A. R. J., Jones, E., Kern, R., Larson, E., Carey, C. J., Polat, İ., Feng, Y., Moore, E. W., VanderPlas, J., Laxalde, D., Perktold, J., Cimrman, R., Henriksen, I., Quintero, E. A., Harris, C. R., Archibald, A. M., Ribeiro, A. H., Pedregosa, F., van Mulbregt, P., and SciPy 1.0 Contributors: SciPy 1.0: Fundamental Algorithms for Scientific Computing in Python, *Nature Methods*, 17, 261–272, <https://doi.org/10.1038/s41592-019-0686-2>, 2020.
- Wang, J., Xu, X., Ding, S., Zeng, J., Spurr, R., Liu, X., Chance, K., and Mishchenko, M.: A numerical testbed for remote sensing of aerosols, and its demonstration for evaluating retrieval synergy from a geostationary satellite constellation of GEO-CAPE and GOES-R, *Journal of Quantitative Spectroscopy and Radiative Transfer*, 146, 510 – 528, <https://doi.org/https://doi.org/10.1016/j.jqsrt.2014.03.020>, <http://www.sciencedirect.com/science/article/pii/S0022407314001368>, electromagnetic and Light Scattering by Nonspherical Particles XIV, 2014.
- Werdell, P. J., Behrenfeld, M. J., Bontempi, P. S., Boss, E., Cairns, B., Davis, G. T., Franz, B. A., Gliese, U. B., Gorman, E. T., Hasekamp, O., Knobelspiesse, K. D., Mannino, A., Martins, J. V., McClain, C. R., Meister, G., and Remer, L. A.: The Plankton, Aerosol, Cloud, Ocean Ecosystem Mission: Status, Science, Advances, *Bulletin of the American Meteorological Society*, 100, 1775–1794, <https://doi.org/10.1175/BAMS-D-18-0056.1>, <https://doi.org/10.1175/BAMS-D-18-0056.1>, 2019.
- Westberry, T., Shi, Y., Yu, H., Behrenfeld, M., and Remer, L.: Satellite-Detected Ocean Ecosystem Response to Volcanic Eruptions in the Subarctic Northeast Pacific Ocean, *Geophysical Research Letters*, 46, 11 270–11 280, <https://doi.org/10.1029/2019GL083977>, <https://agupubs.onlinelibrary.wiley.com/doi/abs/10.1029/2019GL083977>, 2019.
- Wu, L., Hasekamp, O., van Diedenhoven, B., and Cairns, B.: Aerosol retrieval from multiangle, multispectral photopolarimetric measurements: importance of spectral range and angular resolution, *Atmospheric Measurement Techniques*, 8, 2625–2638, <https://doi.org/10.5194/amt-8-2625-2015>, <https://www.atmos-meas-tech.net/8/2625/2015/>, 2015.
- Xu, F., Dubovik, O., Zhai, P. W., Diner, D. J., Kalashnikova, O. V., Seidel, F. C., Litvinov, P., Bovchaliuk, A., Garay, M. J., van Harten, G., and Davis, A. B.: Joint retrieval of aerosol and water-leaving radiance from multispectral, multiangular and polarimetric measurements over ocean, *Atmospheric Measurement Techniques*, 9, 2877–2907, 2016.
- Xu, F., Diner, D. J., Dubovik, O., and Schechner, Y.: A Correlated Multi-Pixel Inversion Approach for Aerosol Remote Sensing, *Remote Sensing*, 11, <https://doi.org/10.3390/rs11070746>, <https://www.mdpi.com/2072-4292/11/7/746>, 2019.
- Zhai, P.-W., Kattawar, G. W., and Yang, P.: Impulse response solution to the three-dimensional vector radiative transfer equation in atmosphere-ocean systems. I. Monte Carlo method, *Applied Optics*, 47, 1037–1047, 2008.
- Zhai, P.-W., Hu, Y., Trepte, C. R., and Lucker, P. L.: A vector radiative transfer model for coupled atmosphere and ocean systems based on successive order of scattering method, *Optics Express*, 17, 2057–2079, 2009.
- Zhai, P.-W., Hu, Y., Chowdhary, J., Trepte, C. R., Lucker, P. L., and Josset, D. B.: A vector radiative transfer model for coupled atmosphere and ocean systems with a rough interface, *Journal of Quantitative Spectroscopy and Radiative Transfer*, 111, 1025–1040, 2010.

Zhai, P.-W., Boss, E., Franz, B., Werdell, P. J., and Hu, Y.: Radiative Transfer Modeling of Phytoplankton Fluorescence Quenching Processes, *Remote Sensing*, 10, 1309, <https://doi.org/10.3390/rs10081309>, <http://www.mdpi.com/2072-4292/10/8/1309>, 2018.

Zibordi, G., Mélin, F., Berthon, J.-F., Holben, B., Slutsker, I., Giles, D., D'Alimonte, D., Vandemark, D., Feng, H., Schuster, G., Fabbri, B. E., Kaitala, S., and Seppälä, J.: AERONET-OC: A Network for the Validation of Ocean Color Primary Products, *Journal of Atmospheric and*

5 *Oceanic Technology*, 26, 1634–1651, <https://doi.org/10.1175/2009JTECHO654.1>, <https://doi.org/10.1175/2009JTECHO654.1>, 2009.
